# Supplementary material for: Resistance to post-emergent herbicides is becoming common for grass weeds on New Zealand wheat and barley farms
Source: PLoS One. 2021 Oct 14;16(10):e0258685. doi: 10.1371/journal.pone.0258685 (PMC8516262; doi:10.1371/journal.pone.0258685)
Supplement: S1 Appendix — (XLSX) [file pone.0258685.s001.xlsx]

## Sheet: Appendix_S1
Farm_ID	FAR_ID	SampleNumber	Herbicide_Group	Genus	RandomSurvey	Region	SampleSpecies	Ingredient	ApplicationRate	Treated	Surviving	Killed	Proportion_Surviving	CountFarm	TestedFarms	Status
1	16	144	ACCase	Avena	TRUE	Lincoln	Avena fatua	Pinoxaden	25	6	0	6	0	0	1	Susceptible
1	16	145	ACCase	Lolium	TRUE	Lincoln	Lolium perenne	Clethodim	120	12	0	12	0	0	1	Susceptible
1	16	145	ACCase	Lolium	TRUE	Lincoln	Lolium perenne	Haloxyfop	60	28	0	28	0	0	1	Susceptible
1	16	145	ACCase	Lolium	TRUE	Lincoln	Lolium perenne	Pinoxaden	30	16	0	16	0	0	1	Susceptible
1	16	145	ALS	Lolium	TRUE	Lincoln	Lolium perenne	Iodosulfuron	7.5	19	0	19	0	0	1	Susceptible
1	16	145	ALS	Lolium	TRUE	Lincoln	Lolium perenne	Pyroxsulam	15	23	3	20	13	0	1	Susceptible
1	16	145	EPSPS	Lolium	TRUE	Lincoln	Lolium perenne	Glyphosate	1458	28	0	28	0	0	1	Susceptible
1	16	146	ACCase	Bromus	TRUE	Lincoln	Bromus hordeaceus	Clethodim	120	64	0	64	0	0	1	Susceptible
1	16	146	ACCase	Bromus	TRUE	Lincoln	Bromus hordeaceus	Haloxyfop	60	147	0	147	0	0	1	Susceptible
1	16	146	EPSPS	Bromus	TRUE	Lincoln	Bromus hordeaceus	Glyphosate	1458	123	0	123	0	0	1	Susceptible
1	16	147	ACCase	Bromus	TRUE	Lincoln	Bromus diandrus	Clethodim	120	26	0	26	0	0	1	Susceptible
1	16	147	ACCase	Bromus	TRUE	Lincoln	Bromus diandrus	Haloxyfop	60	40	0	40	0	0	1	Susceptible
1	16	147	ALS	Bromus	TRUE	Lincoln	Bromus diandrus	Pyroxsulam	15	20	0	20	0	0	1	Susceptible
1	16	147	EPSPS	Bromus	TRUE	Lincoln	Bromus diandrus	Glyphosate	1458	22	0	22	0	0	1	Susceptible
1	16	148	ACCase	Lolium	TRUE	Lincoln	Lolium perenne	Clethodim	120	10	0	10	0	0	1	Susceptible
1	16	148	ACCase	Lolium	TRUE	Lincoln	Lolium perenne	Haloxyfop	60	35	0	35	0	0	1	Susceptible
1	16	148	ACCase	Lolium	TRUE	Lincoln	Lolium perenne	Pinoxaden	30	20	0	20	0	0	1	Susceptible
1	16	148	ALS	Lolium	TRUE	Lincoln	Lolium perenne	Iodosulfuron	7.5	16	0	16	0	0	1	Susceptible
1	16	148	ALS	Lolium	TRUE	Lincoln	Lolium perenne	Pyroxsulam	15	13	0	13	0	0	1	Susceptible
1	16	148	EPSPS	Lolium	TRUE	Lincoln	Lolium perenne	Glyphosate	1458	33	0	33	0	0	1	Susceptible
1	16	149	ALS	Lolium	TRUE	Lincoln	Lolium perenne	Pyroxsulam	15	10	1	9	10	0	1	Susceptible
1	16	150	ACCase	Avena	TRUE	Lincoln	Avena fatua	Clethodim	120	51	0	51	0	0	1	Susceptible
1	16	150	ACCase	Avena	TRUE	Lincoln	Avena fatua	Fenoxaprop	51.75	27	0	27	0	0	1	Susceptible
1	16	150	ACCase	Avena	TRUE	Lincoln	Avena fatua	Haloxyfop	52	10	0	10	0	0	1	Susceptible
4	27	142	ACCase	Phalaris	TRUE	Lincoln	Phalaris minor	Fenoxaprop	51.75	16	0	16	0	0	1	Susceptible
4	27	142	ACCase	Phalaris	TRUE	Lincoln	Phalaris minor	Haloxyfop	60	9	0	9	0	0	1	Susceptible
4	27	142	ACCase	Phalaris	TRUE	Lincoln	Phalaris minor	Pinoxaden	30	16	0	16	0	0	1	Susceptible
4	27	142	ALS	Phalaris	TRUE	Lincoln	Phalaris minor	Clodinafop	24	32	0	32	0	0	1	Susceptible
4	27	142	ALS	Phalaris	TRUE	Lincoln	Phalaris minor	Iodosulfuron	7.5	8	0	8	0	0	1	Susceptible
4	27	142	EPSPS	Phalaris	TRUE	Lincoln	Phalaris minor	Glyphosate	1458	16	0	16	0	0	1	Susceptible
4	27	143	ACCase	Phalaris	TRUE	Lincoln	Phalaris minor	Clethodim	120	8	0	8	0	0	1	Susceptible
4	27	143	ACCase	Phalaris	TRUE	Lincoln	Phalaris minor	Pinoxaden	30	6	0	6	0	0	1	Susceptible
4	27	143	ALS	Phalaris	TRUE	Lincoln	Phalaris minor	Clodinafop	24	25	0	25	0	0	1	Susceptible
4	27	1875	ACCase	Phalaris	TRUE	Lincoln	Phalaris minor	Clethodim	240	7	0	7	0	0	1	Susceptible
4	27	1875	ACCase	Phalaris	TRUE	Lincoln	Phalaris minor	Fenoxaprop	51.75	9	0	9	0	0	1	Susceptible
4	27	1875	ACCase	Phalaris	TRUE	Lincoln	Phalaris minor	Haloxyfop	60	6	0	6	0	0	1	Susceptible
4	27	1875	ACCase	Phalaris	TRUE	Lincoln	Phalaris minor	Pinoxaden	30	10	0	10	0	0	1	Susceptible
4	27	1875	ALS	Phalaris	TRUE	Lincoln	Phalaris minor	Clodinafop	72	5	0	5	0	0	1	Susceptible
4	27	1879	ACCase	Phalaris	TRUE	Lincoln	Phalaris minor	Clethodim	240	9	0	9	0	0	1	Susceptible
4	27	1879	ACCase	Phalaris	TRUE	Lincoln	Phalaris minor	Fenoxaprop	51.75	10	0	10	0	0	1	Susceptible
4	27	1879	ACCase	Phalaris	TRUE	Lincoln	Phalaris minor	Pinoxaden	30	10	0	10	0	0	1	Susceptible
4	27	1879	ALS	Phalaris	TRUE	Lincoln	Phalaris minor	Clodinafop	24	10	0	10	0	0	1	Susceptible
34	207	140	EPSPS	Vulpia	TRUE	Lincoln	Vulpia bromoides	Glyphosate	1458	19	0	19	0	0	1	Susceptible
34	207	141	ACCase	Avena	TRUE	Lincoln	Avena fatua	Haloxyfop	52	6	0	6	0	0	1	Susceptible
34	207	141	ACCase	Avena	TRUE	Lincoln	Avena fatua	Pinoxaden	25	8	0	8	0	0	1	Susceptible
35	208	139	ACCase	Avena	TRUE	Lincoln	Avena fatua	Clethodim	120	40	0	40	0	0	1	Susceptible
35	208	139	ACCase	Avena	TRUE	Lincoln	Avena fatua	Fenoxaprop	51.75	5	0	5	0	0	1	Susceptible
35	208	139	ACCase	Avena	TRUE	Lincoln	Avena fatua	Haloxyfop	52	10	0	10	0	0	1	Susceptible
35	208	139	ACCase	Avena	TRUE	Lincoln	Avena fatua	Haloxyfop	60	18	0	18	0	0	1	Susceptible
35	208	139	ACCase	Avena	TRUE	Lincoln	Avena fatua	Pinoxaden	25	11	0	11	0	0	1	Susceptible
74	328	134	ACCase	Lolium	TRUE	Lincoln	Lolium multiflorum	Clethodim	120	50	0	50	0	0	1	Susceptible
74	328	134	ACCase	Lolium	TRUE	Lincoln	Lolium multiflorum	Haloxyfop	60	184	104	80	57	1	1	Resistant
74	328	134	ACCase	Lolium	TRUE	Lincoln	Lolium multiflorum	Pinoxaden	30	221	31	190	14	1	1	Resistant
74	328	134	ALS	Lolium	TRUE	Lincoln	Lolium multiflorum	Iodosulfuron	7.5	49	0	49	0	0	1	Susceptible
74	328	134	ALS	Lolium	TRUE	Lincoln	Lolium multiflorum	Pyroxsulam	15	75	22	53	29	1	1	Resistant
74	328	134	EPSPS	Lolium	TRUE	Lincoln	Lolium multiflorum	Glyphosate	1458	52	0	52	0	0	1	Susceptible
74	328	134	EPSPS	Lolium	TRUE	Lincoln	Lolium multiflorum	Glyphosate	1498	53	0	53	0	0	1	Susceptible
74	328	135	ACCase	Bromus	TRUE	Lincoln	Bromus catharticus	Clethodim	120	69	0	69	0	0	1	Susceptible
74	328	135	ACCase	Bromus	TRUE	Lincoln	Bromus catharticus	Haloxyfop	60	71	0	71	0	0	1	Susceptible
74	328	135	ALS	Bromus	TRUE	Lincoln	Bromus catharticus	Pyroxsulam	15	40	0	40	0	0	1	Susceptible
74	328	135	EPSPS	Bromus	TRUE	Lincoln	Bromus catharticus	Glyphosate	1458	64	0	64	0	0	1	Susceptible
74	328	136	ACCase	Lolium	TRUE	Lincoln	Lolium perenne	Haloxyfop	60	174	112	62	64	1	1	Resistant
74	328	136	ALS	Lolium	TRUE	Lincoln	Lolium perenne	Iodosulfuron	7.5	29	0	29	0	0	1	Susceptible
74	328	136	ALS	Lolium	TRUE	Lincoln	Lolium perenne	Pyroxsulam	15	150	46	104	31	1	1	Resistant
74	328	136	EPSPS	Lolium	TRUE	Lincoln	Lolium perenne	Glyphosate	1458	21	0	21	0	0	1	Susceptible
74	328	136	EPSPS	Lolium	TRUE	Lincoln	Lolium perenne	Glyphosate	1498	204	0	204	0	0	1	Susceptible
74	328	137	ACCase	Bromus	TRUE	Lincoln	Bromus hordeaceus	Clethodim	120	73	0	73	0	0	1	Susceptible
74	328	137	ACCase	Bromus	TRUE	Lincoln	Bromus hordeaceus	Haloxyfop	60	154	0	154	0	0	1	Susceptible
74	328	137	ALS	Bromus	TRUE	Lincoln	Bromus hordeaceus	Pyroxsulam	15	25	0	25	0	0	1	Susceptible
74	328	137	EPSPS	Bromus	TRUE	Lincoln	Bromus hordeaceus	Glyphosate	1458	129	0	129	0	0	1	Susceptible
74	328	1307	ACCase	Lolium	TRUE	Lincoln	Lolium hybridum	Haloxyfop	125	9	9	0	100	1	1	Resistant
74	328	1307	ACCase	Lolium	TRUE	Lincoln	Lolium hybridum	Pinoxaden	30	9	6	3	67	1	1	Resistant
74	328	1307	ALS	Lolium	TRUE	Lincoln	Lolium hybridum	Pyroxsulam	15	10	0	10	0	0	1	Susceptible
144	574	766	ACCase	Avena	TRUE	Timaru	Avena fatua	Fenoxaprop	51.75	9	0	9	0	0	1	Susceptible
144	574	767	ACCase	Avena	TRUE	Timaru	Avena fatua	Fenoxaprop	51.75	12	0	12	0	0	1	Susceptible
144	574	767	ALS	Avena	TRUE	Timaru	Avena fatua	Pyroxsulam	30	6	0	6	0	0	1	Susceptible
144	574	767	EPSPS	Avena	TRUE	Timaru	Avena fatua	Glyphosate	1458	5	0	5	0	0	1	Susceptible
144	574	768	ACCase	Avena	TRUE	Timaru	Avena fatua	Fenoxaprop	51.75	16	0	16	0	0	1	Susceptible
144	574	768	ALS	Avena	TRUE	Timaru	Avena fatua	Pyroxsulam	15	16	0	16	0	0	1	Susceptible
144	574	768	ALS	Avena	TRUE	Timaru	Avena fatua	Pyroxsulam	30	6	0	6	0	0	1	Susceptible
144	574	769	ACCase	Avena	TRUE	Timaru	Avena fatua	Fenoxaprop	51.75	10	0	10	0	0	1	Susceptible
144	574	851	ACCase	Lolium	TRUE	Timaru	Lolium multiflorum	Haloxyfop	60	17	0	17	0	0	1	Susceptible
144	574	851	ACCase	Lolium	TRUE	Timaru	Lolium multiflorum	Pinoxaden	30	18	16	2	89	1	1	Resistant
144	574	851	ALS	Lolium	TRUE	Timaru	Lolium multiflorum	Iodosulfuron	7.5	19	19	0	100	1	1	Resistant
144	574	851	EPSPS	Lolium	TRUE	Timaru	Lolium multiflorum	Glyphosate	1458	16	0	16	0	0	1	Susceptible
144	574	853	ACCase	Lolium	TRUE	Timaru	Lolium multiflorum	Haloxyfop	125	19	0	19	0	0	1	Susceptible
144	574	853	ACCase	Lolium	TRUE	Timaru	Lolium multiflorum	Pinoxaden	30	18	7	11	39	1	1	Resistant
144	574	853	ALS	Lolium	TRUE	Timaru	Lolium multiflorum	Iodosulfuron	7.5	14	14	0	100	1	1	Resistant
144	574	853	EPSPS	Lolium	TRUE	Timaru	Lolium multiflorum	Glyphosate	1458	17	0	17	0	0	1	Susceptible
144	574	854	ACCase	Lolium	TRUE	Timaru	Lolium multiflorum	Haloxyfop	125	17	0	17	0	0	1	Susceptible
144	574	854	ACCase	Lolium	TRUE	Timaru	Lolium multiflorum	Pinoxaden	30	17	11	6	65	1	1	Resistant
144	574	854	ALS	Lolium	TRUE	Timaru	Lolium multiflorum	Iodosulfuron	7.5	13	13	0	100	1	1	Resistant
144	574	854	EPSPS	Lolium	TRUE	Timaru	Lolium multiflorum	Glyphosate	1458	18	0	18	0	0	1	Susceptible
144	574	855	ACCase	Lolium	TRUE	Timaru	Lolium multiflorum	Haloxyfop	60	9	0	9	0	0	1	Susceptible
144	574	855	ACCase	Lolium	TRUE	Timaru	Lolium multiflorum	Pinoxaden	30	11	5	6	45	1	1	Resistant
144	574	855	ALS	Lolium	TRUE	Timaru	Lolium multiflorum	Iodosulfuron	7.5	7	7	0	100	1	1	Resistant
144	574	855	EPSPS	Lolium	TRUE	Timaru	Lolium multiflorum	Glyphosate	1458	11	0	11	0	0	1	Susceptible
144	574	856	ACCase	Lolium	TRUE	Timaru	Lolium multiflorum	Haloxyfop	125	11	0	11	0	0	1	Susceptible
144	574	856	ACCase	Lolium	TRUE	Timaru	Lolium multiflorum	Pinoxaden	30	7	3	4	43	0	1	Susceptible
144	574	856	ALS	Lolium	TRUE	Timaru	Lolium multiflorum	Iodosulfuron	7.5	9	9	0	100	1	1	Resistant
144	574	856	EPSPS	Lolium	TRUE	Timaru	Lolium multiflorum	Glyphosate	1458	8	0	8	0	0	1	Susceptible
144	574	857	ACCase	Lolium	TRUE	Timaru	Lolium multiflorum	Clethodim	120	13	0	13	0	0	1	Susceptible
144	574	857	ACCase	Lolium	TRUE	Timaru	Lolium multiflorum	Haloxyfop	60	15	0	15	0	0	1	Susceptible
144	574	857	ACCase	Lolium	TRUE	Timaru	Lolium multiflorum	Pinoxaden	30	14	13	1	93	1	1	Resistant
144	574	857	ALS	Lolium	TRUE	Timaru	Lolium multiflorum	Iodosulfuron	7.5	16	15	1	94	1	1	Resistant
144	574	857	ALS	Lolium	TRUE	Timaru	Lolium multiflorum	Pyroxsulam	15	14	14	0	100	1	1	Resistant
144	574	857	EPSPS	Lolium	TRUE	Timaru	Lolium multiflorum	Glyphosate	1458	16	0	16	0	0	1	Susceptible
144	574	858	ACCase	Lolium	TRUE	Timaru	Lolium multiflorum	Clethodim	120	17	0	17	0	0	1	Susceptible
144	574	858	ACCase	Lolium	TRUE	Timaru	Lolium multiflorum	Haloxyfop	60	15	0	15	0	0	1	Susceptible
144	574	858	ACCase	Lolium	TRUE	Timaru	Lolium multiflorum	Pinoxaden	30	14	8	6	57	1	1	Resistant
144	574	858	ALS	Lolium	TRUE	Timaru	Lolium multiflorum	Iodosulfuron	7.5	17	14	3	82	1	1	Resistant
144	574	858	ALS	Lolium	TRUE	Timaru	Lolium multiflorum	Pyroxsulam	15	18	18	0	100	1	1	Resistant
144	574	858	EPSPS	Lolium	TRUE	Timaru	Lolium multiflorum	Glyphosate	1458	18	0	18	0	0	1	Susceptible
144	574	859	ACCase	Lolium	TRUE	Timaru	Lolium multiflorum	Haloxyfop	125	14	0	14	0	0	1	Susceptible
144	574	859	ACCase	Lolium	TRUE	Timaru	Lolium multiflorum	Pinoxaden	30	8	8	0	100	1	1	Resistant
144	574	859	ALS	Lolium	TRUE	Timaru	Lolium multiflorum	Iodosulfuron	7.5	11	11	0	100	1	1	Resistant
144	574	859	EPSPS	Lolium	TRUE	Timaru	Lolium multiflorum	Glyphosate	1458	18	0	18	0	0	1	Susceptible
144	574	860	ACCase	Lolium	TRUE	Timaru	Lolium multiflorum	Haloxyfop	125	16	0	16	0	0	1	Susceptible
144	574	860	ACCase	Lolium	TRUE	Timaru	Lolium multiflorum	Pinoxaden	30	14	14	0	100	1	1	Resistant
144	574	860	ALS	Lolium	TRUE	Timaru	Lolium multiflorum	Iodosulfuron	7.5	19	19	0	100	1	1	Resistant
144	574	860	EPSPS	Lolium	TRUE	Timaru	Lolium multiflorum	Glyphosate	1458	16	0	16	0	0	1	Susceptible
172	695	133	ACCase	Bromus	TRUE	Lincoln	Bromus hordeaceus	Clethodim	120	69	0	69	0	0	1	Susceptible
172	695	133	ACCase	Bromus	TRUE	Lincoln	Bromus hordeaceus	Haloxyfop	60	133	0	133	0	0	1	Susceptible
172	695	133	EPSPS	Bromus	TRUE	Lincoln	Bromus hordeaceus	Glyphosate	1458	121	0	121	0	0	1	Susceptible
179	743	131	ACCase	Avena	TRUE	Lincoln	Avena fatua	Clethodim	120	24	0	24	0	0	1	Susceptible
179	743	131	ACCase	Avena	TRUE	Lincoln	Avena fatua	Fenoxaprop	51.75	29	1	28	3	0	1	Susceptible
179	743	131	ACCase	Avena	TRUE	Lincoln	Avena fatua	Haloxyfop	52	10	0	10	0	0	1	Susceptible
179	743	131	ACCase	Avena	TRUE	Lincoln	Avena fatua	Haloxyfop	60	63	0	63	0	0	1	Susceptible
179	743	131	ACCase	Avena	TRUE	Lincoln	Avena fatua	Pinoxaden	25	10	0	10	0	0	1	Susceptible
179	743	131	ACCase	Avena	TRUE	Lincoln	Avena fatua	Pinoxaden	30	16	0	16	0	0	1	Susceptible
179	743	131	EPSPS	Avena	TRUE	Lincoln	Avena fatua	Glyphosate	1458	29	0	29	0	0	1	Susceptible
179	743	230	ACCase	Avena	TRUE	Lincoln	Avena fatua	Fenoxaprop	51.75	12	12	0	100	1	1	Resistant
179	743	230	ACCase	Avena	TRUE	Lincoln	Avena fatua	Pinoxaden	30	13	0	13	0	0	1	Susceptible
179	743	230	ALS	Avena	TRUE	Lincoln	Avena fatua	Pyroxsulam	15	14	0	14	0	0	1	Susceptible
179	743	230	EPSPS	Avena	TRUE	Lincoln	Avena fatua	Glyphosate	702	15	0	15	0	0	1	Susceptible
179	743	232	ACCase	Avena	TRUE	Lincoln	Avena fatua	Clethodim	120	17	0	17	0	0	1	Susceptible
179	743	232	ACCase	Avena	TRUE	Lincoln	Avena fatua	Fenoxaprop	51.75	18	0	18	0	0	1	Susceptible
179	743	232	ACCase	Avena	TRUE	Lincoln	Avena fatua	Pinoxaden	30	20	0	20	0	0	1	Susceptible
179	743	232	ALS	Avena	TRUE	Lincoln	Avena fatua	Pyroxsulam	15	19	0	19	0	0	1	Susceptible
179	743	232	EPSPS	Avena	TRUE	Lincoln	Avena fatua	Glyphosate	702	18	0	18	0	0	1	Susceptible
179	743	234	ACCase	Avena	TRUE	Lincoln	Avena fatua	Fenoxaprop	51.75	15	0	15	0	0	1	Susceptible
179	743	234	ACCase	Avena	TRUE	Lincoln	Avena fatua	Pinoxaden	30	14	0	14	0	0	1	Susceptible
179	743	234	ALS	Avena	TRUE	Lincoln	Avena fatua	Pyroxsulam	15	13	0	13	0	0	1	Susceptible
179	743	234	EPSPS	Avena	TRUE	Lincoln	Avena fatua	Glyphosate	702	14	0	14	0	0	1	Susceptible
179	743	237	ACCase	Avena	TRUE	Lincoln	Avena fatua	Clethodim	120	10	0	10	0	0	1	Susceptible
179	743	237	ACCase	Avena	TRUE	Lincoln	Avena fatua	Fenoxaprop	51.75	12	0	12	0	0	1	Susceptible
179	743	237	ACCase	Avena	TRUE	Lincoln	Avena fatua	Pinoxaden	30	13	0	13	0	0	1	Susceptible
179	743	237	ALS	Avena	TRUE	Lincoln	Avena fatua	Pyroxsulam	15	14	0	14	0	0	1	Susceptible
179	743	237	EPSPS	Avena	TRUE	Lincoln	Avena fatua	Glyphosate	702	14	0	14	0	0	1	Susceptible
199	810	127	ALS	Lolium	TRUE	Lincoln	Lolium perenne	Iodosulfuron	7.5	8	0	8	0	0	1	Susceptible
199	810	127	ALS	Lolium	TRUE	Lincoln	Lolium perenne	Pyroxsulam	15	5	0	5	0	0	1	Susceptible
199	810	128	ACCase	Lolium	TRUE	Lincoln	Lolium perenne	Clethodim	120	6	0	6	0	0	1	Susceptible
199	810	128	ACCase	Lolium	TRUE	Lincoln	Lolium perenne	Haloxyfop	60	13	0	13	0	0	1	Susceptible
199	810	128	ACCase	Lolium	TRUE	Lincoln	Lolium perenne	Pinoxaden	30	12	0	12	0	0	1	Susceptible
199	810	128	ALS	Lolium	TRUE	Lincoln	Lolium perenne	Iodosulfuron	7.5	6	0	6	0	0	1	Susceptible
199	810	128	ALS	Lolium	TRUE	Lincoln	Lolium perenne	Pyroxsulam	15	7	0	7	0	0	1	Susceptible
199	810	128	EPSPS	Lolium	TRUE	Lincoln	Lolium perenne	Glyphosate	1458	12	0	12	0	0	1	Susceptible
199	810	129	ACCase	Avena	TRUE	Lincoln	Avena fatua	Clethodim	120	49	0	49	0	0	1	Susceptible
199	810	129	ACCase	Avena	TRUE	Lincoln	Avena fatua	Fenoxaprop	51.75	49	0	49	0	0	1	Susceptible
199	810	129	ACCase	Avena	TRUE	Lincoln	Avena fatua	Haloxyfop	52	6	0	6	0	0	1	Susceptible
199	810	129	ACCase	Avena	TRUE	Lincoln	Avena fatua	Pinoxaden	25	6	0	6	0	0	1	Susceptible
199	810	154	ACCase	Bromus	TRUE	Lincoln	Bromus catharticus	Clethodim	120	27	0	27	0	0	1	Susceptible
199	810	154	ACCase	Bromus	TRUE	Lincoln	Bromus catharticus	Haloxyfop	60	26	0	26	0	0	1	Susceptible
199	810	154	ALS	Bromus	TRUE	Lincoln	Bromus catharticus	Pyroxsulam	15	26	0	26	0	0	1	Susceptible
199	810	154	EPSPS	Bromus	TRUE	Lincoln	Bromus catharticus	Glyphosate	1458	31	0	31	0	0	1	Susceptible
221	894	122	ACCase	Phalaris	TRUE	Lincoln	Phalaris minor	Clethodim	120	12	0	12	0	0	1	Susceptible
221	894	122	ALS	Phalaris	TRUE	Lincoln	Phalaris minor	Clodinafop	24	14	0	14	0	0	1	Susceptible
221	894	123	ACCase	Bromus	TRUE	Lincoln	Bromus catharticus	Clethodim	120	62	0	62	0	0	1	Susceptible
221	894	123	ACCase	Bromus	TRUE	Lincoln	Bromus catharticus	Haloxyfop	60	72	0	72	0	0	1	Susceptible
221	894	123	ALS	Bromus	TRUE	Lincoln	Bromus catharticus	Pyroxsulam	15	45	0	45	0	0	1	Susceptible
221	894	123	EPSPS	Bromus	TRUE	Lincoln	Bromus catharticus	Glyphosate	1458	58	0	58	0	0	1	Susceptible
221	894	124	ACCase	Lolium	TRUE	Lincoln	Lolium perenne	Clethodim	120	19	0	19	0	0	1	Susceptible
221	894	124	ALS	Lolium	TRUE	Lincoln	Lolium perenne	Iodosulfuron	7.5	20	0	20	0	0	1	Susceptible
221	894	126	ACCase	Avena	TRUE	Lincoln	Avena fatua	Clethodim	120	44	0	44	0	0	1	Susceptible
221	894	126	ACCase	Avena	TRUE	Lincoln	Avena fatua	Fenoxaprop	51.75	47	6	41	13	1	1	Resistant
221	894	126	ACCase	Avena	TRUE	Lincoln	Avena fatua	Haloxyfop	52	10	0	10	0	0	1	Susceptible
221	894	126	ACCase	Avena	TRUE	Lincoln	Avena fatua	Pinoxaden	25	12	0	12	0	0	1	Susceptible
221	894	180	ACCase	Avena	TRUE	Lincoln	Avena fatua	Haloxyfop	52	8	0	8	0	0	1	Susceptible
221	894	180	ACCase	Avena	TRUE	Lincoln	Avena fatua	Pinoxaden	25	8	0	8	0	0	1	Susceptible
227	941	511	ALS	Sonchus	TRUE	Lincoln	Sonchus asper	Chlorsulfuron	15	9	9	0	100	1	1	Resistant
227	941	511	EPSPS	Sonchus	TRUE	Lincoln	Sonchus asper	Glyphosate	1458	7	0	7	0	0	1	Susceptible
230	951	153	ACCase	Lolium	FALSE	Lincoln	Lolium perenne	Clethodim	120	21	0	21	0	0	1	Susceptible
230	951	153	ACCase	Lolium	FALSE	Lincoln	Lolium perenne	Haloxyfop	60	216	32	184	15	1	1	Resistant
230	951	153	ACCase	Lolium	FALSE	Lincoln	Lolium perenne	Pinoxaden	30	38	0	38	0	0	1	Susceptible
230	951	153	ALS	Lolium	FALSE	Lincoln	Lolium perenne	Iodosulfuron	7.5	35	2	33	6	0	1	Susceptible
230	951	153	ALS	Lolium	FALSE	Lincoln	Lolium perenne	Pyroxsulam	15	120	104	16	87	1	1	Resistant
230	951	153	EPSPS	Lolium	FALSE	Lincoln	Lolium perenne	Glyphosate	1498	67	0	67	0	0	1	Susceptible
230	951	1352	ACCase	Lolium	FALSE	Lincoln	Lolium perenne	Haloxyfop	60	8	7	1	88	1	1	Resistant
230	951	1359	ACCase	Lolium	FALSE	Lincoln	Lolium perenne	Haloxyfop	60	10	10	0	100	1	1	Resistant
230	951	2112	EPSPS	Lolium	FALSE	Lincoln	Lolium multiflorum	Glyphosate	1458	6	0	6	0	0	1	Susceptible
240	981	339	ACCase	Vulpia	TRUE	Timaru	Vulpia bromoides	Clethodim	240	19	0	19	0	0	1	Susceptible
240	981	339	EPSPS	Vulpia	TRUE	Timaru	Vulpia bromoides	Glyphosate	1458	19	0	19	0	0	1	Susceptible
240	981	426	ACCase	Bromus	TRUE	Timaru	Bromus catharticus	Clethodim	240	7	0	7	0	0	1	Susceptible
240	981	426	ACCase	Bromus	TRUE	Timaru	Bromus catharticus	Haloxyfop	250	5	0	5	0	0	1	Susceptible
240	981	449	EPSPS	Sonchus	TRUE	Timaru	Sonchus asper	Glyphosate	1458	7	0	7	0	0	1	Susceptible
240	981	606	ACCase	Bromus	TRUE	Timaru	Bromus catharticus	Clethodim	240	8	0	8	0	0	1	Susceptible
240	981	606	ACCase	Bromus	TRUE	Timaru	Bromus catharticus	Haloxyfop	250	10	0	10	0	0	1	Susceptible
240	981	606	ALS	Bromus	TRUE	Timaru	Bromus catharticus	Pyroxsulam	15	9	0	9	0	0	1	Susceptible
240	981	608	ACCase	Bromus	TRUE	Timaru	Bromus catharticus	Clethodim	240	14	0	14	0	0	1	Susceptible
240	981	608	ACCase	Bromus	TRUE	Timaru	Bromus catharticus	Haloxyfop	250	14	0	14	0	0	1	Susceptible
240	981	608	ALS	Bromus	TRUE	Timaru	Bromus catharticus	Pyroxsulam	15	13	0	13	0	0	1	Susceptible
240	981	609	ACCase	Bromus	TRUE	Timaru	Bromus catharticus	Clethodim	240	13	0	13	0	0	1	Susceptible
240	981	609	ACCase	Bromus	TRUE	Timaru	Bromus catharticus	Haloxyfop	250	10	0	10	0	0	1	Susceptible
240	981	609	ALS	Bromus	TRUE	Timaru	Bromus catharticus	Pyroxsulam	15	12	0	12	0	0	1	Susceptible
240	981	610	ACCase	Bromus	TRUE	Timaru	Bromus catharticus	Clethodim	240	10	0	10	0	0	1	Susceptible
240	981	610	ACCase	Bromus	TRUE	Timaru	Bromus catharticus	Haloxyfop	250	12	0	12	0	0	1	Susceptible
240	981	610	ALS	Bromus	TRUE	Timaru	Bromus catharticus	Pyroxsulam	15	12	0	12	0	0	1	Susceptible
297	1228	397	ACCase	Bromus	TRUE	Lincoln	Bromus hordeaceus	Clethodim	240	20	0	20	0	0	1	Susceptible
297	1228	397	ACCase	Bromus	TRUE	Lincoln	Bromus hordeaceus	Haloxyfop	250	20	0	20	0	0	1	Susceptible
297	1228	397	ALS	Bromus	TRUE	Lincoln	Bromus hordeaceus	Pyroxsulam	15	19	0	19	0	0	1	Susceptible
297	1228	397	EPSPS	Bromus	TRUE	Lincoln	Bromus hordeaceus	Glyphosate	540	20	0	20	0	0	1	Susceptible
297	1228	583	ACCase	Bromus	TRUE	Lincoln	Bromus hordeaceus	Clethodim	240	19	0	19	0	0	1	Susceptible
297	1228	583	ACCase	Bromus	TRUE	Lincoln	Bromus hordeaceus	Haloxyfop	250	19	0	19	0	0	1	Susceptible
297	1228	583	ALS	Bromus	TRUE	Lincoln	Bromus hordeaceus	Pyroxsulam	15	19	0	19	0	0	1	Susceptible
297	1228	583	EPSPS	Bromus	TRUE	Lincoln	Bromus hordeaceus	Glyphosate	540	20	0	20	0	0	1	Susceptible
297	1228	584	ACCase	Bromus	TRUE	Lincoln	Bromus hordeaceus	Clethodim	240	17	0	17	0	0	1	Susceptible
297	1228	584	ACCase	Bromus	TRUE	Lincoln	Bromus hordeaceus	Haloxyfop	250	19	0	19	0	0	1	Susceptible
297	1228	584	ALS	Bromus	TRUE	Lincoln	Bromus hordeaceus	Pyroxsulam	15	16	0	16	0	0	1	Susceptible
297	1228	584	EPSPS	Bromus	TRUE	Lincoln	Bromus hordeaceus	Glyphosate	540	16	0	16	0	0	1	Susceptible
297	1228	585	ACCase	Bromus	TRUE	Lincoln	Bromus hordeaceus	Clethodim	240	18	0	18	0	0	1	Susceptible
297	1228	585	ACCase	Bromus	TRUE	Lincoln	Bromus hordeaceus	Haloxyfop	250	19	0	19	0	0	1	Susceptible
297	1228	585	ALS	Bromus	TRUE	Lincoln	Bromus hordeaceus	Pyroxsulam	15	18	0	18	0	0	1	Susceptible
297	1228	585	EPSPS	Bromus	TRUE	Lincoln	Bromus hordeaceus	Glyphosate	540	19	0	19	0	0	1	Susceptible
297	1228	586	ACCase	Bromus	TRUE	Lincoln	Bromus hordeaceus	Clethodim	240	20	0	20	0	0	1	Susceptible
297	1228	586	ACCase	Bromus	TRUE	Lincoln	Bromus hordeaceus	Haloxyfop	250	19	0	19	0	0	1	Susceptible
297	1228	586	ALS	Bromus	TRUE	Lincoln	Bromus hordeaceus	Pyroxsulam	15	20	0	20	0	0	1	Susceptible
297	1228	586	EPSPS	Bromus	TRUE	Lincoln	Bromus hordeaceus	Glyphosate	540	19	0	19	0	0	1	Susceptible
297	1228	901	ACCase	Lolium	TRUE	Lincoln	Lolium perenne	Haloxyfop	60	20	0	20	0	0	1	Susceptible
297	1228	901	ACCase	Lolium	TRUE	Lincoln	Lolium perenne	Pinoxaden	30	14	0	14	0	0	1	Susceptible
297	1228	901	ALS	Lolium	TRUE	Lincoln	Lolium perenne	Iodosulfuron	7.5	18	0	18	0	0	1	Susceptible
297	1228	901	EPSPS	Lolium	TRUE	Lincoln	Lolium perenne	Glyphosate	1458	18	0	18	0	0	1	Susceptible
297	1228	902	ACCase	Lolium	TRUE	Lincoln	Lolium hybridum	Haloxyfop	60	7	0	7	0	0	1	Susceptible
297	1228	902	ACCase	Lolium	TRUE	Lincoln	Lolium hybridum	Pinoxaden	30	7	0	7	0	0	1	Susceptible
297	1228	903	ACCase	Lolium	TRUE	Lincoln	Lolium perenne	Haloxyfop	60	18	0	18	0	0	1	Susceptible
297	1228	903	ACCase	Lolium	TRUE	Lincoln	Lolium perenne	Pinoxaden	30	20	0	20	0	0	1	Susceptible
297	1228	903	ALS	Lolium	TRUE	Lincoln	Lolium perenne	Iodosulfuron	7.5	20	0	20	0	0	1	Susceptible
297	1228	903	EPSPS	Lolium	TRUE	Lincoln	Lolium perenne	Glyphosate	1458	20	0	20	0	0	1	Susceptible
309	2443	220	ACCase	Lolium	FALSE	Timaru	Lolium multiflorum	Clethodim	120	37	0	37	0	0	1	Susceptible
309	2443	220	ACCase	Lolium	FALSE	Timaru	Lolium multiflorum	Haloxyfop	60	20	6	14	30	1	1	Resistant
309	2443	220	ACCase	Lolium	FALSE	Timaru	Lolium multiflorum	Pinoxaden	30	18	0	18	0	0	1	Susceptible
309	2443	220	ALS	Lolium	FALSE	Timaru	Lolium multiflorum	Iodosulfuron	7.5	36	0	36	0	0	1	Susceptible
309	2443	220	ALS	Lolium	FALSE	Timaru	Lolium multiflorum	Pyroxsulam	15	36	11	25	31	1	1	Resistant
309	2443	220	EPSPS	Lolium	FALSE	Timaru	Lolium multiflorum	Glyphosate	1458	36	0	36	0	0	1	Susceptible
326	2522	121	ACCase	Phalaris	TRUE	Lincoln	Phalaris minor	Pinoxaden	30	5	0	5	0	0	1	Susceptible
326	2522	513	ALS	Sonchus	TRUE	Lincoln	Sonchus asper	Chlorsulfuron	15	15	15	0	100	1	1	Resistant
326	2522	513	EPSPS	Sonchus	TRUE	Lincoln	Sonchus asper	Glyphosate	1458	10	0	10	0	0	1	Susceptible
336	2553	797	ACCase	Avena	TRUE	Lincoln	Avena fatua	Fenoxaprop	51.75	15	0	15	0	0	1	Susceptible
336	2553	798	ACCase	Avena	TRUE	Lincoln	Avena fatua	Fenoxaprop	51.75	19	0	19	0	0	1	Susceptible
336	2553	801	ALS	Avena	TRUE	Lincoln	Avena fatua	Pyroxsulam	30	18	0	18	0	0	1	Susceptible
336	2553	802	ACCase	Avena	TRUE	Lincoln	Avena fatua	Fenoxaprop	51.75	15	0	15	0	0	1	Susceptible
357	2636	119	ACCase	Vulpia	TRUE	Lincoln	Vulpia bromoides	Clethodim	120	17	0	17	0	0	1	Susceptible
357	2636	119	EPSPS	Vulpia	TRUE	Lincoln	Vulpia bromoides	Glyphosate	1458	47	0	47	0	0	1	Susceptible
357	2636	120	EPSPS	Sonchus	TRUE	Lincoln	Sonchus oleraceus	Glyphosate	1458	6	0	6	0	0	1	Susceptible
369	2676	414	ACCase	Bromus	TRUE	Timaru	Bromus diandrus	Clethodim	120	14	0	14	0	0	1	Susceptible
369	2676	414	ACCase	Bromus	TRUE	Timaru	Bromus diandrus	Haloxyfop	250	12	0	12	0	0	1	Susceptible
369	2676	414	ALS	Bromus	TRUE	Timaru	Bromus diandrus	Pyroxsulam	15	15	0	15	0	0	1	Susceptible
369	2676	414	EPSPS	Bromus	TRUE	Timaru	Bromus diandrus	Glyphosate	540	14	0	14	0	0	1	Susceptible
369	2676	611	ACCase	Bromus	TRUE	Timaru	Bromus diandrus	Clethodim	120	12	0	12	0	0	1	Susceptible
369	2676	611	ACCase	Bromus	TRUE	Timaru	Bromus diandrus	Haloxyfop	250	15	0	15	0	0	1	Susceptible
369	2676	611	ALS	Bromus	TRUE	Timaru	Bromus diandrus	Pyroxsulam	15	13	0	13	0	0	1	Susceptible
369	2676	611	EPSPS	Bromus	TRUE	Timaru	Bromus diandrus	Glyphosate	540	15	0	15	0	0	1	Susceptible
369	2676	612	ACCase	Bromus	TRUE	Timaru	Bromus diandrus	Clethodim	120	13	0	13	0	0	1	Susceptible
369	2676	612	ACCase	Bromus	TRUE	Timaru	Bromus diandrus	Haloxyfop	250	14	0	14	0	0	1	Susceptible
369	2676	612	ALS	Bromus	TRUE	Timaru	Bromus diandrus	Pyroxsulam	15	14	0	14	0	0	1	Susceptible
369	2676	612	EPSPS	Bromus	TRUE	Timaru	Bromus diandrus	Glyphosate	540	13	0	13	0	0	1	Susceptible
369	2676	613	ACCase	Bromus	TRUE	Timaru	Bromus diandrus	Clethodim	120	15	0	15	0	0	1	Susceptible
369	2676	613	ACCase	Bromus	TRUE	Timaru	Bromus diandrus	Haloxyfop	250	13	0	13	0	0	1	Susceptible
369	2676	613	ALS	Bromus	TRUE	Timaru	Bromus diandrus	Pyroxsulam	15	14	0	14	0	0	1	Susceptible
369	2676	613	EPSPS	Bromus	TRUE	Timaru	Bromus diandrus	Glyphosate	540	15	0	15	0	0	1	Susceptible
369	2676	917	ACCase	Lolium	TRUE	Timaru	Lolium perenne	Pinoxaden	30	5	4	1	80	1	1	Resistant
369	2676	917	ALS	Lolium	TRUE	Timaru	Lolium perenne	Iodosulfuron	7.5	8	8	0	100	1	1	Resistant
369	2676	917	EPSPS	Lolium	TRUE	Timaru	Lolium perenne	Glyphosate	1458	5	0	5	0	0	1	Susceptible
369	2676	918	ACCase	Lolium	TRUE	Timaru	Lolium perenne	Haloxyfop	60	18	4	14	22	1	1	Resistant
369	2676	918	ACCase	Lolium	TRUE	Timaru	Lolium perenne	Pinoxaden	30	15	5	10	33	1	1	Resistant
369	2676	918	ALS	Lolium	TRUE	Timaru	Lolium perenne	Iodosulfuron	7.5	19	19	0	100	1	1	Resistant
369	2676	918	EPSPS	Lolium	TRUE	Timaru	Lolium perenne	Glyphosate	1458	18	0	18	0	0	1	Susceptible
369	2676	919	ACCase	Lolium	TRUE	Timaru	Lolium hybridum	Haloxyfop	60	12	3	9	25	0	1	Susceptible
369	2676	919	ACCase	Lolium	TRUE	Timaru	Lolium hybridum	Pinoxaden	30	10	9	1	90	1	1	Resistant
369	2676	919	ALS	Lolium	TRUE	Timaru	Lolium hybridum	Iodosulfuron	7.5	15	12	3	80	1	1	Resistant
369	2676	919	EPSPS	Lolium	TRUE	Timaru	Lolium hybridum	Glyphosate	1458	15	0	15	0	0	1	Susceptible
369	2676	921	ACCase	Lolium	TRUE	Timaru	Lolium multiflorum	Haloxyfop	125	6	5	1	83	1	1	Resistant
369	2676	921	ACCase	Lolium	TRUE	Timaru	Lolium multiflorum	Pinoxaden	30	10	9	1	90	1	1	Resistant
369	2676	921	ALS	Lolium	TRUE	Timaru	Lolium multiflorum	Iodosulfuron	7.5	8	8	0	100	1	1	Resistant
369	2676	922	ACCase	Lolium	TRUE	Timaru	Lolium multiflorum	Haloxyfop	60	17	12	5	71	1	1	Resistant
369	2676	922	ACCase	Lolium	TRUE	Timaru	Lolium multiflorum	Pinoxaden	30	18	14	4	78	1	1	Resistant
369	2676	922	ALS	Lolium	TRUE	Timaru	Lolium multiflorum	Iodosulfuron	7.5	18	15	3	83	1	1	Resistant
369	2676	922	EPSPS	Lolium	TRUE	Timaru	Lolium multiflorum	Glyphosate	1458	9	0	9	0	0	1	Susceptible
369	2676	923	ACCase	Lolium	TRUE	Timaru	Lolium perenne	Haloxyfop	60	19	9	10	47	1	1	Resistant
369	2676	923	ACCase	Lolium	TRUE	Timaru	Lolium perenne	Pinoxaden	30	17	0	17	0	0	1	Susceptible
369	2676	923	ALS	Lolium	TRUE	Timaru	Lolium perenne	Iodosulfuron	7.5	18	0	18	0	0	1	Susceptible
369	2676	923	EPSPS	Lolium	TRUE	Timaru	Lolium perenne	Glyphosate	1458	18	0	18	0	0	1	Susceptible
369	2676	924	ACCase	Lolium	TRUE	Timaru	Lolium multiflorum	Haloxyfop	125	17	17	0	100	1	1	Resistant
369	2676	924	ACCase	Lolium	TRUE	Timaru	Lolium multiflorum	Pinoxaden	30	17	11	6	65	1	1	Resistant
369	2676	924	ALS	Lolium	TRUE	Timaru	Lolium multiflorum	Iodosulfuron	7.5	17	10	7	59	1	1	Resistant
369	2676	924	EPSPS	Lolium	TRUE	Timaru	Lolium multiflorum	Glyphosate	1458	17	0	17	0	0	1	Susceptible
369	2676	925	ACCase	Lolium	TRUE	Timaru	Lolium multiflorum	Clethodim	120	14	0	14	0	0	1	Susceptible
369	2676	925	ACCase	Lolium	TRUE	Timaru	Lolium multiflorum	Haloxyfop	60	19	19	0	100	1	1	Resistant
369	2676	925	ALS	Lolium	TRUE	Timaru	Lolium multiflorum	Iodosulfuron	7.5	17	0	17	0	0	1	Susceptible
369	2676	925	ALS	Lolium	TRUE	Timaru	Lolium multiflorum	Pyroxsulam	15	15	12	3	80	1	1	Resistant
369	2676	925	EPSPS	Lolium	TRUE	Timaru	Lolium multiflorum	Glyphosate	1458	17	0	17	0	0	1	Susceptible
369	2676	926	ACCase	Lolium	TRUE	Timaru	Lolium multiflorum	Clethodim	120	18	0	18	0	0	1	Susceptible
369	2676	926	ACCase	Lolium	TRUE	Timaru	Lolium multiflorum	Haloxyfop	60	14	13	1	93	1	1	Resistant
369	2676	926	ACCase	Lolium	TRUE	Timaru	Lolium multiflorum	Pinoxaden	30	14	0	14	0	0	1	Susceptible
369	2676	926	ALS	Lolium	TRUE	Timaru	Lolium multiflorum	Iodosulfuron	7.5	15	0	15	0	0	1	Susceptible
369	2676	926	ALS	Lolium	TRUE	Timaru	Lolium multiflorum	Pyroxsulam	15	17	15	2	88	1	1	Resistant
369	2676	926	EPSPS	Lolium	TRUE	Timaru	Lolium multiflorum	Glyphosate	1458	17	0	17	0	0	1	Susceptible
369	2676	927	ACCase	Lolium	TRUE	Timaru	Lolium multiflorum	Clethodim	120	38	0	38	0	0	1	Susceptible
369	2676	927	ACCase	Lolium	TRUE	Timaru	Lolium multiflorum	Haloxyfop	125	19	11	8	58	1	1	Resistant
369	2676	927	ACCase	Lolium	TRUE	Timaru	Lolium multiflorum	Pinoxaden	30	15	11	4	73	1	1	Resistant
369	2676	927	ALS	Lolium	TRUE	Timaru	Lolium multiflorum	Iodosulfuron	7.5	16	2	14	12	0	1	Susceptible
369	2676	927	ALS	Lolium	TRUE	Timaru	Lolium multiflorum	Pyroxsulam	15	28	11	17	39	1	1	Resistant
369	2676	927	EPSPS	Lolium	TRUE	Timaru	Lolium multiflorum	Glyphosate	1458	25	0	25	0	0	1	Susceptible
369	2676	928	ACCase	Lolium	TRUE	Timaru	Lolium multiflorum	Haloxyfop	125	14	10	4	71	1	1	Resistant
369	2676	928	ACCase	Lolium	TRUE	Timaru	Lolium multiflorum	Pinoxaden	30	12	3	9	25	0	1	Susceptible
369	2676	928	ALS	Lolium	TRUE	Timaru	Lolium multiflorum	Iodosulfuron	7.5	14	4	10	29	1	1	Resistant
369	2676	928	EPSPS	Lolium	TRUE	Timaru	Lolium multiflorum	Glyphosate	1458	18	0	18	0	0	1	Susceptible
369	2676	929	EPSPS	Lolium	TRUE	Timaru	Lolium multiflorum	Glyphosate	1458	6	0	6	0	0	1	Susceptible
387	2755	460	ALS	Sonchus	TRUE	Timaru	Sonchus asper	Chlorsulfuron	15	19	19	0	100	1	1	Resistant
387	2755	460	EPSPS	Sonchus	TRUE	Timaru	Sonchus asper	Glyphosate	1458	18	0	18	0	0	1	Susceptible
387	2755	938	ACCase	Lolium	TRUE	Timaru	Lolium multiflorum	Haloxyfop	60	7	0	7	0	0	1	Susceptible
387	2755	938	ACCase	Lolium	TRUE	Timaru	Lolium multiflorum	Pinoxaden	30	5	0	5	0	0	1	Susceptible
387	2755	938	ALS	Lolium	TRUE	Timaru	Lolium multiflorum	Iodosulfuron	7.5	6	0	6	0	0	1	Susceptible
387	2755	938	EPSPS	Lolium	TRUE	Timaru	Lolium multiflorum	Glyphosate	1458	10	0	10	0	0	1	Susceptible
405	2844	723	ACCase	Avena	TRUE	Timaru	Avena fatua	Clethodim	120	14	0	14	0	0	1	Susceptible
405	2844	723	ACCase	Avena	TRUE	Timaru	Avena fatua	Fenoxaprop	51.75	14	0	14	0	0	1	Susceptible
405	2844	723	ACCase	Avena	TRUE	Timaru	Avena fatua	Pinoxaden	30	14	0	14	0	0	1	Susceptible
405	2844	723	ALS	Avena	TRUE	Timaru	Avena fatua	Pyroxsulam	30	7	0	7	0	0	1	Susceptible
405	2844	723	EPSPS	Avena	TRUE	Timaru	Avena fatua	Glyphosate	702	15	0	15	0	0	1	Susceptible
405	2844	724	ACCase	Avena	TRUE	Timaru	Avena fatua	Fenoxaprop	51.75	15	0	15	0	0	1	Susceptible
405	2844	724	ALS	Avena	TRUE	Timaru	Avena fatua	Pyroxsulam	30	8	0	8	0	0	1	Susceptible
405	2844	732	ACCase	Avena	TRUE	Timaru	Avena fatua	Fenoxaprop	51.75	15	0	15	0	0	1	Susceptible
405	2844	733	ACCase	Avena	TRUE	Timaru	Avena fatua	Fenoxaprop	51.75	14	0	14	0	0	1	Susceptible
405	2844	734	ACCase	Avena	TRUE	Timaru	Avena fatua	Fenoxaprop	51.75	13	0	13	0	0	1	Susceptible
405	2844	734	ALS	Avena	TRUE	Timaru	Avena fatua	Pyroxsulam	30	8	0	8	0	0	1	Susceptible
405	2844	738	ACCase	Avena	TRUE	Timaru	Avena fatua	Fenoxaprop	51.75	13	0	13	0	0	1	Susceptible
405	2844	739	ACCase	Avena	TRUE	Timaru	Avena fatua	Fenoxaprop	51.75	15	0	15	0	0	1	Susceptible
405	2844	969	ACCase	Lolium	TRUE	Timaru	Lolium multiflorum	Haloxyfop	125	9	0	9	0	0	1	Susceptible
405	2844	969	EPSPS	Lolium	TRUE	Timaru	Lolium multiflorum	Glyphosate	1458	5	0	5	0	0	1	Susceptible
405	2844	972	ACCase	Lolium	TRUE	Timaru	Lolium multiflorum	Pinoxaden	30	6	0	6	0	0	1	Susceptible
405	2844	972	ALS	Lolium	TRUE	Timaru	Lolium multiflorum	Iodosulfuron	7.5	6	1	5	17	0	1	Susceptible
405	2844	974	ACCase	Lolium	TRUE	Timaru	Lolium multiflorum	Clethodim	120	5	0	5	0	0	1	Susceptible
405	2844	980	ACCase	Lolium	TRUE	Timaru	Lolium perenne	Haloxyfop	60	16	0	16	0	0	1	Susceptible
405	2844	980	ACCase	Lolium	TRUE	Timaru	Lolium perenne	Pinoxaden	30	16	0	16	0	0	1	Susceptible
405	2844	980	ALS	Lolium	TRUE	Timaru	Lolium perenne	Iodosulfuron	7.5	20	0	20	0	0	1	Susceptible
405	2844	980	EPSPS	Lolium	TRUE	Timaru	Lolium perenne	Glyphosate	1458	16	0	16	0	0	1	Susceptible
406	2852	114	ACCase	Bromus	TRUE	Lincoln	Bromus catharticus	Clethodim	120	83	0	83	0	0	1	Susceptible
406	2852	114	ACCase	Bromus	TRUE	Lincoln	Bromus catharticus	Haloxyfop	60	80	0	80	0	0	1	Susceptible
406	2852	114	ALS	Bromus	TRUE	Lincoln	Bromus catharticus	Pyroxsulam	15	48	0	48	0	0	1	Susceptible
406	2852	114	EPSPS	Bromus	TRUE	Lincoln	Bromus catharticus	Glyphosate	1458	73	0	73	0	0	1	Susceptible
406	2852	115	ACCase	Bromus	TRUE	Lincoln	Bromus diandrus	Clethodim	120	15	0	15	0	0	1	Susceptible
406	2852	115	ACCase	Bromus	TRUE	Lincoln	Bromus diandrus	Haloxyfop	60	43	0	43	0	0	1	Susceptible
406	2852	115	ALS	Bromus	TRUE	Lincoln	Bromus diandrus	Pyroxsulam	15	21	0	21	0	0	1	Susceptible
406	2852	115	EPSPS	Bromus	TRUE	Lincoln	Bromus diandrus	Glyphosate	1458	104	0	104	0	0	1	Susceptible
406	2852	116	ACCase	Bromus	TRUE	Lincoln	Bromus hordeaceus	Clethodim	120	47	0	47	0	0	1	Susceptible
406	2852	116	ACCase	Bromus	TRUE	Lincoln	Bromus hordeaceus	Haloxyfop	60	81	0	81	0	0	1	Susceptible
406	2852	116	EPSPS	Bromus	TRUE	Lincoln	Bromus hordeaceus	Glyphosate	1458	47	0	47	0	0	1	Susceptible
406	2852	117	EPSPS	Sonchus	TRUE	Lincoln	Sonchus oleraceus	Glyphosate	1458	5	0	5	0	0	1	Susceptible
406	2852	118	ACCase	Avena	TRUE	Lincoln	Avena fatua	Clethodim	120	44	0	44	0	0	1	Susceptible
406	2852	118	ACCase	Avena	TRUE	Lincoln	Avena fatua	Fenoxaprop	51.75	47	0	47	0	0	1	Susceptible
406	2852	118	ACCase	Avena	TRUE	Lincoln	Avena fatua	Haloxyfop	52	11	0	11	0	0	1	Susceptible
406	2852	118	ACCase	Avena	TRUE	Lincoln	Avena fatua	Pinoxaden	25	10	0	10	0	0	1	Susceptible
406	2852	1755	ACCase	Bromus	TRUE	Lincoln	Bromus diandrus	Clethodim	120	13	0	13	0	0	1	Susceptible
406	2852	1755	ACCase	Bromus	TRUE	Lincoln	Bromus diandrus	Haloxyfop	250	15	0	15	0	0	1	Susceptible
406	2852	1755	ALS	Bromus	TRUE	Lincoln	Bromus diandrus	Pyroxsulam	15	15	0	15	0	0	1	Susceptible
406	2852	1755	EPSPS	Bromus	TRUE	Lincoln	Bromus diandrus	Glyphosate	540	11	0	11	0	0	1	Susceptible
407	2862	109	ACCase	Lolium	TRUE	Lincoln	Lolium perenne	Clethodim	120	22	0	22	0	0	1	Susceptible
407	2862	109	ACCase	Lolium	TRUE	Lincoln	Lolium perenne	Pinoxaden	30	26	0	26	0	0	1	Susceptible
407	2862	109	ALS	Lolium	TRUE	Lincoln	Lolium perenne	Iodosulfuron	7.5	23	0	23	0	0	1	Susceptible
407	2862	109	ALS	Lolium	TRUE	Lincoln	Lolium perenne	Pyroxsulam	15	37	5	32	14	1	1	Resistant
407	2862	109	EPSPS	Lolium	TRUE	Lincoln	Lolium perenne	Glyphosate	1458	20	0	20	0	0	1	Susceptible
407	2862	110	ACCase	Avena	TRUE	Lincoln	Avena fatua	Clethodim	120	47	0	47	0	0	1	Susceptible
407	2862	110	ACCase	Avena	TRUE	Lincoln	Avena fatua	Fenoxaprop	51.75	42	0	42	0	0	1	Susceptible
407	2862	110	ACCase	Avena	TRUE	Lincoln	Avena fatua	Haloxyfop	52	10	0	10	0	0	1	Susceptible
407	2862	110	ACCase	Avena	TRUE	Lincoln	Avena fatua	Pinoxaden	25	9	0	9	0	0	1	Susceptible
407	2862	110	EPSPS	Avena	TRUE	Lincoln	Avena fatua	Glyphosate	1458	25	0	25	0	0	1	Susceptible
407	2862	112	ACCase	Lolium	TRUE	Lincoln	Lolium perenne	Clethodim	120	6	0	6	0	0	1	Susceptible
407	2862	112	ACCase	Lolium	TRUE	Lincoln	Lolium perenne	Haloxyfop	60	67	1	66	1	0	1	Susceptible
407	2862	112	ALS	Lolium	TRUE	Lincoln	Lolium perenne	Iodosulfuron	7.5	14	0	14	0	0	1	Susceptible
407	2862	112	EPSPS	Lolium	TRUE	Lincoln	Lolium perenne	Glyphosate	1458	8	0	8	0	0	1	Susceptible
407	2862	113	ACCase	Avena	TRUE	Lincoln	Avena fatua	Haloxyfop	52	8	0	8	0	0	1	Susceptible
407	2862	113	ACCase	Avena	TRUE	Lincoln	Avena fatua	Pinoxaden	25	10	0	10	0	0	1	Susceptible
407	2862	113	ACCase	Avena	TRUE	Lincoln	Avena fatua	Pinoxaden	30	7	0	7	0	0	1	Susceptible
407	2862	113	ALS	Avena	TRUE	Lincoln	Avena fatua	Pyroxsulam	15	12	0	12	0	0	1	Susceptible
407	2862	113	EPSPS	Avena	TRUE	Lincoln	Avena fatua	Glyphosate	1458	10	0	10	0	0	1	Susceptible
409	2867	107	ACCase	Phalaris	TRUE	Lincoln	Phalaris minor	Clethodim	120	5	0	5	0	0	1	Susceptible
409	2867	107	ACCase	Phalaris	TRUE	Lincoln	Phalaris minor	Haloxyfop	60	7	0	7	0	0	1	Susceptible
409	2867	107	ACCase	Phalaris	TRUE	Lincoln	Phalaris minor	Pinoxaden	30	15	0	15	0	0	1	Susceptible
409	2867	107	ALS	Phalaris	TRUE	Lincoln	Phalaris minor	Iodosulfuron	7.5	7	0	7	0	0	1	Susceptible
409	2867	107	EPSPS	Phalaris	TRUE	Lincoln	Phalaris minor	Glyphosate	1458	6	0	6	0	0	1	Susceptible
409	2867	108	ACCase	Bromus	TRUE	Lincoln	Bromus diandrus	Clethodim	120	25	0	25	0	0	1	Susceptible
409	2867	108	ACCase	Bromus	TRUE	Lincoln	Bromus diandrus	Haloxyfop	60	49	0	49	0	0	1	Susceptible
409	2867	108	ALS	Bromus	TRUE	Lincoln	Bromus diandrus	Pyroxsulam	15	20	0	20	0	0	1	Susceptible
409	2867	108	EPSPS	Bromus	TRUE	Lincoln	Bromus diandrus	Glyphosate	1458	32	0	32	0	0	1	Susceptible
414	2880	239	ACCase	Lolium	FALSE	Timaru	Lolium multiflorum	Haloxyfop	125	11	0	11	0	0	1	Susceptible
414	2880	239	ALS	Lolium	FALSE	Timaru	Lolium multiflorum	Pyroxsulam	15	7	0	7	0	0	1	Susceptible
414	2880	241	ACCase	Lolium	FALSE	Timaru	Lolium multiflorum	Pinoxaden	30	5	0	5	0	0	1	Susceptible
414	2880	242	ACCase	Lolium	FALSE	Timaru	Lolium multiflorum	Haloxyfop	125	9	0	9	0	0	1	Susceptible
414	2880	242	ACCase	Lolium	FALSE	Timaru	Lolium multiflorum	Pinoxaden	30	7	0	7	0	0	1	Susceptible
414	2880	408	ACCase	Bromus	TRUE	Timaru	Bromus diandrus	Clethodim	120	14	0	14	0	0	1	Susceptible
414	2880	408	ACCase	Bromus	TRUE	Timaru	Bromus diandrus	Haloxyfop	250	13	0	13	0	0	1	Susceptible
414	2880	408	ALS	Bromus	TRUE	Timaru	Bromus diandrus	Pyroxsulam	15	15	0	15	0	0	1	Susceptible
414	2880	408	EPSPS	Bromus	TRUE	Timaru	Bromus diandrus	Glyphosate	540	15	0	15	0	0	1	Susceptible
414	2880	411	ACCase	Bromus	TRUE	Timaru	Bromus diandrus	Clethodim	120	15	0	15	0	0	1	Susceptible
414	2880	411	ACCase	Bromus	TRUE	Timaru	Bromus diandrus	Haloxyfop	250	14	0	14	0	0	1	Susceptible
414	2880	411	ALS	Bromus	TRUE	Timaru	Bromus diandrus	Pyroxsulam	15	12	0	12	0	0	1	Susceptible
414	2880	411	EPSPS	Bromus	TRUE	Timaru	Bromus diandrus	Glyphosate	540	13	0	13	0	0	1	Susceptible
414	2880	436	ACCase	Phalaris	TRUE	Timaru	Phalaris minor	Clethodim	240	15	0	15	0	0	1	Susceptible
414	2880	436	ACCase	Phalaris	TRUE	Timaru	Phalaris minor	Pinoxaden	30	10	0	10	0	0	1	Susceptible
414	2880	436	ALS	Phalaris	TRUE	Timaru	Phalaris minor	Clodinafop	24	17	0	17	0	0	1	Susceptible
414	2880	436	ALS	Phalaris	TRUE	Timaru	Phalaris minor	Iodosulfuron	7.5	13	13	0	100	1	1	Resistant
414	2880	436	EPSPS	Phalaris	TRUE	Timaru	Phalaris minor	Glyphosate	702	16	0	16	0	0	1	Susceptible
414	2880	618	ACCase	Bromus	TRUE	Timaru	Bromus diandrus	Clethodim	120	15	0	15	0	0	1	Susceptible
414	2880	618	ACCase	Bromus	TRUE	Timaru	Bromus diandrus	Haloxyfop	250	14	0	14	0	0	1	Susceptible
414	2880	618	ALS	Bromus	TRUE	Timaru	Bromus diandrus	Pyroxsulam	15	12	0	12	0	0	1	Susceptible
414	2880	618	EPSPS	Bromus	TRUE	Timaru	Bromus diandrus	Glyphosate	540	14	0	14	0	0	1	Susceptible
414	2880	619	ACCase	Bromus	TRUE	Timaru	Bromus diandrus	Clethodim	120	14	0	14	0	0	1	Susceptible
414	2880	619	ACCase	Bromus	TRUE	Timaru	Bromus diandrus	Haloxyfop	250	14	0	14	0	0	1	Susceptible
414	2880	619	ALS	Bromus	TRUE	Timaru	Bromus diandrus	Pyroxsulam	15	15	0	15	0	0	1	Susceptible
414	2880	619	EPSPS	Bromus	TRUE	Timaru	Bromus diandrus	Glyphosate	540	15	0	15	0	0	1	Susceptible
414	2880	624	ACCase	Bromus	TRUE	Timaru	Bromus diandrus	Clethodim	120	9	0	9	0	0	1	Susceptible
414	2880	624	ACCase	Bromus	TRUE	Timaru	Bromus diandrus	Haloxyfop	250	8	0	8	0	0	1	Susceptible
414	2880	624	ALS	Bromus	TRUE	Timaru	Bromus diandrus	Pyroxsulam	15	10	0	10	0	0	1	Susceptible
414	2880	624	EPSPS	Bromus	TRUE	Timaru	Bromus diandrus	Glyphosate	540	10	0	10	0	0	1	Susceptible
414	2880	947	ACCase	Lolium	TRUE	Timaru	Lolium hybridum	Clethodim	120	8	0	8	0	0	1	Susceptible
414	2880	947	ACCase	Lolium	TRUE	Timaru	Lolium hybridum	Haloxyfop	60	10	0	10	0	0	1	Susceptible
414	2880	947	ACCase	Lolium	TRUE	Timaru	Lolium hybridum	Pinoxaden	30	19	0	19	0	0	1	Susceptible
414	2880	947	ALS	Lolium	TRUE	Timaru	Lolium hybridum	Iodosulfuron	7.5	9	0	9	0	0	1	Susceptible
414	2880	947	ALS	Lolium	TRUE	Timaru	Lolium hybridum	Pyroxsulam	15	20	1	19	5	0	1	Susceptible
414	2880	947	EPSPS	Lolium	TRUE	Timaru	Lolium hybridum	Glyphosate	1458	10	0	10	0	0	1	Susceptible
414	2880	948	ACCase	Lolium	TRUE	Timaru	Lolium multiflorum	Clethodim	120	32	0	32	0	0	1	Susceptible
414	2880	948	ACCase	Lolium	TRUE	Timaru	Lolium multiflorum	Haloxyfop	125	20	0	20	0	0	1	Susceptible
414	2880	948	ACCase	Lolium	TRUE	Timaru	Lolium multiflorum	Pinoxaden	30	15	0	15	0	0	1	Susceptible
414	2880	948	ALS	Lolium	TRUE	Timaru	Lolium multiflorum	Iodosulfuron	7.5	15	0	15	0	0	1	Susceptible
414	2880	948	ALS	Lolium	TRUE	Timaru	Lolium multiflorum	Pyroxsulam	15	28	13	15	46	1	1	Resistant
414	2880	948	EPSPS	Lolium	TRUE	Timaru	Lolium multiflorum	Glyphosate	1458	33	0	33	0	0	1	Susceptible
414	2880	949	ACCase	Lolium	TRUE	Timaru	Lolium multiflorum	Clethodim	120	36	0	36	0	0	1	Susceptible
414	2880	949	ACCase	Lolium	TRUE	Timaru	Lolium multiflorum	Haloxyfop	125	17	0	17	0	0	1	Susceptible
414	2880	949	ACCase	Lolium	TRUE	Timaru	Lolium multiflorum	Pinoxaden	30	13	0	13	0	0	1	Susceptible
414	2880	949	ALS	Lolium	TRUE	Timaru	Lolium multiflorum	Iodosulfuron	7.5	15	0	15	0	0	1	Susceptible
414	2880	949	ALS	Lolium	TRUE	Timaru	Lolium multiflorum	Pyroxsulam	15	14	0	14	0	0	1	Susceptible
414	2880	949	EPSPS	Lolium	TRUE	Timaru	Lolium multiflorum	Glyphosate	1458	34	0	34	0	0	1	Susceptible
414	2880	950	ACCase	Lolium	TRUE	Timaru	Lolium multiflorum	Clethodim	120	18	0	18	0	0	1	Susceptible
414	2880	950	ACCase	Lolium	TRUE	Timaru	Lolium multiflorum	Haloxyfop	60	20	0	20	0	0	1	Susceptible
414	2880	950	ACCase	Lolium	TRUE	Timaru	Lolium multiflorum	Pinoxaden	30	19	0	19	0	0	1	Susceptible
414	2880	950	ALS	Lolium	TRUE	Timaru	Lolium multiflorum	Iodosulfuron	7.5	19	0	19	0	0	1	Susceptible
414	2880	950	ALS	Lolium	TRUE	Timaru	Lolium multiflorum	Pyroxsulam	15	20	6	14	30	1	1	Resistant
414	2880	950	EPSPS	Lolium	TRUE	Timaru	Lolium multiflorum	Glyphosate	1458	19	0	19	0	0	1	Susceptible
414	2880	951	ACCase	Lolium	TRUE	Timaru	Lolium multiflorum	Clethodim	120	36	0	36	0	0	1	Susceptible
414	2880	951	ACCase	Lolium	TRUE	Timaru	Lolium multiflorum	Haloxyfop	125	18	0	18	0	0	1	Susceptible
414	2880	951	ACCase	Lolium	TRUE	Timaru	Lolium multiflorum	Pinoxaden	30	11	0	11	0	0	1	Susceptible
414	2880	951	ALS	Lolium	TRUE	Timaru	Lolium multiflorum	Iodosulfuron	7.5	11	0	11	0	0	1	Susceptible
414	2880	951	ALS	Lolium	TRUE	Timaru	Lolium multiflorum	Pyroxsulam	15	21	0	21	0	0	1	Susceptible
414	2880	951	EPSPS	Lolium	TRUE	Timaru	Lolium multiflorum	Glyphosate	1458	29	0	29	0	0	1	Susceptible
414	2880	952	ACCase	Lolium	TRUE	Timaru	Lolium multiflorum	Clethodim	120	34	0	34	0	0	1	Susceptible
414	2880	952	ACCase	Lolium	TRUE	Timaru	Lolium multiflorum	Haloxyfop	125	18	0	18	0	0	1	Susceptible
414	2880	952	ACCase	Lolium	TRUE	Timaru	Lolium multiflorum	Pinoxaden	30	15	0	15	0	0	1	Susceptible
414	2880	952	ALS	Lolium	TRUE	Timaru	Lolium multiflorum	Iodosulfuron	7.5	16	0	16	0	0	1	Susceptible
414	2880	952	ALS	Lolium	TRUE	Timaru	Lolium multiflorum	Pyroxsulam	15	12	0	12	0	0	1	Susceptible
414	2880	952	EPSPS	Lolium	TRUE	Timaru	Lolium multiflorum	Glyphosate	1458	27	0	27	0	0	1	Susceptible
414	2880	953	ACCase	Lolium	TRUE	Timaru	Lolium multiflorum	Clethodim	120	40	0	40	0	0	1	Susceptible
414	2880	953	ACCase	Lolium	TRUE	Timaru	Lolium multiflorum	Haloxyfop	125	18	0	18	0	0	1	Susceptible
414	2880	953	ACCase	Lolium	TRUE	Timaru	Lolium multiflorum	Pinoxaden	30	12	0	12	0	0	1	Susceptible
414	2880	953	ALS	Lolium	TRUE	Timaru	Lolium multiflorum	Iodosulfuron	7.5	18	0	18	0	0	1	Susceptible
414	2880	953	ALS	Lolium	TRUE	Timaru	Lolium multiflorum	Pyroxsulam	15	30	4	26	13	1	1	Resistant
414	2880	953	EPSPS	Lolium	TRUE	Timaru	Lolium multiflorum	Glyphosate	1458	39	0	39	0	0	1	Susceptible
414	2880	954	ACCase	Lolium	TRUE	Timaru	Lolium multiflorum	Clethodim	120	38	0	38	0	0	1	Susceptible
414	2880	954	ACCase	Lolium	TRUE	Timaru	Lolium multiflorum	Haloxyfop	125	19	0	19	0	0	1	Susceptible
414	2880	954	ACCase	Lolium	TRUE	Timaru	Lolium multiflorum	Pinoxaden	30	17	0	17	0	0	1	Susceptible
414	2880	954	ALS	Lolium	TRUE	Timaru	Lolium multiflorum	Iodosulfuron	7.5	11	0	11	0	0	1	Susceptible
414	2880	954	ALS	Lolium	TRUE	Timaru	Lolium multiflorum	Pyroxsulam	15	10	0	10	0	0	1	Susceptible
414	2880	954	EPSPS	Lolium	TRUE	Timaru	Lolium multiflorum	Glyphosate	1458	26	0	26	0	0	1	Susceptible
414	2880	955	ACCase	Lolium	TRUE	Timaru	Lolium multiflorum	Clethodim	120	17	0	17	0	0	1	Susceptible
414	2880	955	ACCase	Lolium	TRUE	Timaru	Lolium multiflorum	Haloxyfop	60	13	0	13	0	0	1	Susceptible
414	2880	955	ACCase	Lolium	TRUE	Timaru	Lolium multiflorum	Pinoxaden	30	20	0	20	0	0	1	Susceptible
414	2880	955	ALS	Lolium	TRUE	Timaru	Lolium multiflorum	Iodosulfuron	7.5	19	0	19	0	0	1	Susceptible
414	2880	955	EPSPS	Lolium	TRUE	Timaru	Lolium multiflorum	Glyphosate	1458	19	0	19	0	0	1	Susceptible
414	2880	956	ACCase	Lolium	TRUE	Timaru	Lolium multiflorum	Clethodim	120	30	0	30	0	0	1	Susceptible
414	2880	956	ACCase	Lolium	TRUE	Timaru	Lolium multiflorum	Haloxyfop	125	16	0	16	0	0	1	Susceptible
414	2880	956	ACCase	Lolium	TRUE	Timaru	Lolium multiflorum	Pinoxaden	30	13	0	13	0	0	1	Susceptible
414	2880	956	ALS	Lolium	TRUE	Timaru	Lolium multiflorum	Iodosulfuron	7.5	9	0	9	0	0	1	Susceptible
414	2880	956	EPSPS	Lolium	TRUE	Timaru	Lolium multiflorum	Glyphosate	1458	35	0	35	0	0	1	Susceptible
414	2880	958	ACCase	Lolium	TRUE	Timaru	Lolium multiflorum	Haloxyfop	60	18	0	18	0	0	1	Susceptible
414	2880	958	ACCase	Lolium	TRUE	Timaru	Lolium multiflorum	Pinoxaden	30	16	0	16	0	0	1	Susceptible
414	2880	958	ALS	Lolium	TRUE	Timaru	Lolium multiflorum	Iodosulfuron	7.5	19	0	19	0	0	1	Susceptible
414	2880	958	EPSPS	Lolium	TRUE	Timaru	Lolium multiflorum	Glyphosate	1458	19	0	19	0	0	1	Susceptible
414	2880	959	ACCase	Lolium	TRUE	Timaru	Lolium multiflorum	Haloxyfop	125	16	0	16	0	0	1	Susceptible
414	2880	959	ALS	Lolium	TRUE	Timaru	Lolium multiflorum	Iodosulfuron	7.5	17	0	17	0	0	1	Susceptible
414	2880	959	EPSPS	Lolium	TRUE	Timaru	Lolium multiflorum	Glyphosate	1458	9	0	9	0	0	1	Susceptible
414	2880	960	ACCase	Lolium	TRUE	Timaru	Lolium multiflorum	Haloxyfop	125	17	0	17	0	0	1	Susceptible
414	2880	960	ACCase	Lolium	TRUE	Timaru	Lolium multiflorum	Pinoxaden	30	19	0	19	0	0	1	Susceptible
414	2880	960	ALS	Lolium	TRUE	Timaru	Lolium multiflorum	Iodosulfuron	7.5	18	4	14	22	1	1	Resistant
414	2880	960	EPSPS	Lolium	TRUE	Timaru	Lolium multiflorum	Glyphosate	1458	16	0	16	0	0	1	Susceptible
414	2880	961	ACCase	Lolium	TRUE	Timaru	Lolium multiflorum	Clethodim	120	18	0	18	0	0	1	Susceptible
414	2880	961	ACCase	Lolium	TRUE	Timaru	Lolium multiflorum	Haloxyfop	60	18	0	18	0	0	1	Susceptible
414	2880	961	ACCase	Lolium	TRUE	Timaru	Lolium multiflorum	Pinoxaden	30	18	0	18	0	0	1	Susceptible
414	2880	961	ALS	Lolium	TRUE	Timaru	Lolium multiflorum	Iodosulfuron	7.5	19	0	19	0	0	1	Susceptible
414	2880	961	ALS	Lolium	TRUE	Timaru	Lolium multiflorum	Pyroxsulam	15	18	0	18	0	0	1	Susceptible
414	2880	961	EPSPS	Lolium	TRUE	Timaru	Lolium multiflorum	Glyphosate	1458	18	0	18	0	0	1	Susceptible
414	2880	962	ACCase	Lolium	TRUE	Timaru	Lolium multiflorum	Haloxyfop	125	13	0	13	0	0	1	Susceptible
414	2880	962	ACCase	Lolium	TRUE	Timaru	Lolium multiflorum	Pinoxaden	30	16	0	16	0	0	1	Susceptible
414	2880	962	ALS	Lolium	TRUE	Timaru	Lolium multiflorum	Iodosulfuron	7.5	16	1	15	6	0	1	Susceptible
414	2880	962	EPSPS	Lolium	TRUE	Timaru	Lolium multiflorum	Glyphosate	1458	18	0	18	0	0	1	Susceptible
414	2880	963	ACCase	Lolium	TRUE	Timaru	Lolium multiflorum	Haloxyfop	125	17	0	17	0	0	1	Susceptible
414	2880	963	ACCase	Lolium	TRUE	Timaru	Lolium multiflorum	Pinoxaden	30	19	0	19	0	0	1	Susceptible
414	2880	963	ALS	Lolium	TRUE	Timaru	Lolium multiflorum	Iodosulfuron	7.5	17	3	14	18	0	1	Susceptible
414	2880	963	EPSPS	Lolium	TRUE	Timaru	Lolium multiflorum	Glyphosate	1458	15	0	15	0	0	1	Susceptible
414	2880	964	ACCase	Lolium	TRUE	Timaru	Lolium multiflorum	Clethodim	120	19	0	19	0	0	1	Susceptible
414	2880	964	ACCase	Lolium	TRUE	Timaru	Lolium multiflorum	Haloxyfop	60	19	0	19	0	0	1	Susceptible
414	2880	964	ACCase	Lolium	TRUE	Timaru	Lolium multiflorum	Pinoxaden	30	18	0	18	0	0	1	Susceptible
414	2880	964	ALS	Lolium	TRUE	Timaru	Lolium multiflorum	Iodosulfuron	7.5	20	0	20	0	0	1	Susceptible
414	2880	964	EPSPS	Lolium	TRUE	Timaru	Lolium multiflorum	Glyphosate	1458	20	0	20	0	0	1	Susceptible
414	2880	965	ACCase	Lolium	TRUE	Timaru	Lolium multiflorum	Haloxyfop	125	14	0	14	0	0	1	Susceptible
414	2880	965	ACCase	Lolium	TRUE	Timaru	Lolium multiflorum	Pinoxaden	30	15	0	15	0	0	1	Susceptible
414	2880	965	ALS	Lolium	TRUE	Timaru	Lolium multiflorum	Iodosulfuron	7.5	15	0	15	0	0	1	Susceptible
414	2880	965	EPSPS	Lolium	TRUE	Timaru	Lolium multiflorum	Glyphosate	1458	14	0	14	0	0	1	Susceptible
414	2880	966	ACCase	Lolium	TRUE	Timaru	Lolium multiflorum	Haloxyfop	125	11	0	11	0	0	1	Susceptible
414	2880	966	ACCase	Lolium	TRUE	Timaru	Lolium multiflorum	Pinoxaden	30	12	0	12	0	0	1	Susceptible
414	2880	966	ALS	Lolium	TRUE	Timaru	Lolium multiflorum	Iodosulfuron	7.5	12	0	12	0	0	1	Susceptible
414	2880	966	EPSPS	Lolium	TRUE	Timaru	Lolium multiflorum	Glyphosate	1458	11	0	11	0	0	1	Susceptible
414	2880	967	ACCase	Lolium	TRUE	Timaru	Lolium multiflorum	Haloxyfop	125	14	0	14	0	0	1	Susceptible
414	2880	967	ACCase	Lolium	TRUE	Timaru	Lolium multiflorum	Pinoxaden	30	20	0	20	0	0	1	Susceptible
414	2880	967	ALS	Lolium	TRUE	Timaru	Lolium multiflorum	Iodosulfuron	7.5	19	1	18	5	0	1	Susceptible
414	2880	967	EPSPS	Lolium	TRUE	Timaru	Lolium multiflorum	Glyphosate	1458	15	0	15	0	0	1	Susceptible
419	2900	104	ACCase	Avena	TRUE	Lincoln	Avena fatua	Clethodim	120	46	0	46	0	0	1	Susceptible
419	2900	104	ACCase	Avena	TRUE	Lincoln	Avena fatua	Fenoxaprop	51.75	46	0	46	0	0	1	Susceptible
419	2900	104	ACCase	Avena	TRUE	Lincoln	Avena fatua	Haloxyfop	52	8	0	8	0	0	1	Susceptible
419	2900	104	ACCase	Avena	TRUE	Lincoln	Avena fatua	Pinoxaden	25	11	0	11	0	0	1	Susceptible
419	2900	105	ACCase	Lolium	TRUE	Lincoln	Lolium perenne	Clethodim	120	5	0	5	0	0	1	Susceptible
419	2900	105	ACCase	Lolium	TRUE	Lincoln	Lolium perenne	Haloxyfop	60	7	0	7	0	0	1	Susceptible
419	2900	105	ACCase	Lolium	TRUE	Lincoln	Lolium perenne	Pinoxaden	30	9	0	9	0	0	1	Susceptible
419	2900	105	ALS	Lolium	TRUE	Lincoln	Lolium perenne	Iodosulfuron	7.5	6	0	6	0	0	1	Susceptible
419	2900	105	ALS	Lolium	TRUE	Lincoln	Lolium perenne	Pyroxsulam	15	14	1	13	7	0	1	Susceptible
419	2900	105	EPSPS	Lolium	TRUE	Lincoln	Lolium perenne	Glyphosate	1458	7	0	7	0	0	1	Susceptible
419	2900	106	ACCase	Avena	TRUE	Lincoln	Avena fatua	Clethodim	120	43	0	43	0	0	1	Susceptible
419	2900	106	ACCase	Avena	TRUE	Lincoln	Avena fatua	Fenoxaprop	51.75	46	0	46	0	0	1	Susceptible
419	2900	106	ACCase	Avena	TRUE	Lincoln	Avena fatua	Haloxyfop	52	10	0	10	0	0	1	Susceptible
419	2900	106	ACCase	Avena	TRUE	Lincoln	Avena fatua	Pinoxaden	25	11	0	11	0	0	1	Susceptible
454	3119	100	ACCase	Lolium	TRUE	Lincoln	Lolium perenne	Clethodim	120	6	0	6	0	0	1	Susceptible
454	3119	100	ACCase	Lolium	TRUE	Lincoln	Lolium perenne	Haloxyfop	60	8	1	7	12	0	1	Susceptible
454	3119	100	ACCase	Lolium	TRUE	Lincoln	Lolium perenne	Pinoxaden	30	20	0	20	0	0	1	Susceptible
454	3119	100	ALS	Lolium	TRUE	Lincoln	Lolium perenne	Iodosulfuron	7.5	13	0	13	0	0	1	Susceptible
454	3119	100	ALS	Lolium	TRUE	Lincoln	Lolium perenne	Pyroxsulam	15	7	0	7	0	0	1	Susceptible
454	3119	100	EPSPS	Lolium	TRUE	Lincoln	Lolium perenne	Glyphosate	1458	21	0	21	0	0	1	Susceptible
454	3119	101	ACCase	Bromus	TRUE	Lincoln	Bromus hordeaceus	Haloxyfop	60	135	0	135	0	0	1	Susceptible
454	3119	101	EPSPS	Bromus	TRUE	Lincoln	Bromus hordeaceus	Glyphosate	1458	106	0	106	0	0	1	Susceptible
454	3119	102	ACCase	Bromus	TRUE	Lincoln	Bromus catharticus	Clethodim	120	94	0	94	0	0	1	Susceptible
454	3119	102	ACCase	Bromus	TRUE	Lincoln	Bromus catharticus	Haloxyfop	60	101	0	101	0	0	1	Susceptible
454	3119	102	ALS	Bromus	TRUE	Lincoln	Bromus catharticus	Pyroxsulam	15	60	0	60	0	0	1	Susceptible
454	3119	102	EPSPS	Bromus	TRUE	Lincoln	Bromus catharticus	Glyphosate	1458	107	0	107	0	0	1	Susceptible
454	3119	103	ACCase	Bromus	TRUE	Lincoln	Bromus hordeaceus	Clethodim	120	69	0	69	0	0	1	Susceptible
454	3119	103	ACCase	Bromus	TRUE	Lincoln	Bromus hordeaceus	Haloxyfop	60	140	0	140	0	0	1	Susceptible
454	3119	103	EPSPS	Bromus	TRUE	Lincoln	Bromus hordeaceus	Glyphosate	1458	112	0	112	0	0	1	Susceptible
481	1398	884	ACCase	Lolium	TRUE	Timaru	Lolium multiflorum	Haloxyfop	125	6	5	1	83	1	1	Resistant
481	1398	884	ACCase	Lolium	TRUE	Timaru	Lolium multiflorum	Pinoxaden	30	7	0	7	0	0	1	Susceptible
481	1398	884	ALS	Lolium	TRUE	Timaru	Lolium multiflorum	Iodosulfuron	7.5	5	0	5	0	0	1	Susceptible
481	1398	884	EPSPS	Lolium	TRUE	Timaru	Lolium multiflorum	Glyphosate	1458	9	0	9	0	0	1	Susceptible
481	1398	885	ACCase	Lolium	TRUE	Timaru	Lolium multiflorum	Haloxyfop	125	9	5	4	56	1	1	Resistant
481	1398	885	ACCase	Lolium	TRUE	Timaru	Lolium multiflorum	Pinoxaden	30	8	6	2	75	1	1	Resistant
481	1398	885	ALS	Lolium	TRUE	Timaru	Lolium multiflorum	Iodosulfuron	7.5	8	1	7	12	0	1	Susceptible
481	1398	885	EPSPS	Lolium	TRUE	Timaru	Lolium multiflorum	Glyphosate	1458	9	0	9	0	0	1	Susceptible
481	1398	886	ACCase	Lolium	TRUE	Timaru	Lolium multiflorum	Clethodim	120	14	0	14	0	0	1	Susceptible
481	1398	886	ACCase	Lolium	TRUE	Timaru	Lolium multiflorum	Haloxyfop	60	8	4	4	50	1	1	Resistant
481	1398	886	ACCase	Lolium	TRUE	Timaru	Lolium multiflorum	Pinoxaden	30	6	3	3	50	0	1	Susceptible
481	1398	886	ALS	Lolium	TRUE	Timaru	Lolium multiflorum	Iodosulfuron	7.5	11	0	11	0	0	1	Susceptible
481	1398	886	ALS	Lolium	TRUE	Timaru	Lolium multiflorum	Pyroxsulam	15	12	7	5	58	1	1	Resistant
481	1398	886	EPSPS	Lolium	TRUE	Timaru	Lolium multiflorum	Glyphosate	1458	11	0	11	0	0	1	Susceptible
481	1398	887	ACCase	Lolium	TRUE	Timaru	Lolium multiflorum	Haloxyfop	125	16	0	16	0	0	1	Susceptible
481	1398	887	ACCase	Lolium	TRUE	Timaru	Lolium multiflorum	Pinoxaden	30	15	2	13	13	0	1	Susceptible
481	1398	887	ALS	Lolium	TRUE	Timaru	Lolium multiflorum	Iodosulfuron	7.5	16	0	16	0	0	1	Susceptible
481	1398	887	EPSPS	Lolium	TRUE	Timaru	Lolium multiflorum	Glyphosate	1458	19	0	19	0	0	1	Susceptible
481	1398	888	ACCase	Lolium	TRUE	Timaru	Lolium multiflorum	Clethodim	120	14	0	14	0	0	1	Susceptible
481	1398	888	ACCase	Lolium	TRUE	Timaru	Lolium multiflorum	Haloxyfop	60	12	8	4	67	1	1	Resistant
481	1398	888	ALS	Lolium	TRUE	Timaru	Lolium multiflorum	Iodosulfuron	7.5	12	0	12	0	0	1	Susceptible
481	1398	888	ALS	Lolium	TRUE	Timaru	Lolium multiflorum	Pyroxsulam	15	13	6	7	46	1	1	Resistant
481	1398	888	EPSPS	Lolium	TRUE	Timaru	Lolium multiflorum	Glyphosate	1458	10	0	10	0	0	1	Susceptible
481	1398	893	ACCase	Lolium	TRUE	Timaru	Lolium multiflorum	Haloxyfop	125	13	7	6	54	1	1	Resistant
481	1398	893	ACCase	Lolium	TRUE	Timaru	Lolium multiflorum	Pinoxaden	30	7	5	2	71	1	1	Resistant
481	1398	893	ALS	Lolium	TRUE	Timaru	Lolium multiflorum	Iodosulfuron	7.5	12	0	12	0	0	1	Susceptible
481	1398	893	EPSPS	Lolium	TRUE	Timaru	Lolium multiflorum	Glyphosate	1458	5	0	5	0	0	1	Susceptible
488	1420	98	ACCase	Lolium	TRUE	Lincoln	Lolium perenne	Pinoxaden	30	23	0	23	0	0	1	Susceptible
488	1420	98	ALS	Lolium	TRUE	Lincoln	Lolium perenne	Iodosulfuron	7.5	15	0	15	0	0	1	Susceptible
488	1420	98	ALS	Lolium	TRUE	Lincoln	Lolium perenne	Pyroxsulam	15	9	0	9	0	0	1	Susceptible
488	1420	98	EPSPS	Lolium	TRUE	Lincoln	Lolium perenne	Glyphosate	1458	36	0	36	0	0	1	Susceptible
488	1420	99	ACCase	Lolium	TRUE	Lincoln	Lolium perenne	Haloxyfop	60	34	0	34	0	0	1	Susceptible
522	1535	96	ACCase	Lolium	TRUE	Lincoln	Lolium multiflorum	Clethodim	120	12	0	12	0	0	1	Susceptible
522	1535	96	ACCase	Lolium	TRUE	Lincoln	Lolium multiflorum	Haloxyfop	60	31	0	31	0	0	1	Susceptible
522	1535	96	ACCase	Lolium	TRUE	Lincoln	Lolium multiflorum	Pinoxaden	30	14	0	14	0	0	1	Susceptible
522	1535	96	ALS	Lolium	TRUE	Lincoln	Lolium multiflorum	Iodosulfuron	7.5	14	0	14	0	0	1	Susceptible
522	1535	96	ALS	Lolium	TRUE	Lincoln	Lolium multiflorum	Pyroxsulam	15	26	12	14	46	1	1	Resistant
522	1535	96	EPSPS	Lolium	TRUE	Lincoln	Lolium multiflorum	Glyphosate	1458	42	0	42	0	0	1	Susceptible
522	1535	97	ACCase	Avena	TRUE	Lincoln	Avena fatua	Clethodim	120	6	0	6	0	0	1	Susceptible
522	1535	97	ACCase	Avena	TRUE	Lincoln	Avena fatua	Fenoxaprop	51.75	6	2	4	33	0	1	Susceptible
522	1535	97	ACCase	Avena	TRUE	Lincoln	Avena fatua	Haloxyfop	52	8	0	8	0	0	1	Susceptible
522	1535	97	ACCase	Avena	TRUE	Lincoln	Avena fatua	Haloxyfop	60	7	0	7	0	0	1	Susceptible
522	1535	97	ACCase	Avena	TRUE	Lincoln	Avena fatua	Pinoxaden	25	11	0	11	0	0	1	Susceptible
522	1535	97	EPSPS	Avena	TRUE	Lincoln	Avena fatua	Glyphosate	1458	19	0	19	0	0	1	Susceptible
522	1535	231	ACCase	Avena	TRUE	Lincoln	Avena fatua	Clethodim	120	6	0	6	0	0	1	Susceptible
522	1535	231	ALS	Avena	TRUE	Lincoln	Avena fatua	Pyroxsulam	15	8	0	8	0	0	1	Susceptible
522	1535	231	EPSPS	Avena	TRUE	Lincoln	Avena fatua	Glyphosate	702	10	0	10	0	0	1	Susceptible
522	1535	233	ACCase	Avena	TRUE	Lincoln	Avena fatua	Clethodim	120	8	0	8	0	0	1	Susceptible
522	1535	233	ACCase	Avena	TRUE	Lincoln	Avena fatua	Fenoxaprop	51.75	8	0	8	0	0	1	Susceptible
522	1535	233	ACCase	Avena	TRUE	Lincoln	Avena fatua	Pinoxaden	30	7	0	7	0	0	1	Susceptible
522	1535	233	ALS	Avena	TRUE	Lincoln	Avena fatua	Pyroxsulam	15	8	0	8	0	0	1	Susceptible
522	1535	233	EPSPS	Avena	TRUE	Lincoln	Avena fatua	Glyphosate	702	8	0	8	0	0	1	Susceptible
522	1535	516	ALS	Sonchus	TRUE	Lincoln	Sonchus asper	Chlorsulfuron	15	5	5	0	100	1	1	Resistant
526	1553	91	ACCase	Phalaris	TRUE	Lincoln	Phalaris minor	Clethodim	120	7	0	7	0	0	1	Susceptible
526	1553	91	ACCase	Phalaris	TRUE	Lincoln	Phalaris minor	Fenoxaprop	51.75	7	0	7	0	0	1	Susceptible
526	1553	91	ACCase	Phalaris	TRUE	Lincoln	Phalaris minor	Haloxyfop	60	8	0	8	0	0	1	Susceptible
526	1553	91	ACCase	Phalaris	TRUE	Lincoln	Phalaris minor	Pinoxaden	30	16	0	16	0	0	1	Susceptible
526	1553	91	ALS	Phalaris	TRUE	Lincoln	Phalaris minor	Iodosulfuron	7.5	8	0	8	0	0	1	Susceptible
526	1553	91	EPSPS	Phalaris	TRUE	Lincoln	Phalaris minor	Glyphosate	1458	9	0	9	0	0	1	Susceptible
526	1553	93	ACCase	Lolium	TRUE	Lincoln	Lolium perenne	Clethodim	120	15	0	15	0	0	1	Susceptible
526	1553	93	ALS	Lolium	TRUE	Lincoln	Lolium perenne	Iodosulfuron	7.5	27	0	27	0	0	1	Susceptible
526	1553	93	EPSPS	Lolium	TRUE	Lincoln	Lolium perenne	Glyphosate	1458	16	0	16	0	0	1	Susceptible
526	1553	94	ACCase	Lolium	TRUE	Lincoln	Lolium perenne	Clethodim	120	25	0	25	0	0	1	Susceptible
526	1553	94	ACCase	Lolium	TRUE	Lincoln	Lolium perenne	Haloxyfop	60	125	0	125	0	0	1	Susceptible
526	1553	94	ACCase	Lolium	TRUE	Lincoln	Lolium perenne	Pinoxaden	30	57	0	57	0	0	1	Susceptible
526	1553	94	ALS	Lolium	TRUE	Lincoln	Lolium perenne	Iodosulfuron	7.5	58	0	58	0	0	1	Susceptible
526	1553	94	ALS	Lolium	TRUE	Lincoln	Lolium perenne	Pyroxsulam	15	110	20	90	18	1	1	Resistant
526	1553	94	EPSPS	Lolium	TRUE	Lincoln	Lolium perenne	Glyphosate	1458	55	0	55	0	0	1	Susceptible
526	1553	2435	ALS	Sonchus	TRUE	Lincoln	Sonchus oleraceus	Chlorsulfuron	15	13	0	13	0	0	1	Susceptible
526	1553	2435	EPSPS	Sonchus	TRUE	Lincoln	Sonchus oleraceus	Glyphosate	1458	16	0	16	0	0	1	Susceptible
531	1581	83	ACCase	Phalaris	TRUE	Lincoln	Phalaris minor	Haloxyfop	60	5	0	5	0	0	1	Susceptible
531	1581	83	ALS	Phalaris	TRUE	Lincoln	Phalaris minor	Clodinafop	24	32	11	21	34	1	1	Resistant
531	1581	84	ACCase	Lolium	TRUE	Lincoln	Lolium perenne	Haloxyfop	60	68	0	68	0	0	1	Susceptible
531	1581	84	ACCase	Lolium	TRUE	Lincoln	Lolium perenne	Pinoxaden	30	25	0	25	0	0	1	Susceptible
531	1581	84	ALS	Lolium	TRUE	Lincoln	Lolium perenne	Iodosulfuron	7.5	23	0	23	0	0	1	Susceptible
531	1581	86	ACCase	Avena	TRUE	Lincoln	Avena fatua	Clethodim	120	50	0	50	0	0	1	Susceptible
531	1581	86	ACCase	Avena	TRUE	Lincoln	Avena fatua	Fenoxaprop	51.75	48	23	25	48	1	1	Resistant
531	1581	86	ACCase	Avena	TRUE	Lincoln	Avena fatua	Haloxyfop	52	12	0	12	0	0	1	Susceptible
531	1581	86	ACCase	Avena	TRUE	Lincoln	Avena fatua	Pinoxaden	25	12	0	12	0	0	1	Susceptible
531	1581	87	ACCase	Avena	TRUE	Lincoln	Avena fatua	Haloxyfop	52	10	0	10	0	0	1	Susceptible
531	1581	87	ACCase	Avena	TRUE	Lincoln	Avena fatua	Pinoxaden	25	10	0	10	0	0	1	Susceptible
531	1581	88	ACCase	Lolium	TRUE	Lincoln	Lolium perenne	Clethodim	120	23	0	23	0	0	1	Susceptible
531	1581	88	EPSPS	Lolium	TRUE	Lincoln	Lolium perenne	Glyphosate	1458	95	0	95	0	0	1	Susceptible
531	1581	90	ACCase	Avena	TRUE	Lincoln	Avena fatua	Clethodim	120	14	0	14	0	0	1	Susceptible
531	1581	90	ACCase	Avena	TRUE	Lincoln	Avena fatua	Fenoxaprop	51.75	8	0	8	0	0	1	Susceptible
531	1581	90	ACCase	Avena	TRUE	Lincoln	Avena fatua	Haloxyfop	52	11	0	11	0	0	1	Susceptible
531	1581	90	ACCase	Avena	TRUE	Lincoln	Avena fatua	Haloxyfop	60	12	0	12	0	0	1	Susceptible
531	1581	90	ACCase	Avena	TRUE	Lincoln	Avena fatua	Pinoxaden	25	12	0	12	0	0	1	Susceptible
531	1581	90	EPSPS	Avena	TRUE	Lincoln	Avena fatua	Glyphosate	1458	15	0	15	0	0	1	Susceptible
531	1581	1859	ACCase	Phalaris	TRUE	Lincoln	Phalaris spp.	Clethodim	240	5	0	5	0	0	1	Susceptible
531	1581	1859	ACCase	Phalaris	TRUE	Lincoln	Phalaris spp.	Fenoxaprop	51.75	8	6	2	75	1	1	Resistant
531	1581	1859	ACCase	Phalaris	TRUE	Lincoln	Phalaris spp.	Haloxyfop	60	5	1	4	20	0	1	Susceptible
531	1581	1859	ACCase	Phalaris	TRUE	Lincoln	Phalaris spp.	Pinoxaden	30	8	0	8	0	0	1	Susceptible
531	1581	1859	ALS	Phalaris	TRUE	Lincoln	Phalaris spp.	Clodinafop	72	7	1	6	14	0	1	Susceptible
531	1581	1868	ACCase	Phalaris	TRUE	Lincoln	Phalaris minor	Clethodim	240	10	0	10	0	0	1	Susceptible
531	1581	1868	ACCase	Phalaris	TRUE	Lincoln	Phalaris minor	Fenoxaprop	51.75	10	10	0	100	1	1	Resistant
531	1581	1868	ACCase	Phalaris	TRUE	Lincoln	Phalaris minor	Haloxyfop	60	11	0	11	0	0	1	Susceptible
531	1581	1868	ACCase	Phalaris	TRUE	Lincoln	Phalaris minor	Pinoxaden	30	8	0	8	0	0	1	Susceptible
531	1581	1868	ACCase	Phalaris	TRUE	Lincoln	Phalaris minor	Pinoxaden	90	10	0	10	0	0	1	Susceptible
531	1581	1868	ALS	Phalaris	TRUE	Lincoln	Phalaris minor	Clodinafop	24	9	8	1	89	1	1	Resistant
531	1581	1869	ACCase	Phalaris	TRUE	Lincoln	Phalaris minor	Clethodim	240	8	0	8	0	0	1	Susceptible
531	1581	1869	ACCase	Phalaris	TRUE	Lincoln	Phalaris minor	Fenoxaprop	51.75	9	0	9	0	0	1	Susceptible
531	1581	1869	ACCase	Phalaris	TRUE	Lincoln	Phalaris minor	Haloxyfop	60	11	0	11	0	0	1	Susceptible
531	1581	1869	ACCase	Phalaris	TRUE	Lincoln	Phalaris minor	Pinoxaden	30	9	0	9	0	0	1	Susceptible
531	1581	1869	ALS	Phalaris	TRUE	Lincoln	Phalaris minor	Clodinafop	24	9	0	9	0	0	1	Susceptible
582	1810	73	ALS	Lolium	TRUE	Lincoln	Lolium perenne	Iodosulfuron	7.5	18	0	18	0	0	1	Susceptible
582	1810	73	EPSPS	Lolium	TRUE	Lincoln	Lolium perenne	Glyphosate	1458	19	0	19	0	0	1	Susceptible
582	1810	75	ACCase	Avena	TRUE	Lincoln	Avena fatua	Haloxyfop	52	7	0	7	0	0	1	Susceptible
582	1810	76	ACCase	Bromus	TRUE	Lincoln	Bromus catharticus	Clethodim	120	60	0	60	0	0	1	Susceptible
582	1810	76	ACCase	Bromus	TRUE	Lincoln	Bromus catharticus	Haloxyfop	60	57	0	57	0	0	1	Susceptible
582	1810	76	ALS	Bromus	TRUE	Lincoln	Bromus catharticus	Pyroxsulam	15	43	0	43	0	0	1	Susceptible
582	1810	76	EPSPS	Bromus	TRUE	Lincoln	Bromus catharticus	Glyphosate	1458	59	0	59	0	0	1	Susceptible
582	1810	77	ACCase	Bromus	TRUE	Lincoln	Bromus diandrus	Clethodim	120	12	0	12	0	0	1	Susceptible
582	1810	77	ACCase	Bromus	TRUE	Lincoln	Bromus diandrus	Haloxyfop	60	63	0	63	0	0	1	Susceptible
582	1810	77	ALS	Bromus	TRUE	Lincoln	Bromus diandrus	Pyroxsulam	15	15	0	15	0	0	1	Susceptible
582	1810	77	EPSPS	Bromus	TRUE	Lincoln	Bromus diandrus	Glyphosate	1458	54	0	54	0	0	1	Susceptible
582	1810	78	ACCase	Lolium	TRUE	Lincoln	Lolium perenne	Clethodim	120	12	0	12	0	0	1	Susceptible
582	1810	78	ACCase	Lolium	TRUE	Lincoln	Lolium perenne	Haloxyfop	60	52	9	43	17	1	1	Resistant
582	1810	78	ACCase	Lolium	TRUE	Lincoln	Lolium perenne	Pinoxaden	30	14	0	14	0	0	1	Susceptible
582	1810	78	ALS	Lolium	TRUE	Lincoln	Lolium perenne	Pyroxsulam	15	12	0	12	0	0	1	Susceptible
582	1810	78	EPSPS	Lolium	TRUE	Lincoln	Lolium perenne	Glyphosate	1458	19	0	19	0	0	1	Susceptible
582	1810	79	EPSPS	Vulpia	TRUE	Lincoln	Vulpia bromoides	Glyphosate	1458	17	0	17	0	0	1	Susceptible
582	1810	80	ACCase	Avena	TRUE	Lincoln	Avena fatua	Clethodim	120	48	0	48	0	0	1	Susceptible
582	1810	80	ACCase	Avena	TRUE	Lincoln	Avena fatua	Fenoxaprop	51.75	45	38	7	84	1	1	Resistant
582	1810	80	ACCase	Avena	TRUE	Lincoln	Avena fatua	Haloxyfop	52	9	0	9	0	0	1	Susceptible
582	1810	80	ACCase	Avena	TRUE	Lincoln	Avena fatua	Pinoxaden	25	9	0	9	0	0	1	Susceptible
582	1810	81	ACCase	Phalaris	TRUE	Lincoln	Phalaris spp.	Clethodim	120	10	0	10	0	0	1	Susceptible
582	1810	81	ACCase	Phalaris	TRUE	Lincoln	Phalaris spp.	Fenoxaprop	51.75	9	0	9	0	0	1	Susceptible
582	1810	81	ACCase	Phalaris	TRUE	Lincoln	Phalaris spp.	Haloxyfop	60	22	0	22	0	0	1	Susceptible
582	1810	81	ACCase	Phalaris	TRUE	Lincoln	Phalaris spp.	Pinoxaden	30	34	3	31	9	0	1	Susceptible
582	1810	81	ALS	Phalaris	TRUE	Lincoln	Phalaris spp.	Iodosulfuron	7.5	12	0	12	0	0	1	Susceptible
582	1810	81	EPSPS	Phalaris	TRUE	Lincoln	Phalaris spp.	Glyphosate	1458	13	0	13	0	0	1	Susceptible
582	1810	171	EPSPS	Lolium	TRUE	Lincoln	Lolium perenne	Glyphosate	1458	14	0	14	0	0	1	Susceptible
582	1810	1739	ACCase	Bromus	TRUE	Lincoln	Bromus diandrus	Clethodim	120	11	0	11	0	0	1	Susceptible
582	1810	1739	ACCase	Bromus	TRUE	Lincoln	Bromus diandrus	Haloxyfop	60	13	0	13	0	0	1	Susceptible
582	1810	1739	ALS	Bromus	TRUE	Lincoln	Bromus diandrus	Pyroxsulam	15	10	0	10	0	0	1	Susceptible
582	1810	1739	EPSPS	Bromus	TRUE	Lincoln	Bromus diandrus	Glyphosate	540	12	0	12	0	0	1	Susceptible
582	1810	1740	ACCase	Bromus	TRUE	Lincoln	Bromus diandrus	Clethodim	120	14	0	14	0	0	1	Susceptible
582	1810	1740	ACCase	Bromus	TRUE	Lincoln	Bromus diandrus	Haloxyfop	250	14	0	14	0	0	1	Susceptible
582	1810	1740	ALS	Bromus	TRUE	Lincoln	Bromus diandrus	Pyroxsulam	15	15	0	15	0	0	1	Susceptible
582	1810	1740	EPSPS	Bromus	TRUE	Lincoln	Bromus diandrus	Glyphosate	540	16	0	16	0	0	1	Susceptible
582	1810	1741	ACCase	Bromus	TRUE	Lincoln	Bromus diandrus	Clethodim	120	15	0	15	0	0	1	Susceptible
582	1810	1741	ACCase	Bromus	TRUE	Lincoln	Bromus diandrus	Haloxyfop	250	13	0	13	0	0	1	Susceptible
582	1810	1741	ALS	Bromus	TRUE	Lincoln	Bromus diandrus	Pyroxsulam	15	12	0	12	0	0	1	Susceptible
582	1810	1741	EPSPS	Bromus	TRUE	Lincoln	Bromus diandrus	Glyphosate	540	15	0	15	0	0	1	Susceptible
582	1810	1854	ACCase	Phalaris	TRUE	Lincoln	Phalaris spp.	Clethodim	240	5	0	5	0	0	1	Susceptible
582	1810	1854	ACCase	Phalaris	TRUE	Lincoln	Phalaris spp.	Haloxyfop	60	6	0	6	0	0	1	Susceptible
582	1810	1854	ACCase	Phalaris	TRUE	Lincoln	Phalaris spp.	Pinoxaden	30	5	0	5	0	0	1	Susceptible
582	1810	1854	ACCase	Phalaris	TRUE	Lincoln	Phalaris spp.	Pinoxaden	90	5	0	5	0	0	1	Susceptible
582	1810	1854	ALS	Phalaris	TRUE	Lincoln	Phalaris spp.	Clodinafop	24	7	6	1	86	1	1	Resistant
583	1813	71	ACCase	Lolium	TRUE	Lincoln	Lolium perenne	Clethodim	120	35	0	35	0	0	1	Susceptible
583	1813	71	ACCase	Lolium	TRUE	Lincoln	Lolium perenne	Haloxyfop	52	8	0	8	0	0	1	Susceptible
583	1813	71	ACCase	Lolium	TRUE	Lincoln	Lolium perenne	Pinoxaden	30	22	0	22	0	0	1	Susceptible
583	1813	71	ALS	Lolium	TRUE	Lincoln	Lolium perenne	Iodosulfuron	7.5	42	0	42	0	0	1	Susceptible
583	1813	71	ALS	Lolium	TRUE	Lincoln	Lolium perenne	Pyroxsulam	15	20	3	17	15	0	1	Susceptible
583	1813	71	EPSPS	Lolium	TRUE	Lincoln	Lolium perenne	Glyphosate	1458	10	0	10	0	0	1	Susceptible
583	1813	72	ACCase	Avena	TRUE	Lincoln	Avena fatua	Clethodim	120	61	0	61	0	0	1	Susceptible
583	1813	72	ACCase	Avena	TRUE	Lincoln	Avena fatua	Fenoxaprop	51.75	56	1	55	2	0	1	Susceptible
583	1813	72	ACCase	Avena	TRUE	Lincoln	Avena fatua	Haloxyfop	60	11	0	11	0	0	1	Susceptible
583	1813	72	ACCase	Avena	TRUE	Lincoln	Avena fatua	Pinoxaden	25	11	0	11	0	0	1	Susceptible
583	1813	72	ACCase	Avena	TRUE	Lincoln	Avena fatua	Pinoxaden	30	6	0	6	0	0	1	Susceptible
583	1813	72	EPSPS	Avena	TRUE	Lincoln	Avena fatua	Glyphosate	1458	14	0	14	0	0	1	Susceptible
583	1813	74	ACCase	Lolium	TRUE	Lincoln	Lolium perenne	Haloxyfop	60	64	0	64	0	0	1	Susceptible
583	1813	74	ACCase	Lolium	TRUE	Lincoln	Lolium perenne	Pinoxaden	30	18	0	18	0	0	1	Susceptible
583	1813	74	ALS	Lolium	TRUE	Lincoln	Lolium perenne	Pyroxsulam	15	39	0	39	0	0	1	Susceptible
583	1813	74	EPSPS	Lolium	TRUE	Lincoln	Lolium perenne	Glyphosate	1458	54	0	54	0	0	1	Susceptible
583	1813	235	ACCase	Avena	TRUE	Lincoln	Avena fatua	Clethodim	120	16	0	16	0	0	1	Susceptible
583	1813	235	ACCase	Avena	TRUE	Lincoln	Avena fatua	Fenoxaprop	51.75	19	0	19	0	0	1	Susceptible
583	1813	235	ACCase	Avena	TRUE	Lincoln	Avena fatua	Pinoxaden	30	20	0	20	0	0	1	Susceptible
583	1813	235	ALS	Avena	TRUE	Lincoln	Avena fatua	Pyroxsulam	15	19	0	19	0	0	1	Susceptible
583	1813	235	EPSPS	Avena	TRUE	Lincoln	Avena fatua	Glyphosate	702	18	0	18	0	0	1	Susceptible
619	1942	356	ACCase	Avena	TRUE	Timaru	Avena fatua	Fenoxaprop	51.75	19	0	19	0	0	1	Susceptible
619	1942	440	ACCase	Vulpia	TRUE	Timaru	Vulpia bromoides	Clethodim	240	21	0	21	0	0	1	Susceptible
619	1942	440	EPSPS	Vulpia	TRUE	Timaru	Vulpia bromoides	Glyphosate	1458	8	0	8	0	0	1	Susceptible
619	1942	548	ACCase	Vulpia	TRUE	Timaru	Vulpia bromoides	Clethodim	240	10	0	10	0	0	1	Susceptible
619	1942	548	EPSPS	Vulpia	TRUE	Timaru	Vulpia bromoides	Glyphosate	1458	5	0	5	0	0	1	Susceptible
619	1942	549	ACCase	Vulpia	TRUE	Timaru	Vulpia bromoides	Clethodim	240	8	0	8	0	0	1	Susceptible
619	1942	550	ACCase	Vulpia	TRUE	Timaru	Vulpia bromoides	Clethodim	240	7	0	7	0	0	1	Susceptible
619	1942	553	ACCase	Vulpia	TRUE	Timaru	Vulpia bromoides	Clethodim	240	5	0	5	0	0	1	Susceptible
619	1942	554	ACCase	Vulpia	TRUE	Timaru	Vulpia bromoides	Clethodim	240	7	0	7	0	0	1	Susceptible
619	1942	905	ACCase	Lolium	TRUE	Timaru	Lolium perenne	Clethodim	120	12	0	12	0	0	1	Susceptible
619	1942	905	ACCase	Lolium	TRUE	Timaru	Lolium perenne	Haloxyfop	60	9	0	9	0	0	1	Susceptible
619	1942	905	ACCase	Lolium	TRUE	Timaru	Lolium perenne	Pinoxaden	30	7	0	7	0	0	1	Susceptible
619	1942	905	ALS	Lolium	TRUE	Timaru	Lolium perenne	Iodosulfuron	7.5	14	0	14	0	0	1	Susceptible
619	1942	905	ALS	Lolium	TRUE	Timaru	Lolium perenne	Pyroxsulam	15	7	7	0	100	1	1	Resistant
619	1942	905	EPSPS	Lolium	TRUE	Timaru	Lolium perenne	Glyphosate	1458	16	0	16	0	0	1	Susceptible
619	1942	909	ACCase	Lolium	TRUE	Timaru	Lolium perenne	Haloxyfop	60	6	0	6	0	0	1	Susceptible
619	1942	914	ACCase	Lolium	TRUE	Timaru	Lolium perenne	Haloxyfop	125	5	0	5	0	0	1	Susceptible
619	1942	914	ACCase	Lolium	TRUE	Timaru	Lolium perenne	Pinoxaden	30	5	0	5	0	0	1	Susceptible
619	1942	914	ALS	Lolium	TRUE	Timaru	Lolium perenne	Iodosulfuron	7.5	7	0	7	0	0	1	Susceptible
619	1942	914	EPSPS	Lolium	TRUE	Timaru	Lolium perenne	Glyphosate	1458	5	0	5	0	0	1	Susceptible
619	1942	915	ACCase	Lolium	TRUE	Timaru	Lolium multiflorum	Haloxyfop	125	9	0	9	0	0	1	Susceptible
619	1942	915	ACCase	Lolium	TRUE	Timaru	Lolium multiflorum	Pinoxaden	30	10	0	10	0	0	1	Susceptible
619	1942	915	ALS	Lolium	TRUE	Timaru	Lolium multiflorum	Iodosulfuron	7.5	10	10	0	100	1	1	Resistant
619	1942	915	EPSPS	Lolium	TRUE	Timaru	Lolium multiflorum	Glyphosate	1458	8	0	8	0	0	1	Susceptible
665	2140	834	ACCase	Avena	TRUE	Timaru	Avena fatua	Fenoxaprop	51.75	16	0	16	0	0	1	Susceptible
665	2140	834	ALS	Avena	TRUE	Timaru	Avena fatua	Pyroxsulam	30	9	0	9	0	0	1	Susceptible
740	2398	68	ACCase	Lolium	TRUE	Lincoln	Lolium multiflorum	Clethodim	120	84	0	84	0	0	1	Susceptible
740	2398	68	ACCase	Lolium	TRUE	Lincoln	Lolium multiflorum	Haloxyfop	60	76	10	66	13	1	1	Resistant
740	2398	68	ACCase	Lolium	TRUE	Lincoln	Lolium multiflorum	Pinoxaden	30	110	43	67	39	1	1	Resistant
740	2398	68	ALS	Lolium	TRUE	Lincoln	Lolium multiflorum	Pyroxsulam	15	42	1	41	2	0	1	Susceptible
740	2398	69	ACCase	Lolium	TRUE	Lincoln	Lolium perenne	Clethodim	120	6	0	6	0	0	1	Susceptible
740	2398	69	ACCase	Lolium	TRUE	Lincoln	Lolium perenne	Haloxyfop	60	75	67	8	89	1	1	Resistant
740	2398	69	ACCase	Lolium	TRUE	Lincoln	Lolium perenne	Pinoxaden	30	12	0	12	0	0	1	Susceptible
740	2398	69	ALS	Lolium	TRUE	Lincoln	Lolium perenne	Pyroxsulam	15	24	15	9	62	1	1	Resistant
740	2398	69	EPSPS	Lolium	TRUE	Lincoln	Lolium perenne	Glyphosate	1458	42	0	42	0	0	1	Susceptible
740	2398	69	EPSPS	Lolium	TRUE	Lincoln	Lolium perenne	Glyphosate	1498	28	0	28	0	0	1	Susceptible
740	2398	70	ACCase	Avena	TRUE	Lincoln	Avena fatua	Clethodim	120	48	0	48	0	0	1	Susceptible
740	2398	70	ACCase	Avena	TRUE	Lincoln	Avena fatua	Fenoxaprop	51.75	46	0	46	0	0	1	Susceptible
740	2398	70	ACCase	Avena	TRUE	Lincoln	Avena fatua	Haloxyfop	52	10	0	10	0	0	1	Susceptible
740	2398	70	ACCase	Avena	TRUE	Lincoln	Avena fatua	Pinoxaden	25	10	0	10	0	0	1	Susceptible
744	2414	425	ALS	Bromus	TRUE	Timaru	Bromus catharticus	Pyroxsulam	15	9	0	9	0	0	1	Susceptible
775	3251	410	ACCase	Bromus	TRUE	Timaru	Bromus diandrus	Clethodim	120	5	0	5	0	0	1	Susceptible
775	3251	410	ACCase	Bromus	TRUE	Timaru	Bromus diandrus	Haloxyfop	250	6	0	6	0	0	1	Susceptible
775	3251	410	ALS	Bromus	TRUE	Timaru	Bromus diandrus	Pyroxsulam	15	8	0	8	0	0	1	Susceptible
775	3251	410	EPSPS	Bromus	TRUE	Timaru	Bromus diandrus	Glyphosate	540	6	0	6	0	0	1	Susceptible
775	3251	447	EPSPS	Sonchus	TRUE	Timaru	Sonchus asper	Glyphosate	1458	15	0	15	0	0	1	Susceptible
775	3251	476	ALS	Sonchus	TRUE	Timaru	Sonchus asper	Chlorsulfuron	15	12	4	8	33	1	1	Resistant
775	3251	476	EPSPS	Sonchus	TRUE	Timaru	Sonchus asper	Glyphosate	1458	14	0	14	0	0	1	Susceptible
775	3251	486	ACCase	Vulpia	TRUE	Timaru	Vulpia bromoides	Clethodim	240	13	0	13	0	0	1	Susceptible
775	3251	630	ACCase	Bromus	TRUE	Timaru	Bromus catharticus	Clethodim	240	10	0	10	0	0	1	Susceptible
775	3251	630	ACCase	Bromus	TRUE	Timaru	Bromus catharticus	Haloxyfop	250	10	0	10	0	0	1	Susceptible
775	3251	630	ALS	Bromus	TRUE	Timaru	Bromus catharticus	Pyroxsulam	15	9	0	9	0	0	1	Susceptible
775	3251	631	ACCase	Bromus	TRUE	Timaru	Bromus catharticus	Clethodim	240	12	0	12	0	0	1	Susceptible
775	3251	631	ACCase	Bromus	TRUE	Timaru	Bromus catharticus	Haloxyfop	250	12	0	12	0	0	1	Susceptible
775	3251	631	ALS	Bromus	TRUE	Timaru	Bromus catharticus	Pyroxsulam	15	14	0	14	0	0	1	Susceptible
775	3251	760	ACCase	Avena	TRUE	Timaru	Avena fatua	Clethodim	120	8	0	8	0	0	1	Susceptible
775	3251	760	ACCase	Avena	TRUE	Timaru	Avena fatua	Fenoxaprop	51.75	7	7	0	100	1	1	Resistant
775	3251	762	ACCase	Avena	TRUE	Timaru	Avena fatua	Clethodim	120	8	0	8	0	0	1	Susceptible
775	3251	762	ACCase	Avena	TRUE	Timaru	Avena fatua	Fenoxaprop	51.75	10	2	8	20	0	1	Susceptible
775	3251	762	ACCase	Avena	TRUE	Timaru	Avena fatua	Pinoxaden	30	9	0	9	0	0	1	Susceptible
775	3251	762	ALS	Avena	TRUE	Timaru	Avena fatua	Pyroxsulam	30	7	0	7	0	0	1	Susceptible
775	3251	762	EPSPS	Avena	TRUE	Timaru	Avena fatua	Glyphosate	1458	7	0	7	0	0	1	Susceptible
775	3251	763	ACCase	Avena	TRUE	Timaru	Avena fatua	Fenoxaprop	51.75	14	4	10	29	1	1	Resistant
775	3251	765	ALS	Avena	TRUE	Timaru	Avena fatua	Pyroxsulam	30	6	0	6	0	0	1	Susceptible
775	3251	1047	ACCase	Lolium	TRUE	Timaru	Lolium perenne	Clethodim	120	28	3	25	11	0	1	Susceptible
775	3251	1047	ACCase	Lolium	TRUE	Timaru	Lolium perenne	Haloxyfop	60	14	9	5	64	1	1	Resistant
775	3251	1047	ALS	Lolium	TRUE	Timaru	Lolium perenne	Iodosulfuron	7.5	18	12	6	67	1	1	Resistant
775	3251	1047	ALS	Lolium	TRUE	Timaru	Lolium perenne	Pyroxsulam	15	14	14	0	100	1	1	Resistant
775	3251	1047	EPSPS	Lolium	TRUE	Timaru	Lolium perenne	Glyphosate	1458	13	0	13	0	0	1	Susceptible
775	3251	1048	ACCase	Lolium	TRUE	Timaru	Lolium perenne	Haloxyfop	125	13	7	6	54	1	1	Resistant
775	3251	1048	ACCase	Lolium	TRUE	Timaru	Lolium perenne	Pinoxaden	30	10	5	5	50	1	1	Resistant
775	3251	1048	ALS	Lolium	TRUE	Timaru	Lolium perenne	Iodosulfuron	7.5	12	12	0	100	1	1	Resistant
775	3251	1048	EPSPS	Lolium	TRUE	Timaru	Lolium perenne	Glyphosate	1458	12	0	12	0	0	1	Susceptible
775	3251	1051	ACCase	Lolium	TRUE	Timaru	Lolium multiflorum	Haloxyfop	125	20	13	7	65	1	1	Resistant
775	3251	1051	ACCase	Lolium	TRUE	Timaru	Lolium multiflorum	Pinoxaden	30	19	13	6	68	1	1	Resistant
775	3251	1051	ALS	Lolium	TRUE	Timaru	Lolium multiflorum	Iodosulfuron	7.5	18	15	3	83	1	1	Resistant
775	3251	1051	EPSPS	Lolium	TRUE	Timaru	Lolium multiflorum	Glyphosate	1458	19	0	19	0	0	1	Susceptible
775	3251	1052	ACCase	Lolium	TRUE	Timaru	Lolium multiflorum	Haloxyfop	125	17	11	6	65	1	1	Resistant
775	3251	1052	ACCase	Lolium	TRUE	Timaru	Lolium multiflorum	Pinoxaden	30	17	4	13	24	1	1	Resistant
775	3251	1052	ALS	Lolium	TRUE	Timaru	Lolium multiflorum	Iodosulfuron	7.5	19	19	0	100	1	1	Resistant
775	3251	1052	EPSPS	Lolium	TRUE	Timaru	Lolium multiflorum	Glyphosate	1458	17	0	17	0	0	1	Susceptible
775	3251	1053	ACCase	Lolium	TRUE	Timaru	Lolium multiflorum	Haloxyfop	125	15	11	4	73	1	1	Resistant
775	3251	1053	ACCase	Lolium	TRUE	Timaru	Lolium multiflorum	Pinoxaden	30	18	12	6	67	1	1	Resistant
775	3251	1053	ALS	Lolium	TRUE	Timaru	Lolium multiflorum	Iodosulfuron	7.5	19	19	0	100	1	1	Resistant
775	3251	1053	EPSPS	Lolium	TRUE	Timaru	Lolium multiflorum	Glyphosate	1458	17	0	17	0	0	1	Susceptible
775	3251	1054	ACCase	Lolium	TRUE	Timaru	Lolium multiflorum	Haloxyfop	125	17	8	9	47	1	1	Resistant
775	3251	1054	ACCase	Lolium	TRUE	Timaru	Lolium multiflorum	Pinoxaden	30	15	12	3	80	1	1	Resistant
775	3251	1054	ALS	Lolium	TRUE	Timaru	Lolium multiflorum	Iodosulfuron	7.5	17	17	0	100	1	1	Resistant
775	3251	1054	EPSPS	Lolium	TRUE	Timaru	Lolium multiflorum	Glyphosate	1458	17	0	17	0	0	1	Susceptible
775	3251	1057	ACCase	Lolium	TRUE	Timaru	Lolium multiflorum	Haloxyfop	125	17	5	12	29	1	1	Resistant
775	3251	1057	ACCase	Lolium	TRUE	Timaru	Lolium multiflorum	Pinoxaden	30	16	9	7	56	1	1	Resistant
775	3251	1057	ALS	Lolium	TRUE	Timaru	Lolium multiflorum	Iodosulfuron	7.5	16	16	0	100	1	1	Resistant
775	3251	1057	EPSPS	Lolium	TRUE	Timaru	Lolium multiflorum	Glyphosate	1458	16	0	16	0	0	1	Susceptible
775	3251	1059	ACCase	Lolium	TRUE	Timaru	Lolium multiflorum	Haloxyfop	125	7	6	1	86	1	1	Resistant
775	3251	1059	ACCase	Lolium	TRUE	Timaru	Lolium multiflorum	Pinoxaden	30	7	6	1	86	1	1	Resistant
775	3251	1059	ALS	Lolium	TRUE	Timaru	Lolium multiflorum	Iodosulfuron	7.5	9	9	0	100	1	1	Resistant
775	3251	1059	EPSPS	Lolium	TRUE	Timaru	Lolium multiflorum	Glyphosate	1458	11	0	11	0	0	1	Susceptible
775	3251	1065	ACCase	Lolium	TRUE	Timaru	Lolium perenne	Pinoxaden	30	5	1	4	20	0	1	Susceptible
775	3251	1065	ALS	Lolium	TRUE	Timaru	Lolium perenne	Iodosulfuron	7.5	5	5	0	100	1	1	Resistant
775	3251	1065	EPSPS	Lolium	TRUE	Timaru	Lolium perenne	Glyphosate	1458	7	0	7	0	0	1	Susceptible
775	3251	1074	ACCase	Lolium	TRUE	Timaru	Lolium multiflorum	Clethodim	120	12	0	12	0	0	1	Susceptible
775	3251	1074	ACCase	Lolium	TRUE	Timaru	Lolium multiflorum	Haloxyfop	125	15	3	12	20	0	1	Susceptible
775	3251	1074	ACCase	Lolium	TRUE	Timaru	Lolium multiflorum	Pinoxaden	30	15	5	10	33	1	1	Resistant
775	3251	1074	ALS	Lolium	TRUE	Timaru	Lolium multiflorum	Iodosulfuron	7.5	16	15	1	94	1	1	Resistant
775	3251	1074	EPSPS	Lolium	TRUE	Timaru	Lolium multiflorum	Glyphosate	1458	17	0	17	0	0	1	Susceptible
775	3251	1075	ACCase	Lolium	TRUE	Timaru	Lolium multiflorum	Pinoxaden	30	10	0	10	0	0	1	Susceptible
775	3251	1075	ALS	Lolium	TRUE	Timaru	Lolium multiflorum	Iodosulfuron	7.5	10	7	3	70	1	1	Resistant
775	3251	1082	ACCase	Lolium	TRUE	Timaru	Lolium multiflorum	Haloxyfop	125	10	6	4	60	1	1	Resistant
775	3251	1082	ACCase	Lolium	TRUE	Timaru	Lolium multiflorum	Pinoxaden	30	10	4	6	40	1	1	Resistant
775	3251	1082	ALS	Lolium	TRUE	Timaru	Lolium multiflorum	Iodosulfuron	7.5	8	7	1	88	1	1	Resistant
775	3251	1082	EPSPS	Lolium	TRUE	Timaru	Lolium multiflorum	Glyphosate	1458	8	0	8	0	0	1	Susceptible
775	3251	1088	ACCase	Lolium	TRUE	Timaru	Lolium multiflorum	Haloxyfop	125	6	6	0	100	1	1	Resistant
777	3253	445	ALS	Sonchus	TRUE	Timaru	Sonchus asper	Chlorsulfuron	15	8	8	0	100	1	1	Resistant
777	3253	445	EPSPS	Sonchus	TRUE	Timaru	Sonchus asper	Glyphosate	1458	12	0	12	0	0	1	Susceptible
777	3253	448	ALS	Sonchus	TRUE	Timaru	Sonchus asper	Chlorsulfuron	15	16	16	0	100	1	1	Resistant
777	3253	448	EPSPS	Sonchus	TRUE	Timaru	Sonchus asper	Glyphosate	1458	11	0	11	0	0	1	Susceptible
777	3253	1093	ACCase	Lolium	TRUE	Timaru	Lolium perenne	Haloxyfop	125	7	3	4	43	0	1	Susceptible
777	3253	1093	ACCase	Lolium	TRUE	Timaru	Lolium perenne	Pinoxaden	30	7	6	1	86	1	1	Resistant
777	3253	1093	ALS	Lolium	TRUE	Timaru	Lolium perenne	Iodosulfuron	7.5	7	1	6	14	0	1	Susceptible
777	3253	1093	EPSPS	Lolium	TRUE	Timaru	Lolium perenne	Glyphosate	1458	11	0	11	0	0	1	Susceptible
777	3253	1094	ACCase	Lolium	TRUE	Timaru	Lolium perenne	Clethodim	120	32	24	8	75	1	1	Resistant
777	3253	1094	ACCase	Lolium	TRUE	Timaru	Lolium perenne	Haloxyfop	60	18	17	1	94	1	1	Resistant
777	3253	1094	ACCase	Lolium	TRUE	Timaru	Lolium perenne	Pinoxaden	30	16	14	2	88	1	1	Resistant
777	3253	1094	ALS	Lolium	TRUE	Timaru	Lolium perenne	Pyroxsulam	15	13	11	2	85	1	1	Resistant
777	3253	1094	EPSPS	Lolium	TRUE	Timaru	Lolium perenne	Glyphosate	1458	14	0	14	0	0	1	Susceptible
777	3253	1095	ACCase	Lolium	TRUE	Timaru	Lolium perenne	Haloxyfop	125	10	5	5	50	1	1	Resistant
777	3253	1095	ACCase	Lolium	TRUE	Timaru	Lolium perenne	Pinoxaden	30	9	6	3	67	1	1	Resistant
777	3253	1096	ACCase	Lolium	TRUE	Timaru	Lolium perenne	Clethodim	120	17	17	0	100	1	1	Resistant
777	3253	1096	ACCase	Lolium	TRUE	Timaru	Lolium perenne	Haloxyfop	125	17	8	9	47	1	1	Resistant
777	3253	1096	ACCase	Lolium	TRUE	Timaru	Lolium perenne	Pinoxaden	30	14	14	0	100	1	1	Resistant
777	3253	1096	ALS	Lolium	TRUE	Timaru	Lolium perenne	Iodosulfuron	7.5	12	10	2	83	1	1	Resistant
777	3253	1096	EPSPS	Lolium	TRUE	Timaru	Lolium perenne	Glyphosate	1458	32	0	32	0	0	1	Susceptible
777	3253	1097	ACCase	Lolium	TRUE	Timaru	Lolium perenne	Pinoxaden	30	5	1	4	20	0	1	Susceptible
777	3253	1098	ACCase	Lolium	TRUE	Timaru	Lolium perenne	Pinoxaden	30	8	3	5	38	0	1	Susceptible
777	3253	1098	ALS	Lolium	TRUE	Timaru	Lolium perenne	Iodosulfuron	7.5	7	0	7	0	0	1	Susceptible
777	3253	1098	EPSPS	Lolium	TRUE	Timaru	Lolium perenne	Glyphosate	1458	6	0	6	0	0	1	Susceptible
777	3253	1099	ACCase	Lolium	TRUE	Timaru	Lolium perenne	Clethodim	120	17	17	0	100	1	1	Resistant
777	3253	1099	ACCase	Lolium	TRUE	Timaru	Lolium perenne	Haloxyfop	125	17	8	9	47	1	1	Resistant
777	3253	1099	ACCase	Lolium	TRUE	Timaru	Lolium perenne	Pinoxaden	30	17	7	10	41	1	1	Resistant
777	3253	1099	ALS	Lolium	TRUE	Timaru	Lolium perenne	Iodosulfuron	7.5	15	7	8	47	1	1	Resistant
777	3253	1099	EPSPS	Lolium	TRUE	Timaru	Lolium perenne	Glyphosate	1458	19	0	19	0	0	1	Susceptible
777	3253	1100	ACCase	Lolium	TRUE	Timaru	Lolium perenne	Haloxyfop	125	16	11	5	69	1	1	Resistant
777	3253	1100	ACCase	Lolium	TRUE	Timaru	Lolium perenne	Pinoxaden	30	17	6	11	35	1	1	Resistant
777	3253	1100	ALS	Lolium	TRUE	Timaru	Lolium perenne	Iodosulfuron	7.5	11	2	9	18	0	1	Susceptible
777	3253	1100	EPSPS	Lolium	TRUE	Timaru	Lolium perenne	Glyphosate	1458	12	0	12	0	0	1	Susceptible
777	3253	1102	ACCase	Lolium	TRUE	Timaru	Lolium hybridum	Clethodim	240	14	14	0	100	1	1	Resistant
777	3253	1102	ACCase	Lolium	TRUE	Timaru	Lolium hybridum	Haloxyfop	60	12	12	0	100	1	1	Resistant
777	3253	1102	ACCase	Lolium	TRUE	Timaru	Lolium hybridum	Pinoxaden	30	20	14	6	70	1	1	Resistant
777	3253	1102	ALS	Lolium	TRUE	Timaru	Lolium hybridum	Iodosulfuron	7.5	12	0	12	0	0	1	Susceptible
777	3253	1102	ALS	Lolium	TRUE	Timaru	Lolium hybridum	Pyroxsulam	15	11	11	0	100	1	1	Resistant
777	3253	1102	EPSPS	Lolium	TRUE	Timaru	Lolium hybridum	Glyphosate	1458	9	0	9	0	0	1	Susceptible
777	3253	1103	ACCase	Lolium	TRUE	Timaru	Lolium multiflorum	Haloxyfop	125	8	6	2	75	1	1	Resistant
777	3253	1103	ACCase	Lolium	TRUE	Timaru	Lolium multiflorum	Pinoxaden	30	8	5	3	62	1	1	Resistant
777	3253	1103	ALS	Lolium	TRUE	Timaru	Lolium multiflorum	Iodosulfuron	7.5	8	3	5	38	0	1	Susceptible
777	3253	1103	EPSPS	Lolium	TRUE	Timaru	Lolium multiflorum	Glyphosate	1458	7	0	7	0	0	1	Susceptible
777	3253	1104	ACCase	Lolium	TRUE	Timaru	Lolium multiflorum	Haloxyfop	60	17	17	0	100	1	1	Resistant
777	3253	1104	ACCase	Lolium	TRUE	Timaru	Lolium multiflorum	Pinoxaden	30	16	14	2	88	1	1	Resistant
777	3253	1104	ALS	Lolium	TRUE	Timaru	Lolium multiflorum	Iodosulfuron	7.5	18	0	18	0	0	1	Susceptible
777	3253	1104	EPSPS	Lolium	TRUE	Timaru	Lolium multiflorum	Glyphosate	1458	11	0	11	0	0	1	Susceptible
777	3253	1105	ACCase	Lolium	TRUE	Timaru	Lolium multiflorum	Clethodim	120	17	17	0	100	1	1	Resistant
777	3253	1105	ACCase	Lolium	TRUE	Timaru	Lolium multiflorum	Haloxyfop	125	17	16	1	94	1	1	Resistant
777	3253	1105	ACCase	Lolium	TRUE	Timaru	Lolium multiflorum	Pinoxaden	30	17	17	0	100	1	1	Resistant
777	3253	1105	ALS	Lolium	TRUE	Timaru	Lolium multiflorum	Iodosulfuron	7.5	17	7	10	41	1	1	Resistant
777	3253	1105	EPSPS	Lolium	TRUE	Timaru	Lolium multiflorum	Glyphosate	1458	19	0	19	0	0	1	Susceptible
777	3253	1106	EPSPS	Lolium	TRUE	Timaru	Lolium multiflorum	Glyphosate	1458	14	0	14	0	0	1	Susceptible
777	3253	1107	ACCase	Lolium	TRUE	Timaru	Lolium perenne	Clethodim	120	15	15	0	100	1	1	Resistant
777	3253	1107	ACCase	Lolium	TRUE	Timaru	Lolium perenne	Haloxyfop	125	20	9	11	45	1	1	Resistant
777	3253	1107	ACCase	Lolium	TRUE	Timaru	Lolium perenne	Pinoxaden	30	18	18	0	100	1	1	Resistant
777	3253	1107	ALS	Lolium	TRUE	Timaru	Lolium perenne	Iodosulfuron	7.5	19	19	0	100	1	1	Resistant
777	3253	1107	EPSPS	Lolium	TRUE	Timaru	Lolium perenne	Glyphosate	1458	20	0	20	0	0	1	Susceptible
777	3253	1108	ACCase	Lolium	TRUE	Timaru	Lolium perenne	Clethodim	120	47	30	17	64	1	1	Resistant
777	3253	1108	ACCase	Lolium	TRUE	Timaru	Lolium perenne	Haloxyfop	60	14	11	3	79	1	1	Resistant
777	3253	1108	ACCase	Lolium	TRUE	Timaru	Lolium perenne	Pinoxaden	30	14	14	0	100	1	1	Resistant
777	3253	1108	ALS	Lolium	TRUE	Timaru	Lolium perenne	Iodosulfuron	7.5	17	5	12	29	1	1	Resistant
777	3253	1108	ALS	Lolium	TRUE	Timaru	Lolium perenne	Pyroxsulam	15	11	11	0	100	1	1	Resistant
777	3253	1108	EPSPS	Lolium	TRUE	Timaru	Lolium perenne	Glyphosate	1458	14	0	14	0	0	1	Susceptible
777	3253	1109	ACCase	Lolium	TRUE	Timaru	Lolium hybridum	Haloxyfop	60	17	17	0	100	1	1	Resistant
777	3253	1109	ACCase	Lolium	TRUE	Timaru	Lolium hybridum	Pinoxaden	30	17	17	0	100	1	1	Resistant
777	3253	1109	ALS	Lolium	TRUE	Timaru	Lolium hybridum	Iodosulfuron	7.5	18	7	11	39	1	1	Resistant
777	3253	1109	EPSPS	Lolium	TRUE	Timaru	Lolium hybridum	Glyphosate	1458	17	0	17	0	0	1	Susceptible
777	3253	1110	ACCase	Lolium	TRUE	Timaru	Lolium hybridum	Haloxyfop	125	14	14	0	100	1	1	Resistant
777	3253	1110	ACCase	Lolium	TRUE	Timaru	Lolium hybridum	Pinoxaden	30	17	17	0	100	1	1	Resistant
777	3253	1110	ALS	Lolium	TRUE	Timaru	Lolium hybridum	Iodosulfuron	7.5	17	17	0	100	1	1	Resistant
777	3253	1110	EPSPS	Lolium	TRUE	Timaru	Lolium hybridum	Glyphosate	1458	17	0	17	0	0	1	Susceptible
777	3253	1111	ACCase	Lolium	TRUE	Timaru	Lolium multiflorum	Haloxyfop	125	19	11	8	58	1	1	Resistant
777	3253	1111	ACCase	Lolium	TRUE	Timaru	Lolium multiflorum	Pinoxaden	30	16	9	7	56	1	1	Resistant
777	3253	1111	ALS	Lolium	TRUE	Timaru	Lolium multiflorum	Iodosulfuron	7.5	13	13	0	100	1	1	Resistant
777	3253	1111	EPSPS	Lolium	TRUE	Timaru	Lolium multiflorum	Glyphosate	1458	18	0	18	0	0	1	Susceptible
777	3253	1112	ACCase	Lolium	TRUE	Timaru	Lolium multiflorum	Haloxyfop	125	6	5	1	83	1	1	Resistant
777	3253	1112	ACCase	Lolium	TRUE	Timaru	Lolium multiflorum	Pinoxaden	30	10	9	1	90	1	1	Resistant
777	3253	1112	ALS	Lolium	TRUE	Timaru	Lolium multiflorum	Iodosulfuron	7.5	5	5	0	100	1	1	Resistant
777	3253	1112	EPSPS	Lolium	TRUE	Timaru	Lolium multiflorum	Glyphosate	1458	5	0	5	0	0	1	Susceptible
777	3253	1113	ACCase	Lolium	TRUE	Timaru	Lolium multiflorum	Clethodim	120	13	13	0	100	1	1	Resistant
777	3253	1113	ACCase	Lolium	TRUE	Timaru	Lolium multiflorum	Haloxyfop	60	8	8	0	100	1	1	Resistant
777	3253	1113	ACCase	Lolium	TRUE	Timaru	Lolium multiflorum	Pinoxaden	30	7	7	0	100	1	1	Resistant
777	3253	1113	EPSPS	Lolium	TRUE	Timaru	Lolium multiflorum	Glyphosate	1458	9	0	9	0	0	1	Susceptible
777	3253	1114	ACCase	Lolium	TRUE	Timaru	Lolium multiflorum	Haloxyfop	125	14	14	0	100	1	1	Resistant
777	3253	1114	ACCase	Lolium	TRUE	Timaru	Lolium multiflorum	Pinoxaden	30	14	14	0	100	1	1	Resistant
777	3253	1114	ALS	Lolium	TRUE	Timaru	Lolium multiflorum	Iodosulfuron	7.5	15	15	0	100	1	1	Resistant
777	3253	1114	EPSPS	Lolium	TRUE	Timaru	Lolium multiflorum	Glyphosate	1458	15	0	15	0	0	1	Susceptible
777	3253	1115	ACCase	Lolium	TRUE	Timaru	Lolium multiflorum	Clethodim	120	20	20	0	100	1	1	Resistant
777	3253	1115	ACCase	Lolium	TRUE	Timaru	Lolium multiflorum	Haloxyfop	125	13	12	1	92	1	1	Resistant
777	3253	1115	ACCase	Lolium	TRUE	Timaru	Lolium multiflorum	Pinoxaden	30	13	13	0	100	1	1	Resistant
777	3253	1115	ALS	Lolium	TRUE	Timaru	Lolium multiflorum	Iodosulfuron	7.5	14	13	1	93	1	1	Resistant
777	3253	1115	EPSPS	Lolium	TRUE	Timaru	Lolium multiflorum	Glyphosate	1458	16	0	16	0	0	1	Susceptible
777	3253	1116	ACCase	Lolium	TRUE	Timaru	Lolium multiflorum	Clethodim	120	16	16	0	100	1	1	Resistant
777	3253	1116	ACCase	Lolium	TRUE	Timaru	Lolium multiflorum	Haloxyfop	125	20	14	6	70	1	1	Resistant
777	3253	1116	ACCase	Lolium	TRUE	Timaru	Lolium multiflorum	Pinoxaden	30	18	18	0	100	1	1	Resistant
777	3253	1116	ALS	Lolium	TRUE	Timaru	Lolium multiflorum	Iodosulfuron	7.5	18	18	0	100	1	1	Resistant
777	3253	1116	EPSPS	Lolium	TRUE	Timaru	Lolium multiflorum	Glyphosate	1458	19	0	19	0	0	1	Susceptible
777	3253	1117	ACCase	Lolium	TRUE	Timaru	Lolium hybridum	Haloxyfop	125	15	7	8	47	1	1	Resistant
777	3253	1117	ACCase	Lolium	TRUE	Timaru	Lolium hybridum	Pinoxaden	30	13	13	0	100	1	1	Resistant
777	3253	1117	ALS	Lolium	TRUE	Timaru	Lolium hybridum	Iodosulfuron	7.5	12	12	0	100	1	1	Resistant
777	3253	1117	EPSPS	Lolium	TRUE	Timaru	Lolium hybridum	Glyphosate	1458	13	0	13	0	0	1	Susceptible
777	3253	1118	ACCase	Lolium	TRUE	Timaru	Lolium hybridum	Haloxyfop	125	15	13	2	87	1	1	Resistant
777	3253	1118	ACCase	Lolium	TRUE	Timaru	Lolium hybridum	Pinoxaden	30	19	17	2	89	1	1	Resistant
777	3253	1118	ALS	Lolium	TRUE	Timaru	Lolium hybridum	Iodosulfuron	7.5	17	9	8	53	1	1	Resistant
777	3253	1118	EPSPS	Lolium	TRUE	Timaru	Lolium hybridum	Glyphosate	1458	17	0	17	0	0	1	Susceptible
777	3253	1119	ACCase	Lolium	TRUE	Timaru	Lolium hybridum	Clethodim	240	20	20	0	100	1	1	Resistant
777	3253	1119	ACCase	Lolium	TRUE	Timaru	Lolium hybridum	Haloxyfop	60	13	13	0	100	1	1	Resistant
777	3253	1119	ACCase	Lolium	TRUE	Timaru	Lolium hybridum	Pinoxaden	30	15	14	1	93	1	1	Resistant
777	3253	1119	ALS	Lolium	TRUE	Timaru	Lolium hybridum	Iodosulfuron	7.5	16	8	8	50	1	1	Resistant
777	3253	1119	EPSPS	Lolium	TRUE	Timaru	Lolium hybridum	Glyphosate	1458	15	0	15	0	0	1	Susceptible
777	3253	1120	ACCase	Lolium	TRUE	Timaru	Lolium multiflorum	Haloxyfop	125	15	4	11	27	1	1	Resistant
777	3253	1120	ACCase	Lolium	TRUE	Timaru	Lolium multiflorum	Pinoxaden	30	13	11	2	85	1	1	Resistant
777	3253	1120	ALS	Lolium	TRUE	Timaru	Lolium multiflorum	Iodosulfuron	7.5	14	12	2	86	1	1	Resistant
777	3253	1120	EPSPS	Lolium	TRUE	Timaru	Lolium multiflorum	Glyphosate	1458	14	0	14	0	0	1	Susceptible
777	3253	1121	ACCase	Lolium	TRUE	Timaru	Lolium multiflorum	Haloxyfop	125	15	6	9	40	1	1	Resistant
777	3253	1121	ACCase	Lolium	TRUE	Timaru	Lolium multiflorum	Pinoxaden	30	19	16	3	84	1	1	Resistant
777	3253	1121	ALS	Lolium	TRUE	Timaru	Lolium multiflorum	Iodosulfuron	7.5	19	19	0	100	1	1	Resistant
777	3253	1121	EPSPS	Lolium	TRUE	Timaru	Lolium multiflorum	Glyphosate	1458	19	0	19	0	0	1	Susceptible
777	3253	1122	ACCase	Lolium	TRUE	Timaru	Lolium multiflorum	Clethodim	120	30	25	5	83	1	1	Resistant
777	3253	1122	ACCase	Lolium	TRUE	Timaru	Lolium multiflorum	Haloxyfop	60	14	13	1	93	1	1	Resistant
777	3253	1122	ACCase	Lolium	TRUE	Timaru	Lolium multiflorum	Pinoxaden	30	5	5	0	100	1	1	Resistant
777	3253	1122	ALS	Lolium	TRUE	Timaru	Lolium multiflorum	Iodosulfuron	7.5	15	9	6	60	1	1	Resistant
777	3253	1122	ALS	Lolium	TRUE	Timaru	Lolium multiflorum	Pyroxsulam	15	11	11	0	100	1	1	Resistant
777	3253	1122	EPSPS	Lolium	TRUE	Timaru	Lolium multiflorum	Glyphosate	1458	20	0	20	0	0	1	Susceptible
777	3253	1123	ACCase	Lolium	TRUE	Timaru	Lolium multiflorum	Haloxyfop	125	18	3	15	17	0	1	Susceptible
777	3253	1123	ACCase	Lolium	TRUE	Timaru	Lolium multiflorum	Pinoxaden	30	20	13	7	65	1	1	Resistant
777	3253	1123	ALS	Lolium	TRUE	Timaru	Lolium multiflorum	Iodosulfuron	7.5	16	16	0	100	1	1	Resistant
777	3253	1123	EPSPS	Lolium	TRUE	Timaru	Lolium multiflorum	Glyphosate	1458	20	0	20	0	0	1	Susceptible
777	3253	1124	ACCase	Lolium	TRUE	Timaru	Lolium multiflorum	Clethodim	120	14	14	0	100	1	1	Resistant
777	3253	1124	ACCase	Lolium	TRUE	Timaru	Lolium multiflorum	Haloxyfop	125	17	12	5	71	1	1	Resistant
777	3253	1124	ACCase	Lolium	TRUE	Timaru	Lolium multiflorum	Pinoxaden	30	18	17	1	94	1	1	Resistant
777	3253	1124	ALS	Lolium	TRUE	Timaru	Lolium multiflorum	Iodosulfuron	7.5	19	15	4	79	1	1	Resistant
777	3253	1124	EPSPS	Lolium	TRUE	Timaru	Lolium multiflorum	Glyphosate	1458	18	0	18	0	0	1	Susceptible
777	3253	1125	ACCase	Lolium	TRUE	Timaru	Lolium multiflorum	Clethodim	120	16	16	0	100	1	1	Resistant
777	3253	1125	ACCase	Lolium	TRUE	Timaru	Lolium multiflorum	Haloxyfop	125	15	12	3	80	1	1	Resistant
777	3253	1125	ACCase	Lolium	TRUE	Timaru	Lolium multiflorum	Pinoxaden	30	13	13	0	100	1	1	Resistant
777	3253	1125	ALS	Lolium	TRUE	Timaru	Lolium multiflorum	Iodosulfuron	7.5	12	12	0	100	1	1	Resistant
777	3253	1125	EPSPS	Lolium	TRUE	Timaru	Lolium multiflorum	Glyphosate	1458	10	0	10	0	0	1	Susceptible
777	3253	1126	ACCase	Lolium	TRUE	Timaru	Lolium multiflorum	Clethodim	120	19	13	6	68	1	1	Resistant
777	3253	1126	ACCase	Lolium	TRUE	Timaru	Lolium multiflorum	Haloxyfop	60	15	15	0	100	1	1	Resistant
777	3253	1126	ACCase	Lolium	TRUE	Timaru	Lolium multiflorum	Pinoxaden	30	7	7	0	100	1	1	Resistant
777	3253	1126	ALS	Lolium	TRUE	Timaru	Lolium multiflorum	Iodosulfuron	7.5	12	6	6	50	1	1	Resistant
777	3253	1126	ALS	Lolium	TRUE	Timaru	Lolium multiflorum	Pyroxsulam	15	11	11	0	100	1	1	Resistant
777	3253	1126	EPSPS	Lolium	TRUE	Timaru	Lolium multiflorum	Glyphosate	1458	11	0	11	0	0	1	Susceptible
785	3266	63	ACCase	Bromus	TRUE	Lincoln	Bromus catharticus	Clethodim	120	22	0	22	0	0	1	Susceptible
785	3266	63	ACCase	Bromus	TRUE	Lincoln	Bromus catharticus	Haloxyfop	60	29	0	29	0	0	1	Susceptible
785	3266	63	ALS	Bromus	TRUE	Lincoln	Bromus catharticus	Pyroxsulam	15	24	0	24	0	0	1	Susceptible
785	3266	63	EPSPS	Bromus	TRUE	Lincoln	Bromus catharticus	Glyphosate	1458	23	0	23	0	0	1	Susceptible
785	3266	64	ACCase	Avena	TRUE	Lincoln	Avena fatua	Clethodim	120	46	0	46	0	0	1	Susceptible
785	3266	64	ACCase	Avena	TRUE	Lincoln	Avena fatua	Fenoxaprop	51.75	49	0	49	0	0	1	Susceptible
785	3266	64	ACCase	Avena	TRUE	Lincoln	Avena fatua	Haloxyfop	52	9	0	9	0	0	1	Susceptible
785	3266	64	ACCase	Avena	TRUE	Lincoln	Avena fatua	Pinoxaden	25	11	0	11	0	0	1	Susceptible
785	3266	65	ACCase	Phalaris	TRUE	Lincoln	Phalaris minor	Haloxyfop	60	7	0	7	0	0	1	Susceptible
785	3266	65	ACCase	Phalaris	TRUE	Lincoln	Phalaris minor	Pinoxaden	30	15	0	15	0	0	1	Susceptible
785	3266	65	ALS	Phalaris	TRUE	Lincoln	Phalaris minor	Clodinafop	24	40	0	40	0	0	1	Susceptible
785	3266	65	ALS	Phalaris	TRUE	Lincoln	Phalaris minor	Iodosulfuron	7.5	9	0	9	0	0	1	Susceptible
785	3266	65	EPSPS	Phalaris	TRUE	Lincoln	Phalaris minor	Glyphosate	1458	6	0	6	0	0	1	Susceptible
785	3266	66	ACCase	Phalaris	TRUE	Lincoln	Phalaris minor	Fenoxaprop	51.75	20	0	20	0	0	1	Susceptible
785	3266	66	ALS	Phalaris	TRUE	Lincoln	Phalaris minor	Clodinafop	24	49	1	48	2	0	1	Susceptible
785	3266	67	ACCase	Avena	TRUE	Lincoln	Avena fatua	Pinoxaden	25	12	0	12	0	0	1	Susceptible
785	3266	67	EPSPS	Avena	TRUE	Lincoln	Avena fatua	Glyphosate	1458	5	0	5	0	0	1	Susceptible
799	3397	1015	ACCase	Lolium	TRUE	Timaru	Lolium multiflorum	Haloxyfop	125	21	1	20	5	0	1	Susceptible
799	3397	1015	ACCase	Lolium	TRUE	Timaru	Lolium multiflorum	Pinoxaden	30	18	0	18	0	0	1	Susceptible
799	3397	1015	ALS	Lolium	TRUE	Timaru	Lolium multiflorum	Iodosulfuron	7.5	11	4	7	36	1	1	Resistant
799	3397	1015	EPSPS	Lolium	TRUE	Timaru	Lolium multiflorum	Glyphosate	1458	19	0	19	0	0	1	Susceptible
799	3397	1016	ACCase	Lolium	TRUE	Timaru	Lolium multiflorum	Haloxyfop	60	14	0	14	0	0	1	Susceptible
799	3397	1016	ACCase	Lolium	TRUE	Timaru	Lolium multiflorum	Pinoxaden	30	13	0	13	0	0	1	Susceptible
799	3397	1016	ALS	Lolium	TRUE	Timaru	Lolium multiflorum	Iodosulfuron	7.5	19	0	19	0	0	1	Susceptible
799	3397	1016	EPSPS	Lolium	TRUE	Timaru	Lolium multiflorum	Glyphosate	1458	14	0	14	0	0	1	Susceptible
799	3397	1017	ACCase	Lolium	TRUE	Timaru	Lolium multiflorum	Haloxyfop	60	8	0	8	0	0	1	Susceptible
799	3397	1017	ACCase	Lolium	TRUE	Timaru	Lolium multiflorum	Pinoxaden	30	8	0	8	0	0	1	Susceptible
799	3397	1017	ALS	Lolium	TRUE	Timaru	Lolium multiflorum	Iodosulfuron	7.5	9	0	9	0	0	1	Susceptible
799	3397	1017	EPSPS	Lolium	TRUE	Timaru	Lolium multiflorum	Glyphosate	1458	8	0	8	0	0	1	Susceptible
799	3397	1018	ACCase	Lolium	TRUE	Timaru	Lolium multiflorum	Haloxyfop	125	19	0	19	0	0	1	Susceptible
799	3397	1018	ACCase	Lolium	TRUE	Timaru	Lolium multiflorum	Pinoxaden	30	21	2	19	10	0	1	Susceptible
799	3397	1018	ALS	Lolium	TRUE	Timaru	Lolium multiflorum	Iodosulfuron	7.5	24	5	19	21	1	1	Resistant
799	3397	1018	EPSPS	Lolium	TRUE	Timaru	Lolium multiflorum	Glyphosate	1458	19	0	19	0	0	1	Susceptible
799	3397	1019	ACCase	Lolium	TRUE	Timaru	Lolium multiflorum	Pinoxaden	30	19	0	19	0	0	1	Susceptible
799	3397	1019	ALS	Lolium	TRUE	Timaru	Lolium multiflorum	Iodosulfuron	7.5	25	11	14	44	1	1	Resistant
799	3397	1019	EPSPS	Lolium	TRUE	Timaru	Lolium multiflorum	Glyphosate	1458	17	0	17	0	0	1	Susceptible
799	3397	1020	ACCase	Lolium	TRUE	Timaru	Lolium multiflorum	Clethodim	120	7	0	7	0	0	1	Susceptible
799	3397	1020	ALS	Lolium	TRUE	Timaru	Lolium multiflorum	Pyroxsulam	15	5	4	1	80	1	1	Resistant
799	3397	1020	EPSPS	Lolium	TRUE	Timaru	Lolium multiflorum	Glyphosate	1458	5	0	5	0	0	1	Susceptible
799	3397	1021	ACCase	Lolium	TRUE	Timaru	Lolium multiflorum	Haloxyfop	60	15	0	15	0	0	1	Susceptible
799	3397	1021	ACCase	Lolium	TRUE	Timaru	Lolium multiflorum	Pinoxaden	30	14	0	14	0	0	1	Susceptible
799	3397	1021	ALS	Lolium	TRUE	Timaru	Lolium multiflorum	Iodosulfuron	7.5	13	0	13	0	0	1	Susceptible
799	3397	1021	EPSPS	Lolium	TRUE	Timaru	Lolium multiflorum	Glyphosate	1458	12	0	12	0	0	1	Susceptible
799	3397	1024	ACCase	Lolium	TRUE	Timaru	Lolium multiflorum	Pinoxaden	30	15	0	15	0	0	1	Susceptible
799	3397	1024	ALS	Lolium	TRUE	Timaru	Lolium multiflorum	Iodosulfuron	7.5	13	13	0	100	1	1	Resistant
799	3397	1024	EPSPS	Lolium	TRUE	Timaru	Lolium multiflorum	Glyphosate	1458	13	0	13	0	0	1	Susceptible
799	3397	1025	ACCase	Lolium	TRUE	Timaru	Lolium multiflorum	Haloxyfop	125	18	3	15	17	0	1	Susceptible
799	3397	1025	ACCase	Lolium	TRUE	Timaru	Lolium multiflorum	Pinoxaden	30	20	0	20	0	0	1	Susceptible
799	3397	1025	ALS	Lolium	TRUE	Timaru	Lolium multiflorum	Iodosulfuron	7.5	16	15	1	94	1	1	Resistant
799	3397	1025	EPSPS	Lolium	TRUE	Timaru	Lolium multiflorum	Glyphosate	1458	18	0	18	0	0	1	Susceptible
799	3397	1026	ACCase	Lolium	TRUE	Timaru	Lolium multiflorum	Haloxyfop	125	12	0	12	0	0	1	Susceptible
799	3397	1026	ALS	Lolium	TRUE	Timaru	Lolium multiflorum	Iodosulfuron	7.5	15	12	3	80	1	1	Resistant
799	3397	1026	EPSPS	Lolium	TRUE	Timaru	Lolium multiflorum	Glyphosate	1458	13	0	13	0	0	1	Susceptible
799	3397	1028	ACCase	Lolium	TRUE	Timaru	Lolium multiflorum	Clethodim	120	18	0	18	0	0	1	Susceptible
799	3397	1028	ALS	Lolium	TRUE	Timaru	Lolium multiflorum	Iodosulfuron	7.5	17	11	6	65	1	1	Resistant
799	3397	1028	ALS	Lolium	TRUE	Timaru	Lolium multiflorum	Pyroxsulam	15	19	17	2	89	1	1	Resistant
799	3397	1028	EPSPS	Lolium	TRUE	Timaru	Lolium multiflorum	Glyphosate	1458	17	0	17	0	0	1	Susceptible
799	3397	1031	ACCase	Lolium	TRUE	Timaru	Lolium multiflorum	Haloxyfop	60	10	10	0	100	1	1	Resistant
799	3397	1031	ACCase	Lolium	TRUE	Timaru	Lolium multiflorum	Pinoxaden	30	12	4	8	33	1	1	Resistant
799	3397	1031	ALS	Lolium	TRUE	Timaru	Lolium multiflorum	Iodosulfuron	7.5	10	7	3	70	1	1	Resistant
809	3426	61	ACCase	Lolium	TRUE	Lincoln	Lolium perenne	Haloxyfop	60	29	0	29	0	0	1	Susceptible
809	3426	61	ACCase	Lolium	TRUE	Lincoln	Lolium perenne	Pinoxaden	30	16	0	16	0	0	1	Susceptible
809	3426	61	ALS	Lolium	TRUE	Lincoln	Lolium perenne	Pyroxsulam	15	23	10	13	43	1	1	Resistant
809	3426	61	EPSPS	Lolium	TRUE	Lincoln	Lolium perenne	Glyphosate	1458	27	0	27	0	0	1	Susceptible
809	3426	62	EPSPS	Vulpia	TRUE	Lincoln	Vulpia bromoides	Glyphosate	1458	6	0	6	0	0	1	Susceptible
809	3426	514	ALS	Sonchus	TRUE	Lincoln	Sonchus oleraceus	Chlorsulfuron	15	5	5	0	100	1	1	Resistant
826	3488	55	ACCase	Bromus	TRUE	Lincoln	Bromus catharticus	Clethodim	120	86	0	86	0	0	1	Susceptible
826	3488	55	ACCase	Bromus	TRUE	Lincoln	Bromus catharticus	Haloxyfop	60	65	0	65	0	0	1	Susceptible
826	3488	55	ALS	Bromus	TRUE	Lincoln	Bromus catharticus	Pyroxsulam	15	50	0	50	0	0	1	Susceptible
826	3488	55	EPSPS	Bromus	TRUE	Lincoln	Bromus catharticus	Glyphosate	1458	88	0	88	0	0	1	Susceptible
826	3488	56	ACCase	Bromus	TRUE	Lincoln	Bromus diandrus	Haloxyfop	60	47	0	47	0	0	1	Susceptible
826	3488	56	EPSPS	Bromus	TRUE	Lincoln	Bromus diandrus	Glyphosate	1458	8	0	8	0	0	1	Susceptible
826	3488	57	ACCase	Lolium	TRUE	Lincoln	Lolium perenne	Haloxyfop	60	25	0	25	0	0	1	Susceptible
826	3488	57	ACCase	Lolium	TRUE	Lincoln	Lolium perenne	Pinoxaden	30	10	0	10	0	0	1	Susceptible
826	3488	57	ALS	Lolium	TRUE	Lincoln	Lolium perenne	Iodosulfuron	7.5	11	0	11	0	0	1	Susceptible
826	3488	57	ALS	Lolium	TRUE	Lincoln	Lolium perenne	Pyroxsulam	15	14	11	3	79	1	1	Resistant
826	3488	57	EPSPS	Lolium	TRUE	Lincoln	Lolium perenne	Glyphosate	1458	21	0	21	0	0	1	Susceptible
826	3488	59	ACCase	Lolium	TRUE	Lincoln	Lolium multiflorum	Clethodim	120	23	0	23	0	0	1	Susceptible
826	3488	59	ACCase	Lolium	TRUE	Lincoln	Lolium multiflorum	Haloxyfop	60	42	0	42	0	0	1	Susceptible
826	3488	59	ACCase	Lolium	TRUE	Lincoln	Lolium multiflorum	Pinoxaden	30	30	0	30	0	0	1	Susceptible
826	3488	59	ALS	Lolium	TRUE	Lincoln	Lolium multiflorum	Iodosulfuron	7.5	26	0	26	0	0	1	Susceptible
826	3488	59	ALS	Lolium	TRUE	Lincoln	Lolium multiflorum	Pyroxsulam	15	14	0	14	0	0	1	Susceptible
826	3488	59	EPSPS	Lolium	TRUE	Lincoln	Lolium multiflorum	Glyphosate	1458	38	0	38	0	0	1	Susceptible
826	3488	519	ALS	Sonchus	TRUE	Lincoln	Sonchus oleraceus	Chlorsulfuron	15	6	1	5	17	0	1	Susceptible
826	3488	519	EPSPS	Sonchus	TRUE	Lincoln	Sonchus oleraceus	Glyphosate	1458	5	0	5	0	0	1	Susceptible
832	3519	54	ACCase	Avena	TRUE	Lincoln	Avena fatua	Clethodim	120	38	0	38	0	0	1	Susceptible
832	3519	54	ACCase	Avena	TRUE	Lincoln	Avena fatua	Fenoxaprop	51.75	43	0	43	0	0	1	Susceptible
832	3519	54	ACCase	Avena	TRUE	Lincoln	Avena fatua	Haloxyfop	52	8	0	8	0	0	1	Susceptible
832	3519	54	ACCase	Avena	TRUE	Lincoln	Avena fatua	Pinoxaden	25	11	0	11	0	0	1	Susceptible
848	3569	52	ACCase	Lolium	TRUE	Lincoln	Lolium perenne	Haloxyfop	60	23	21	2	91	1	1	Resistant
848	3569	52	ACCase	Lolium	TRUE	Lincoln	Lolium perenne	Pinoxaden	30	13	0	13	0	0	1	Susceptible
848	3569	52	ALS	Lolium	TRUE	Lincoln	Lolium perenne	Iodosulfuron	7.5	13	0	13	0	0	1	Susceptible
848	3569	52	ALS	Lolium	TRUE	Lincoln	Lolium perenne	Pyroxsulam	15	10	0	10	0	0	1	Susceptible
848	3569	52	EPSPS	Lolium	TRUE	Lincoln	Lolium perenne	Glyphosate	1458	55	0	55	0	0	1	Susceptible
848	3569	53	ACCase	Vulpia	TRUE	Lincoln	Vulpia bromoides	Clethodim	120	6	0	6	0	0	1	Susceptible
848	3569	53	EPSPS	Vulpia	TRUE	Lincoln	Vulpia bromoides	Glyphosate	1458	58	0	58	0	0	1	Susceptible
848	3569	155	ACCase	Lolium	TRUE	Lincoln	Lolium perenne	Haloxyfop	60	25	17	8	68	1	1	Resistant
848	3569	155	ALS	Lolium	TRUE	Lincoln	Lolium perenne	Iodosulfuron	7.5	14	0	14	0	0	1	Susceptible
848	3569	155	EPSPS	Lolium	TRUE	Lincoln	Lolium perenne	Glyphosate	1458	14	0	14	0	0	1	Susceptible
848	3569	517	ALS	Sonchus	TRUE	Lincoln	Sonchus oleraceus	Chlorsulfuron	15	18	0	18	0	0	1	Susceptible
848	3569	517	EPSPS	Sonchus	TRUE	Lincoln	Sonchus oleraceus	Glyphosate	1458	16	0	16	0	0	1	Susceptible
848	3569	524	ACCase	Bromus	TRUE	Lincoln	Bromus hordeaceus	Clethodim	240	6	0	6	0	0	1	Susceptible
848	3569	524	ACCase	Bromus	TRUE	Lincoln	Bromus hordeaceus	Haloxyfop	250	9	0	9	0	0	1	Susceptible
848	3569	524	ALS	Bromus	TRUE	Lincoln	Bromus hordeaceus	Pyroxsulam	15	6	0	6	0	0	1	Susceptible
848	3569	524	EPSPS	Bromus	TRUE	Lincoln	Bromus hordeaceus	Glyphosate	540	7	0	7	0	0	1	Susceptible
872	3662	46	ACCase	Lolium	TRUE	Lincoln	Lolium multiflorum	Clethodim	120	64	0	64	0	0	1	Susceptible
872	3662	46	ACCase	Lolium	TRUE	Lincoln	Lolium multiflorum	Haloxyfop	60	136	0	136	0	0	1	Susceptible
872	3662	46	ACCase	Lolium	TRUE	Lincoln	Lolium multiflorum	Pinoxaden	30	43	0	43	0	0	1	Susceptible
872	3662	46	ALS	Lolium	TRUE	Lincoln	Lolium multiflorum	Iodosulfuron	7.5	107	0	107	0	0	1	Susceptible
872	3662	46	ALS	Lolium	TRUE	Lincoln	Lolium multiflorum	Pyroxsulam	15	107	13	94	12	1	1	Resistant
872	3662	46	EPSPS	Lolium	TRUE	Lincoln	Lolium multiflorum	Glyphosate	1458	30	0	30	0	0	1	Susceptible
872	3662	47	ACCase	Lolium	TRUE	Lincoln	Lolium perenne	Haloxyfop	60	33	0	33	0	0	1	Susceptible
872	3662	47	ACCase	Lolium	TRUE	Lincoln	Lolium perenne	Pinoxaden	30	26	0	26	0	0	1	Susceptible
872	3662	47	ALS	Lolium	TRUE	Lincoln	Lolium perenne	Pyroxsulam	15	39	3	36	8	0	1	Susceptible
872	3662	47	EPSPS	Lolium	TRUE	Lincoln	Lolium perenne	Glyphosate	1458	19	0	19	0	0	1	Susceptible
872	3662	48	ACCase	Bromus	TRUE	Lincoln	Bromus hordeaceus	Clethodim	120	94	0	94	0	0	1	Susceptible
872	3662	48	ACCase	Bromus	TRUE	Lincoln	Bromus hordeaceus	Haloxyfop	60	154	0	154	0	0	1	Susceptible
872	3662	48	EPSPS	Bromus	TRUE	Lincoln	Bromus hordeaceus	Glyphosate	1458	126	0	126	0	0	1	Susceptible
872	3662	49	ACCase	Lolium	TRUE	Lincoln	Lolium multiflorum	Clethodim	120	24	0	24	0	0	1	Susceptible
872	3662	49	ACCase	Lolium	TRUE	Lincoln	Lolium multiflorum	Pinoxaden	30	38	0	38	0	0	1	Susceptible
872	3662	49	ALS	Lolium	TRUE	Lincoln	Lolium multiflorum	Iodosulfuron	7.5	87	0	87	0	0	1	Susceptible
872	3662	49	ALS	Lolium	TRUE	Lincoln	Lolium multiflorum	Pyroxsulam	15	32	5	27	16	1	1	Resistant
872	3662	49	EPSPS	Lolium	TRUE	Lincoln	Lolium multiflorum	Glyphosate	1458	32	0	32	0	0	1	Susceptible
872	3662	50	ACCase	Bromus	TRUE	Lincoln	Bromus hordeaceus	Clethodim	120	79	0	79	0	0	1	Susceptible
872	3662	50	ACCase	Bromus	TRUE	Lincoln	Bromus hordeaceus	Haloxyfop	60	216	0	216	0	0	1	Susceptible
872	3662	50	EPSPS	Bromus	TRUE	Lincoln	Bromus hordeaceus	Glyphosate	1458	112	0	112	0	0	1	Susceptible
872	3662	51	ACCase	Avena	TRUE	Lincoln	Avena fatua	Clethodim	120	36	0	36	0	0	1	Susceptible
872	3662	51	ACCase	Avena	TRUE	Lincoln	Avena fatua	Fenoxaprop	51.75	39	0	39	0	0	1	Susceptible
872	3662	51	ACCase	Avena	TRUE	Lincoln	Avena fatua	Haloxyfop	52	12	0	12	0	0	1	Susceptible
872	3662	51	ACCase	Avena	TRUE	Lincoln	Avena fatua	Pinoxaden	25	10	0	10	0	0	1	Susceptible
872	3662	169	ACCase	Lolium	TRUE	Lincoln	Lolium perenne	Haloxyfop	60	36	0	36	0	0	1	Susceptible
872	3662	169	ACCase	Lolium	TRUE	Lincoln	Lolium perenne	Pinoxaden	30	38	0	38	0	0	1	Susceptible
872	3662	1789	ACCase	Bromus	TRUE	Lincoln	Bromus hordeaceus	Clethodim	240	19	0	19	0	0	1	Susceptible
872	3662	1789	ACCase	Bromus	TRUE	Lincoln	Bromus hordeaceus	Haloxyfop	250	20	0	20	0	0	1	Susceptible
872	3662	1789	ALS	Bromus	TRUE	Lincoln	Bromus hordeaceus	Pyroxsulam	15	20	0	20	0	0	1	Susceptible
872	3662	1789	EPSPS	Bromus	TRUE	Lincoln	Bromus hordeaceus	Glyphosate	540	20	0	20	0	0	1	Susceptible
872	3662	1796	ACCase	Bromus	TRUE	Lincoln	Bromus hordeaceus	Haloxyfop	250	20	0	20	0	0	1	Susceptible
872	3662	1796	EPSPS	Bromus	TRUE	Lincoln	Bromus hordeaceus	Glyphosate	540	18	0	18	0	0	1	Susceptible
878	3716	43	ACCase	Bromus	TRUE	Lincoln	Bromus diandrus	Clethodim	120	20	0	20	0	0	1	Susceptible
878	3716	43	EPSPS	Bromus	TRUE	Lincoln	Bromus diandrus	Glyphosate	1458	11	0	11	0	0	1	Susceptible
878	3716	44	ACCase	Lolium	TRUE	Lincoln	Lolium perenne	Clethodim	120	20	0	20	0	0	1	Susceptible
878	3716	44	ACCase	Lolium	TRUE	Lincoln	Lolium perenne	Haloxyfop	60	55	0	55	0	0	1	Susceptible
878	3716	44	ALS	Lolium	TRUE	Lincoln	Lolium perenne	Iodosulfuron	7.5	23	0	23	0	0	1	Susceptible
878	3716	44	ALS	Lolium	TRUE	Lincoln	Lolium perenne	Pyroxsulam	15	52	16	36	31	1	1	Resistant
878	3716	44	EPSPS	Lolium	TRUE	Lincoln	Lolium perenne	Glyphosate	1458	16	0	16	0	0	1	Susceptible
878	3716	45	ACCase	Lolium	TRUE	Lincoln	Lolium perenne	Haloxyfop	60	27	0	27	0	0	1	Susceptible
878	3716	45	ACCase	Lolium	TRUE	Lincoln	Lolium perenne	Pinoxaden	30	13	0	13	0	0	1	Susceptible
878	3716	45	ALS	Lolium	TRUE	Lincoln	Lolium perenne	Iodosulfuron	7.5	15	0	15	0	0	1	Susceptible
878	3716	45	ALS	Lolium	TRUE	Lincoln	Lolium perenne	Pyroxsulam	15	69	57	12	83	1	1	Resistant
878	3716	45	EPSPS	Lolium	TRUE	Lincoln	Lolium perenne	Glyphosate	1458	29	0	29	0	0	1	Susceptible
889	3761	838	ACCase	Avena	TRUE	Timaru	Avena fatua	Fenoxaprop	51.75	11	0	11	0	0	1	Susceptible
889	3761	840	ACCase	Avena	TRUE	Timaru	Avena fatua	Fenoxaprop	51.75	15	0	15	0	0	1	Susceptible
893	3768	338	ACCase	Vulpia	TRUE	Timaru	Vulpia bromoides	Clethodim	240	12	0	12	0	0	1	Susceptible
893	3768	338	EPSPS	Vulpia	TRUE	Timaru	Vulpia bromoides	Glyphosate	1458	16	0	16	0	0	1	Susceptible
893	3768	401	ACCase	Bromus	TRUE	Timaru	Bromus hordeaceus	Clethodim	240	17	0	17	0	0	1	Susceptible
893	3768	401	ACCase	Bromus	TRUE	Timaru	Bromus hordeaceus	Haloxyfop	250	18	0	18	0	0	1	Susceptible
893	3768	401	ALS	Bromus	TRUE	Timaru	Bromus hordeaceus	Pyroxsulam	15	17	0	17	0	0	1	Susceptible
893	3768	401	EPSPS	Bromus	TRUE	Timaru	Bromus hordeaceus	Glyphosate	540	12	0	12	0	0	1	Susceptible
893	3768	439	ACCase	Vulpia	TRUE	Timaru	Vulpia bromoides	Clethodim	240	5	0	5	0	0	1	Susceptible
893	3768	439	EPSPS	Vulpia	TRUE	Timaru	Vulpia bromoides	Glyphosate	1458	11	0	11	0	0	1	Susceptible
893	3768	595	ACCase	Bromus	TRUE	Timaru	Bromus catharticus	Clethodim	240	15	0	15	0	0	1	Susceptible
893	3768	595	ACCase	Bromus	TRUE	Timaru	Bromus catharticus	Haloxyfop	250	15	0	15	0	0	1	Susceptible
893	3768	595	ALS	Bromus	TRUE	Timaru	Bromus catharticus	Pyroxsulam	15	15	0	15	0	0	1	Susceptible
893	3768	596	ACCase	Bromus	TRUE	Timaru	Bromus catharticus	Clethodim	240	12	0	12	0	0	1	Susceptible
893	3768	596	ACCase	Bromus	TRUE	Timaru	Bromus catharticus	Haloxyfop	250	13	0	13	0	0	1	Susceptible
893	3768	596	ALS	Bromus	TRUE	Timaru	Bromus catharticus	Pyroxsulam	15	15	0	15	0	0	1	Susceptible
897	3786	42	ACCase	Lolium	TRUE	Lincoln	Lolium perenne	Haloxyfop	60	117	0	117	0	0	1	Susceptible
897	3786	42	ACCase	Lolium	TRUE	Lincoln	Lolium perenne	Pinoxaden	30	50	0	50	0	0	1	Susceptible
897	3786	42	ALS	Lolium	TRUE	Lincoln	Lolium perenne	Iodosulfuron	7.5	45	0	45	0	0	1	Susceptible
897	3786	42	ALS	Lolium	TRUE	Lincoln	Lolium perenne	Pyroxsulam	15	55	5	50	9	0	1	Susceptible
897	3786	42	EPSPS	Lolium	TRUE	Lincoln	Lolium perenne	Glyphosate	1458	50	0	50	0	0	1	Susceptible
912	3883	156	ACCase	Bromus	TRUE	Lincoln	Bromus catharticus	Clethodim	120	29	0	29	0	0	1	Susceptible
912	3883	156	ACCase	Bromus	TRUE	Lincoln	Bromus catharticus	Haloxyfop	60	24	0	24	0	0	1	Susceptible
912	3883	156	ALS	Bromus	TRUE	Lincoln	Bromus catharticus	Pyroxsulam	15	17	0	17	0	0	1	Susceptible
912	3883	156	EPSPS	Bromus	TRUE	Lincoln	Bromus catharticus	Glyphosate	1458	32	0	32	0	0	1	Susceptible
912	3883	166	ACCase	Lolium	TRUE	Lincoln	Lolium perenne	Fenoxaprop	51.75	7	0	7	0	0	1	Susceptible
912	3883	166	ACCase	Lolium	TRUE	Lincoln	Lolium perenne	Haloxyfop	60	7	0	7	0	0	1	Susceptible
912	3883	166	ACCase	Lolium	TRUE	Lincoln	Lolium perenne	Pinoxaden	30	17	0	17	0	0	1	Susceptible
912	3883	166	ALS	Lolium	TRUE	Lincoln	Lolium perenne	Iodosulfuron	7.5	11	0	11	0	0	1	Susceptible
912	3883	166	ALS	Lolium	TRUE	Lincoln	Lolium perenne	Pyroxsulam	15	33	3	30	9	0	1	Susceptible
912	3883	166	EPSPS	Lolium	TRUE	Lincoln	Lolium perenne	Glyphosate	1458	11	0	11	0	0	1	Susceptible
915	3888	215	ALS	Bromus	FALSE	Lincoln	Bromus catharticus	Pyroxsulam	15	9	0	9	0	0	1	Susceptible
915	3888	1532	ACCase	Avena	FALSE	Lincoln	Avena fatua	Fenoxaprop	51.75	10	0	10	0	0	1	Susceptible
915	3888	1532	ALS	Avena	FALSE	Lincoln	Avena fatua	Pyroxsulam	15	9	0	9	0	0	1	Susceptible
932	3948	456	ALS	Sonchus	TRUE	Timaru	Sonchus asper	Chlorsulfuron	15	6	6	0	100	1	1	Resistant
932	3948	456	EPSPS	Sonchus	TRUE	Timaru	Sonchus asper	Glyphosate	1458	7	0	7	0	0	1	Susceptible
932	3948	484	ACCase	Bromus	TRUE	Timaru	Bromus hordeaceus	Clethodim	240	9	0	9	0	0	1	Susceptible
932	3948	484	ACCase	Bromus	TRUE	Timaru	Bromus hordeaceus	Haloxyfop	250	10	0	10	0	0	1	Susceptible
932	3948	484	ALS	Bromus	TRUE	Timaru	Bromus hordeaceus	Pyroxsulam	15	9	0	9	0	0	1	Susceptible
932	3948	484	EPSPS	Bromus	TRUE	Timaru	Bromus hordeaceus	Glyphosate	540	10	0	10	0	0	1	Susceptible
933	3948	982	ACCase	Lolium	TRUE	Timaru	Lolium multiflorum	Haloxyfop	60	11	0	11	0	0	1	Susceptible
933	3948	982	ACCase	Lolium	TRUE	Timaru	Lolium multiflorum	Pinoxaden	30	14	0	14	0	0	1	Susceptible
933	3948	982	ALS	Lolium	TRUE	Timaru	Lolium multiflorum	Iodosulfuron	7.5	9	0	9	0	0	1	Susceptible
933	3948	982	EPSPS	Lolium	TRUE	Timaru	Lolium multiflorum	Glyphosate	1458	11	0	11	0	0	1	Susceptible
933	3948	983	ACCase	Lolium	TRUE	Timaru	Lolium multiflorum	Haloxyfop	125	13	0	13	0	0	1	Susceptible
933	3948	983	ACCase	Lolium	TRUE	Timaru	Lolium multiflorum	Pinoxaden	30	12	0	12	0	0	1	Susceptible
933	3948	983	ALS	Lolium	TRUE	Timaru	Lolium multiflorum	Iodosulfuron	7.5	15	0	15	0	0	1	Susceptible
933	3948	983	EPSPS	Lolium	TRUE	Timaru	Lolium multiflorum	Glyphosate	1458	16	0	16	0	0	1	Susceptible
933	3948	984	ACCase	Lolium	TRUE	Timaru	Lolium multiflorum	Haloxyfop	60	10	0	10	0	0	1	Susceptible
933	3948	984	ACCase	Lolium	TRUE	Timaru	Lolium multiflorum	Pinoxaden	30	6	0	6	0	0	1	Susceptible
933	3948	984	EPSPS	Lolium	TRUE	Timaru	Lolium multiflorum	Glyphosate	1458	12	0	12	0	0	1	Susceptible
933	3948	985	ACCase	Lolium	TRUE	Timaru	Lolium multiflorum	Haloxyfop	125	8	0	8	0	0	1	Susceptible
933	3948	985	ACCase	Lolium	TRUE	Timaru	Lolium multiflorum	Pinoxaden	30	10	0	10	0	0	1	Susceptible
933	3948	985	ALS	Lolium	TRUE	Timaru	Lolium multiflorum	Iodosulfuron	7.5	10	0	10	0	0	1	Susceptible
933	3948	985	EPSPS	Lolium	TRUE	Timaru	Lolium multiflorum	Glyphosate	1458	10	0	10	0	0	1	Susceptible
933	3948	986	ACCase	Lolium	TRUE	Timaru	Lolium multiflorum	Haloxyfop	125	15	0	15	0	0	1	Susceptible
933	3948	986	ACCase	Lolium	TRUE	Timaru	Lolium multiflorum	Pinoxaden	30	15	0	15	0	0	1	Susceptible
933	3948	986	ALS	Lolium	TRUE	Timaru	Lolium multiflorum	Iodosulfuron	7.5	14	0	14	0	0	1	Susceptible
933	3948	986	EPSPS	Lolium	TRUE	Timaru	Lolium multiflorum	Glyphosate	1458	14	0	14	0	0	1	Susceptible
933	3948	987	ACCase	Lolium	TRUE	Timaru	Lolium multiflorum	Haloxyfop	125	18	0	18	0	0	1	Susceptible
933	3948	987	ACCase	Lolium	TRUE	Timaru	Lolium multiflorum	Pinoxaden	30	16	0	16	0	0	1	Susceptible
933	3948	987	ALS	Lolium	TRUE	Timaru	Lolium multiflorum	Iodosulfuron	7.5	17	0	17	0	0	1	Susceptible
933	3948	987	EPSPS	Lolium	TRUE	Timaru	Lolium multiflorum	Glyphosate	1458	18	0	18	0	0	1	Susceptible
933	3948	988	ACCase	Lolium	TRUE	Timaru	Lolium multiflorum	Haloxyfop	125	10	0	10	0	0	1	Susceptible
933	3948	988	ACCase	Lolium	TRUE	Timaru	Lolium multiflorum	Pinoxaden	30	10	0	10	0	0	1	Susceptible
933	3948	988	ALS	Lolium	TRUE	Timaru	Lolium multiflorum	Iodosulfuron	7.5	10	0	10	0	0	1	Susceptible
933	3948	988	EPSPS	Lolium	TRUE	Timaru	Lolium multiflorum	Glyphosate	1458	10	0	10	0	0	1	Susceptible
933	3948	989	ACCase	Lolium	TRUE	Timaru	Lolium multiflorum	Haloxyfop	60	16	0	16	0	0	1	Susceptible
933	3948	989	ACCase	Lolium	TRUE	Timaru	Lolium multiflorum	Pinoxaden	30	19	0	19	0	0	1	Susceptible
933	3948	989	ALS	Lolium	TRUE	Timaru	Lolium multiflorum	Iodosulfuron	7.5	19	0	19	0	0	1	Susceptible
933	3948	989	EPSPS	Lolium	TRUE	Timaru	Lolium multiflorum	Glyphosate	1458	6	0	6	0	0	1	Susceptible
933	3948	989	EPSPS	Lolium	TRUE	Timaru	Lolium multiflorum	Glyphosate	1498	16	0	16	0	0	1	Susceptible
933	3948	990	ACCase	Lolium	TRUE	Timaru	Lolium multiflorum	Haloxyfop	125	9	0	9	0	0	1	Susceptible
933	3948	990	ALS	Lolium	TRUE	Timaru	Lolium multiflorum	Iodosulfuron	7.5	8	0	8	0	0	1	Susceptible
933	3948	990	EPSPS	Lolium	TRUE	Timaru	Lolium multiflorum	Glyphosate	1458	10	0	10	0	0	1	Susceptible
933	3948	991	ACCase	Lolium	TRUE	Timaru	Lolium multiflorum	Haloxyfop	125	8	0	8	0	0	1	Susceptible
933	3948	991	ACCase	Lolium	TRUE	Timaru	Lolium multiflorum	Pinoxaden	30	9	0	9	0	0	1	Susceptible
933	3948	991	ALS	Lolium	TRUE	Timaru	Lolium multiflorum	Iodosulfuron	7.5	9	0	9	0	0	1	Susceptible
933	3948	991	EPSPS	Lolium	TRUE	Timaru	Lolium multiflorum	Glyphosate	1458	9	0	9	0	0	1	Susceptible
946	4008	403	ACCase	Bromus	TRUE	Timaru	Bromus hordeaceus	Clethodim	240	16	0	16	0	0	1	Susceptible
946	4008	403	ACCase	Bromus	TRUE	Timaru	Bromus hordeaceus	Haloxyfop	250	15	0	15	0	0	1	Susceptible
946	4008	403	ALS	Bromus	TRUE	Timaru	Bromus hordeaceus	Pyroxsulam	15	12	0	12	0	0	1	Susceptible
946	4008	403	EPSPS	Bromus	TRUE	Timaru	Bromus hordeaceus	Glyphosate	540	14	0	14	0	0	1	Susceptible
946	4008	405	ACCase	Bromus	TRUE	Timaru	Bromus hordeaceus	Clethodim	240	14	0	14	0	0	1	Susceptible
946	4008	405	ACCase	Bromus	TRUE	Timaru	Bromus hordeaceus	Haloxyfop	250	19	0	19	0	0	1	Susceptible
946	4008	405	ALS	Bromus	TRUE	Timaru	Bromus hordeaceus	Pyroxsulam	15	17	0	17	0	0	1	Susceptible
946	4008	405	EPSPS	Bromus	TRUE	Timaru	Bromus hordeaceus	Glyphosate	540	17	0	17	0	0	1	Susceptible
946	4008	418	ACCase	Bromus	TRUE	Timaru	Bromus catharticus	Clethodim	240	15	0	15	0	0	1	Susceptible
946	4008	418	ACCase	Bromus	TRUE	Timaru	Bromus catharticus	Haloxyfop	250	15	0	15	0	0	1	Susceptible
946	4008	418	ALS	Bromus	TRUE	Timaru	Bromus catharticus	Pyroxsulam	15	15	0	15	0	0	1	Susceptible
946	4008	422	ACCase	Bromus	TRUE	Timaru	Bromus catharticus	Clethodim	240	14	0	14	0	0	1	Susceptible
946	4008	422	ACCase	Bromus	TRUE	Timaru	Bromus catharticus	Haloxyfop	250	12	0	12	0	0	1	Susceptible
946	4008	422	ALS	Bromus	TRUE	Timaru	Bromus catharticus	Pyroxsulam	15	15	0	15	0	0	1	Susceptible
946	4008	535	ACCase	Vulpia	TRUE	Timaru	Vulpia bromoides	Clethodim	240	20	0	20	0	0	1	Susceptible
946	4008	535	EPSPS	Vulpia	TRUE	Timaru	Vulpia bromoides	Glyphosate	1458	13	0	13	0	0	1	Susceptible
946	4008	536	EPSPS	Vulpia	TRUE	Timaru	Vulpia bromoides	Glyphosate	1458	8	0	8	0	0	1	Susceptible
946	4008	538	ACCase	Vulpia	TRUE	Timaru	Vulpia bromoides	Clethodim	240	8	0	8	0	0	1	Susceptible
946	4008	538	EPSPS	Vulpia	TRUE	Timaru	Vulpia bromoides	Glyphosate	1458	9	0	9	0	0	1	Susceptible
946	4008	539	ACCase	Vulpia	TRUE	Timaru	Vulpia bromoides	Clethodim	240	12	0	12	0	0	1	Susceptible
946	4008	539	EPSPS	Vulpia	TRUE	Timaru	Vulpia bromoides	Glyphosate	1458	9	0	9	0	0	1	Susceptible
946	4008	540	ACCase	Vulpia	TRUE	Timaru	Vulpia bromoides	Clethodim	240	10	0	10	0	0	1	Susceptible
946	4008	542	ACCase	Vulpia	TRUE	Timaru	Vulpia bromoides	Clethodim	240	13	0	13	0	0	1	Susceptible
946	4008	542	EPSPS	Vulpia	TRUE	Timaru	Vulpia bromoides	Glyphosate	1458	10	0	10	0	0	1	Susceptible
946	4008	543	ACCase	Vulpia	TRUE	Timaru	Vulpia bromoides	Clethodim	240	5	0	5	0	0	1	Susceptible
946	4008	640	ACCase	Bromus	TRUE	Timaru	Bromus hordeaceus	Clethodim	240	15	0	15	0	0	1	Susceptible
946	4008	640	ACCase	Bromus	TRUE	Timaru	Bromus hordeaceus	Haloxyfop	250	7	0	7	0	0	1	Susceptible
946	4008	640	ALS	Bromus	TRUE	Timaru	Bromus hordeaceus	Pyroxsulam	15	16	0	16	0	0	1	Susceptible
946	4008	640	EPSPS	Bromus	TRUE	Timaru	Bromus hordeaceus	Glyphosate	540	13	0	13	0	0	1	Susceptible
946	4008	641	ACCase	Bromus	TRUE	Timaru	Bromus hordeaceus	Clethodim	240	15	0	15	0	0	1	Susceptible
946	4008	641	ACCase	Bromus	TRUE	Timaru	Bromus hordeaceus	Haloxyfop	250	13	0	13	0	0	1	Susceptible
946	4008	641	ALS	Bromus	TRUE	Timaru	Bromus hordeaceus	Pyroxsulam	15	10	0	10	0	0	1	Susceptible
946	4008	641	EPSPS	Bromus	TRUE	Timaru	Bromus hordeaceus	Glyphosate	540	11	0	11	0	0	1	Susceptible
946	4008	643	ACCase	Bromus	TRUE	Timaru	Bromus hordeaceus	Clethodim	240	16	0	16	0	0	1	Susceptible
946	4008	643	ACCase	Bromus	TRUE	Timaru	Bromus hordeaceus	Haloxyfop	250	18	0	18	0	0	1	Susceptible
946	4008	643	ALS	Bromus	TRUE	Timaru	Bromus hordeaceus	Pyroxsulam	15	17	0	17	0	0	1	Susceptible
946	4008	643	EPSPS	Bromus	TRUE	Timaru	Bromus hordeaceus	Glyphosate	540	14	0	14	0	0	1	Susceptible
946	4008	652	ACCase	Bromus	TRUE	Timaru	Bromus hordeaceus	Clethodim	240	17	0	17	0	0	1	Susceptible
946	4008	652	ACCase	Bromus	TRUE	Timaru	Bromus hordeaceus	Haloxyfop	250	17	0	17	0	0	1	Susceptible
946	4008	652	ALS	Bromus	TRUE	Timaru	Bromus hordeaceus	Pyroxsulam	15	15	0	15	0	0	1	Susceptible
946	4008	652	EPSPS	Bromus	TRUE	Timaru	Bromus hordeaceus	Glyphosate	540	14	0	14	0	0	1	Susceptible
946	4008	653	ACCase	Bromus	TRUE	Timaru	Bromus hordeaceus	Clethodim	240	18	0	18	0	0	1	Susceptible
946	4008	653	ACCase	Bromus	TRUE	Timaru	Bromus hordeaceus	Haloxyfop	250	12	0	12	0	0	1	Susceptible
946	4008	653	ALS	Bromus	TRUE	Timaru	Bromus hordeaceus	Pyroxsulam	15	15	0	15	0	0	1	Susceptible
946	4008	653	EPSPS	Bromus	TRUE	Timaru	Bromus hordeaceus	Glyphosate	540	13	0	13	0	0	1	Susceptible
946	4008	722	ACCase	Avena	TRUE	Timaru	Avena fatua	Fenoxaprop	51.75	6	1	5	17	0	1	Susceptible
947	4010	420	ALS	Bromus	TRUE	Timaru	Bromus catharticus	Pyroxsulam	15	10	0	10	0	0	1	Susceptible
947	4010	597	ACCase	Bromus	TRUE	Timaru	Bromus catharticus	Clethodim	240	15	0	15	0	0	1	Susceptible
947	4010	597	ACCase	Bromus	TRUE	Timaru	Bromus catharticus	Haloxyfop	250	15	0	15	0	0	1	Susceptible
947	4010	597	ALS	Bromus	TRUE	Timaru	Bromus catharticus	Pyroxsulam	15	30	14	16	47	1	1	Resistant
947	4010	598	ALS	Bromus	TRUE	Timaru	Bromus catharticus	Pyroxsulam	15	14	8	6	57	1	1	Resistant
947	4010	599	ALS	Bromus	TRUE	Timaru	Bromus catharticus	Pyroxsulam	15	12	0	12	0	0	1	Susceptible
947	4010	600	ALS	Bromus	TRUE	Timaru	Bromus catharticus	Pyroxsulam	15	11	0	11	0	0	1	Susceptible
947	4010	684	ACCase	Avena	TRUE	Timaru	Avena fatua	Fenoxaprop	51.75	18	0	18	0	0	1	Susceptible
947	4010	751	ACCase	Avena	TRUE	Timaru	Avena fatua	Fenoxaprop	51.75	12	0	12	0	0	1	Susceptible
947	4010	751	ALS	Avena	TRUE	Timaru	Avena fatua	Pyroxsulam	30	5	0	5	0	0	1	Susceptible
947	4010	751	EPSPS	Avena	TRUE	Timaru	Avena fatua	Glyphosate	702	14	0	14	0	0	1	Susceptible
947	4010	803	ACCase	Avena	TRUE	Timaru	Avena fatua	Fenoxaprop	51.75	10	8	2	80	1	1	Resistant
947	4010	804	ACCase	Avena	TRUE	Timaru	Avena fatua	Fenoxaprop	51.75	10	4	6	40	1	1	Resistant
947	4010	805	ACCase	Avena	TRUE	Timaru	Avena fatua	Fenoxaprop	51.75	13	13	0	100	1	1	Resistant
947	4010	806	ACCase	Avena	TRUE	Timaru	Avena fatua	Fenoxaprop	51.75	11	11	0	100	1	1	Resistant
947	4010	807	ACCase	Avena	TRUE	Timaru	Avena fatua	Fenoxaprop	51.75	8	8	0	100	1	1	Resistant
947	4010	808	ACCase	Avena	TRUE	Timaru	Avena fatua	Fenoxaprop	51.75	10	10	0	100	1	1	Resistant
947	4010	811	ACCase	Avena	TRUE	Timaru	Avena fatua	Fenoxaprop	51.75	12	12	0	100	1	1	Resistant
947	4010	812	ACCase	Avena	TRUE	Timaru	Avena fatua	Fenoxaprop	51.75	6	6	0	100	1	1	Resistant
947	4010	1169	EPSPS	Lolium	TRUE	Timaru	Lolium perenne	Glyphosate	1458	7	0	7	0	0	1	Susceptible
947	4010	1171	ACCase	Lolium	TRUE	Timaru	Lolium perenne	Haloxyfop	125	5	4	1	80	1	1	Resistant
947	4010	1171	ACCase	Lolium	TRUE	Timaru	Lolium perenne	Pinoxaden	30	5	5	0	100	1	1	Resistant
947	4010	1174	ACCase	Lolium	TRUE	Timaru	Lolium perenne	Haloxyfop	125	6	6	0	100	1	1	Resistant
947	4010	1175	ACCase	Lolium	TRUE	Timaru	Lolium perenne	Haloxyfop	125	6	6	0	100	1	1	Resistant
947	4010	1176	EPSPS	Lolium	TRUE	Timaru	Lolium perenne	Glyphosate	1458	7	0	7	0	0	1	Susceptible
947	4010	1177	ACCase	Lolium	TRUE	Timaru	Lolium hybridum	Haloxyfop	60	12	5	7	42	1	1	Resistant
947	4010	1177	ACCase	Lolium	TRUE	Timaru	Lolium hybridum	Pinoxaden	30	8	6	2	75	1	1	Resistant
947	4010	1177	ALS	Lolium	TRUE	Timaru	Lolium hybridum	Iodosulfuron	7.5	15	0	15	0	0	1	Susceptible
947	4010	1177	EPSPS	Lolium	TRUE	Timaru	Lolium hybridum	Glyphosate	1458	10	0	10	0	0	1	Susceptible
947	4010	1180	ACCase	Lolium	TRUE	Timaru	Lolium perenne	Haloxyfop	125	11	8	3	73	1	1	Resistant
947	4010	1180	ACCase	Lolium	TRUE	Timaru	Lolium perenne	Pinoxaden	30	12	7	5	58	1	1	Resistant
947	4010	1180	ALS	Lolium	TRUE	Timaru	Lolium perenne	Iodosulfuron	7.5	16	14	2	88	1	1	Resistant
947	4010	1180	EPSPS	Lolium	TRUE	Timaru	Lolium perenne	Glyphosate	1458	17	0	17	0	0	1	Susceptible
947	4010	1181	ACCase	Lolium	TRUE	Timaru	Lolium perenne	Haloxyfop	60	13	11	2	85	1	1	Resistant
947	4010	1181	ACCase	Lolium	TRUE	Timaru	Lolium perenne	Pinoxaden	30	13	12	1	92	1	1	Resistant
947	4010	1181	ALS	Lolium	TRUE	Timaru	Lolium perenne	Iodosulfuron	7.5	16	14	2	88	1	1	Resistant
947	4010	1181	EPSPS	Lolium	TRUE	Timaru	Lolium perenne	Glyphosate	1458	14	0	14	0	0	1	Susceptible
947	4010	1182	ACCase	Lolium	TRUE	Timaru	Lolium perenne	Haloxyfop	60	14	11	3	79	1	1	Resistant
947	4010	1182	ACCase	Lolium	TRUE	Timaru	Lolium perenne	Pinoxaden	30	12	7	5	58	1	1	Resistant
947	4010	1182	ALS	Lolium	TRUE	Timaru	Lolium perenne	Iodosulfuron	7.5	17	7	10	41	1	1	Resistant
947	4010	1182	EPSPS	Lolium	TRUE	Timaru	Lolium perenne	Glyphosate	1458	13	0	13	0	0	1	Susceptible
947	4010	1183	ACCase	Lolium	TRUE	Timaru	Lolium perenne	Haloxyfop	125	7	2	5	29	0	1	Susceptible
947	4010	1183	ACCase	Lolium	TRUE	Timaru	Lolium perenne	Pinoxaden	30	9	8	1	89	1	1	Resistant
947	4010	1183	ALS	Lolium	TRUE	Timaru	Lolium perenne	Iodosulfuron	7.5	6	5	1	83	1	1	Resistant
947	4010	1183	EPSPS	Lolium	TRUE	Timaru	Lolium perenne	Glyphosate	1458	8	0	8	0	0	1	Susceptible
947	4010	1186	ACCase	Lolium	TRUE	Timaru	Lolium perenne	Haloxyfop	125	15	0	15	0	0	1	Susceptible
947	4010	1186	ACCase	Lolium	TRUE	Timaru	Lolium perenne	Pinoxaden	30	15	2	13	13	0	1	Susceptible
947	4010	1186	ALS	Lolium	TRUE	Timaru	Lolium perenne	Iodosulfuron	7.5	13	0	13	0	0	1	Susceptible
947	4010	1186	EPSPS	Lolium	TRUE	Timaru	Lolium perenne	Glyphosate	1458	13	0	13	0	0	1	Susceptible
947	4010	1189	ALS	Lolium	TRUE	Timaru	Lolium hybridum	Iodosulfuron	7.5	20	0	20	0	0	1	Susceptible
947	4010	1189	EPSPS	Lolium	TRUE	Timaru	Lolium hybridum	Glyphosate	1458	14	0	14	0	0	1	Susceptible
947	4010	1190	ACCase	Lolium	TRUE	Timaru	Lolium hybridum	Pinoxaden	30	7	0	7	0	0	1	Susceptible
947	4010	1191	ACCase	Lolium	TRUE	Timaru	Lolium multiflorum	Haloxyfop	60	11	0	11	0	0	1	Susceptible
947	4010	1191	ACCase	Lolium	TRUE	Timaru	Lolium multiflorum	Pinoxaden	30	14	0	14	0	0	1	Susceptible
947	4010	1191	ALS	Lolium	TRUE	Timaru	Lolium multiflorum	Iodosulfuron	7.5	12	0	12	0	0	1	Susceptible
947	4010	1191	EPSPS	Lolium	TRUE	Timaru	Lolium multiflorum	Glyphosate	1498	9	0	9	0	0	1	Susceptible
947	4010	1192	ACCase	Lolium	TRUE	Timaru	Lolium multiflorum	Haloxyfop	125	7	0	7	0	0	1	Susceptible
947	4010	1192	ACCase	Lolium	TRUE	Timaru	Lolium multiflorum	Pinoxaden	30	7	0	7	0	0	1	Susceptible
947	4010	1192	ALS	Lolium	TRUE	Timaru	Lolium multiflorum	Iodosulfuron	7.5	9	0	9	0	0	1	Susceptible
947	4010	1192	EPSPS	Lolium	TRUE	Timaru	Lolium multiflorum	Glyphosate	1458	9	0	9	0	0	1	Susceptible
954	4030	399	ACCase	Bromus	TRUE	Timaru	Bromus hordeaceus	Clethodim	240	6	0	6	0	0	1	Susceptible
954	4030	399	ACCase	Bromus	TRUE	Timaru	Bromus hordeaceus	Haloxyfop	250	9	0	9	0	0	1	Susceptible
954	4030	399	ALS	Bromus	TRUE	Timaru	Bromus hordeaceus	Pyroxsulam	15	10	0	10	0	0	1	Susceptible
954	4030	399	EPSPS	Bromus	TRUE	Timaru	Bromus hordeaceus	Glyphosate	540	6	0	6	0	0	1	Susceptible
954	4030	404	ACCase	Bromus	TRUE	Timaru	Bromus hordeaceus	Clethodim	240	11	0	11	0	0	1	Susceptible
954	4030	404	ACCase	Bromus	TRUE	Timaru	Bromus hordeaceus	Haloxyfop	250	14	0	14	0	0	1	Susceptible
954	4030	404	ALS	Bromus	TRUE	Timaru	Bromus hordeaceus	Pyroxsulam	15	7	0	7	0	0	1	Susceptible
954	4030	404	EPSPS	Bromus	TRUE	Timaru	Bromus hordeaceus	Glyphosate	540	12	0	12	0	0	1	Susceptible
954	4030	409	ACCase	Bromus	TRUE	Timaru	Bromus diandrus	Clethodim	120	11	0	11	0	0	1	Susceptible
954	4030	409	ACCase	Bromus	TRUE	Timaru	Bromus diandrus	Haloxyfop	250	11	0	11	0	0	1	Susceptible
954	4030	409	ALS	Bromus	TRUE	Timaru	Bromus diandrus	Pyroxsulam	15	8	0	8	0	0	1	Susceptible
954	4030	409	EPSPS	Bromus	TRUE	Timaru	Bromus diandrus	Glyphosate	540	9	0	9	0	0	1	Susceptible
954	4030	621	ACCase	Bromus	TRUE	Timaru	Bromus diandrus	Clethodim	120	5	0	5	0	0	1	Susceptible
954	4030	621	ALS	Bromus	TRUE	Timaru	Bromus diandrus	Pyroxsulam	15	5	0	5	0	0	1	Susceptible
954	4030	622	ACCase	Bromus	TRUE	Timaru	Bromus diandrus	Clethodim	120	14	0	14	0	0	1	Susceptible
954	4030	622	ACCase	Bromus	TRUE	Timaru	Bromus diandrus	Haloxyfop	250	15	0	15	0	0	1	Susceptible
954	4030	622	ALS	Bromus	TRUE	Timaru	Bromus diandrus	Pyroxsulam	15	13	0	13	0	0	1	Susceptible
954	4030	622	EPSPS	Bromus	TRUE	Timaru	Bromus diandrus	Glyphosate	540	15	0	15	0	0	1	Susceptible
954	4030	623	ACCase	Bromus	TRUE	Timaru	Bromus diandrus	Clethodim	120	15	0	15	0	0	1	Susceptible
954	4030	623	ACCase	Bromus	TRUE	Timaru	Bromus diandrus	Haloxyfop	250	15	0	15	0	0	1	Susceptible
954	4030	623	ALS	Bromus	TRUE	Timaru	Bromus diandrus	Pyroxsulam	15	15	0	15	0	0	1	Susceptible
954	4030	623	EPSPS	Bromus	TRUE	Timaru	Bromus diandrus	Glyphosate	540	15	0	15	0	0	1	Susceptible
954	4030	634	ACCase	Bromus	TRUE	Timaru	Bromus hordeaceus	Clethodim	240	10	0	10	0	0	1	Susceptible
954	4030	634	ACCase	Bromus	TRUE	Timaru	Bromus hordeaceus	Haloxyfop	250	12	0	12	0	0	1	Susceptible
954	4030	634	ALS	Bromus	TRUE	Timaru	Bromus hordeaceus	Pyroxsulam	15	13	0	13	0	0	1	Susceptible
954	4030	634	EPSPS	Bromus	TRUE	Timaru	Bromus hordeaceus	Glyphosate	540	11	0	11	0	0	1	Susceptible
954	4030	635	ACCase	Bromus	TRUE	Timaru	Bromus hordeaceus	Clethodim	240	10	0	10	0	0	1	Susceptible
954	4030	635	ACCase	Bromus	TRUE	Timaru	Bromus hordeaceus	Haloxyfop	250	8	0	8	0	0	1	Susceptible
954	4030	635	ALS	Bromus	TRUE	Timaru	Bromus hordeaceus	Pyroxsulam	15	11	0	11	0	0	1	Susceptible
954	4030	635	EPSPS	Bromus	TRUE	Timaru	Bromus hordeaceus	Glyphosate	540	9	0	9	0	0	1	Susceptible
954	4030	636	ACCase	Bromus	TRUE	Timaru	Bromus hordeaceus	Clethodim	240	6	0	6	0	0	1	Susceptible
954	4030	636	ACCase	Bromus	TRUE	Timaru	Bromus hordeaceus	Haloxyfop	250	9	0	9	0	0	1	Susceptible
954	4030	636	ALS	Bromus	TRUE	Timaru	Bromus hordeaceus	Pyroxsulam	15	5	0	5	0	0	1	Susceptible
954	4030	636	EPSPS	Bromus	TRUE	Timaru	Bromus hordeaceus	Glyphosate	540	11	0	11	0	0	1	Susceptible
954	4030	638	ACCase	Bromus	TRUE	Timaru	Bromus hordeaceus	Clethodim	240	17	0	17	0	0	1	Susceptible
954	4030	638	ACCase	Bromus	TRUE	Timaru	Bromus hordeaceus	Haloxyfop	250	12	0	12	0	0	1	Susceptible
954	4030	638	ALS	Bromus	TRUE	Timaru	Bromus hordeaceus	Pyroxsulam	15	17	0	17	0	0	1	Susceptible
954	4030	638	EPSPS	Bromus	TRUE	Timaru	Bromus hordeaceus	Glyphosate	540	10	0	10	0	0	1	Susceptible
954	4030	639	ACCase	Bromus	TRUE	Timaru	Bromus hordeaceus	Haloxyfop	250	12	0	12	0	0	1	Susceptible
954	4030	639	ALS	Bromus	TRUE	Timaru	Bromus hordeaceus	Pyroxsulam	15	7	0	7	0	0	1	Susceptible
954	4030	639	EPSPS	Bromus	TRUE	Timaru	Bromus hordeaceus	Glyphosate	540	12	0	12	0	0	1	Susceptible
954	4030	645	ACCase	Bromus	TRUE	Timaru	Bromus hordeaceus	Clethodim	240	9	0	9	0	0	1	Susceptible
954	4030	645	ACCase	Bromus	TRUE	Timaru	Bromus hordeaceus	Haloxyfop	250	11	0	11	0	0	1	Susceptible
954	4030	645	ALS	Bromus	TRUE	Timaru	Bromus hordeaceus	Pyroxsulam	15	9	0	9	0	0	1	Susceptible
954	4030	645	EPSPS	Bromus	TRUE	Timaru	Bromus hordeaceus	Glyphosate	540	10	0	10	0	0	1	Susceptible
954	4030	646	ACCase	Bromus	TRUE	Timaru	Bromus hordeaceus	Clethodim	240	8	0	8	0	0	1	Susceptible
954	4030	646	ACCase	Bromus	TRUE	Timaru	Bromus hordeaceus	Haloxyfop	250	5	0	5	0	0	1	Susceptible
954	4030	646	EPSPS	Bromus	TRUE	Timaru	Bromus hordeaceus	Glyphosate	540	6	0	6	0	0	1	Susceptible
954	4030	647	ACCase	Bromus	TRUE	Timaru	Bromus hordeaceus	Clethodim	240	15	0	15	0	0	1	Susceptible
954	4030	647	ACCase	Bromus	TRUE	Timaru	Bromus hordeaceus	Haloxyfop	250	8	0	8	0	0	1	Susceptible
954	4030	647	ALS	Bromus	TRUE	Timaru	Bromus hordeaceus	Pyroxsulam	15	11	0	11	0	0	1	Susceptible
954	4030	647	EPSPS	Bromus	TRUE	Timaru	Bromus hordeaceus	Glyphosate	540	10	0	10	0	0	1	Susceptible
954	4030	648	ACCase	Bromus	TRUE	Timaru	Bromus hordeaceus	Clethodim	240	8	0	8	0	0	1	Susceptible
954	4030	648	ACCase	Bromus	TRUE	Timaru	Bromus hordeaceus	Haloxyfop	250	7	0	7	0	0	1	Susceptible
954	4030	648	ALS	Bromus	TRUE	Timaru	Bromus hordeaceus	Pyroxsulam	15	8	0	8	0	0	1	Susceptible
954	4030	648	EPSPS	Bromus	TRUE	Timaru	Bromus hordeaceus	Glyphosate	540	9	0	9	0	0	1	Susceptible
954	4030	650	ACCase	Bromus	TRUE	Timaru	Bromus hordeaceus	Clethodim	240	5	0	5	0	0	1	Susceptible
954	4030	650	ACCase	Bromus	TRUE	Timaru	Bromus hordeaceus	Haloxyfop	250	7	0	7	0	0	1	Susceptible
954	4030	650	ALS	Bromus	TRUE	Timaru	Bromus hordeaceus	Pyroxsulam	15	5	0	5	0	0	1	Susceptible
954	4030	650	EPSPS	Bromus	TRUE	Timaru	Bromus hordeaceus	Glyphosate	540	5	0	5	0	0	1	Susceptible
954	4030	651	ACCase	Bromus	TRUE	Timaru	Bromus hordeaceus	Clethodim	240	18	0	18	0	0	1	Susceptible
954	4030	651	ACCase	Bromus	TRUE	Timaru	Bromus hordeaceus	Haloxyfop	250	16	0	16	0	0	1	Susceptible
954	4030	651	ALS	Bromus	TRUE	Timaru	Bromus hordeaceus	Pyroxsulam	15	16	0	16	0	0	1	Susceptible
954	4030	651	EPSPS	Bromus	TRUE	Timaru	Bromus hordeaceus	Glyphosate	540	15	0	15	0	0	1	Susceptible
955	4031	402	ACCase	Bromus	TRUE	Timaru	Bromus hordeaceus	Clethodim	240	16	0	16	0	0	1	Susceptible
955	4031	402	ACCase	Bromus	TRUE	Timaru	Bromus hordeaceus	Haloxyfop	250	14	0	14	0	0	1	Susceptible
955	4031	402	ALS	Bromus	TRUE	Timaru	Bromus hordeaceus	Pyroxsulam	15	17	0	17	0	0	1	Susceptible
955	4031	402	EPSPS	Bromus	TRUE	Timaru	Bromus hordeaceus	Glyphosate	540	17	0	17	0	0	1	Susceptible
955	4031	412	ACCase	Bromus	TRUE	Timaru	Bromus diandrus	Clethodim	120	11	0	11	0	0	1	Susceptible
955	4031	412	ACCase	Bromus	TRUE	Timaru	Bromus diandrus	Haloxyfop	250	14	0	14	0	0	1	Susceptible
955	4031	412	ALS	Bromus	TRUE	Timaru	Bromus diandrus	Pyroxsulam	15	12	0	12	0	0	1	Susceptible
955	4031	412	EPSPS	Bromus	TRUE	Timaru	Bromus diandrus	Glyphosate	540	14	0	14	0	0	1	Susceptible
955	4031	620	ACCase	Bromus	TRUE	Timaru	Bromus diandrus	Clethodim	120	10	0	10	0	0	1	Susceptible
955	4031	620	ACCase	Bromus	TRUE	Timaru	Bromus diandrus	Haloxyfop	250	13	0	13	0	0	1	Susceptible
955	4031	620	ALS	Bromus	TRUE	Timaru	Bromus diandrus	Pyroxsulam	15	9	0	9	0	0	1	Susceptible
955	4031	620	EPSPS	Bromus	TRUE	Timaru	Bromus diandrus	Glyphosate	540	12	0	12	0	0	1	Susceptible
991	4166	38	ACCase	Bromus	TRUE	Lincoln	Bromus diandrus	Clethodim	120	26	0	26	0	0	1	Susceptible
991	4166	38	ACCase	Bromus	TRUE	Lincoln	Bromus diandrus	Haloxyfop	60	49	0	49	0	0	1	Susceptible
991	4166	38	ALS	Bromus	TRUE	Lincoln	Bromus diandrus	Pyroxsulam	15	58	0	58	0	0	1	Susceptible
991	4166	38	EPSPS	Bromus	TRUE	Lincoln	Bromus diandrus	Glyphosate	1458	30	0	30	0	0	1	Susceptible
1049	4386	433	ACCase	Phalaris	TRUE	Timaru	Phalaris minor	Clethodim	240	16	0	16	0	0	1	Susceptible
1049	4386	433	ACCase	Phalaris	TRUE	Timaru	Phalaris minor	Pinoxaden	30	6	0	6	0	0	1	Susceptible
1049	4386	433	ALS	Phalaris	TRUE	Timaru	Phalaris minor	Clodinafop	24	18	0	18	0	0	1	Susceptible
1049	4386	433	ALS	Phalaris	TRUE	Timaru	Phalaris minor	Iodosulfuron	7.5	14	0	14	0	0	1	Susceptible
1049	4386	433	EPSPS	Phalaris	TRUE	Timaru	Phalaris minor	Glyphosate	702	16	0	16	0	0	1	Susceptible
1049	4386	438	ACCase	Vulpia	TRUE	Timaru	Vulpia bromoides	Clethodim	240	19	0	19	0	0	1	Susceptible
1049	4386	438	EPSPS	Vulpia	TRUE	Timaru	Vulpia bromoides	Glyphosate	1458	16	0	16	0	0	1	Susceptible
1049	4386	441	ACCase	Vulpia	TRUE	Timaru	Vulpia bromoides	Clethodim	240	12	0	12	0	0	1	Susceptible
1049	4386	441	EPSPS	Vulpia	TRUE	Timaru	Vulpia bromoides	Glyphosate	1458	11	0	11	0	0	1	Susceptible
1049	4386	442	ACCase	Vulpia	TRUE	Timaru	Vulpia bromoides	Clethodim	240	17	0	17	0	0	1	Susceptible
1049	4386	442	EPSPS	Vulpia	TRUE	Timaru	Vulpia bromoides	Glyphosate	1458	13	0	13	0	0	1	Susceptible
1049	4386	557	ACCase	Vulpia	TRUE	Timaru	Vulpia bromoides	Clethodim	240	15	0	15	0	0	1	Susceptible
1049	4386	557	EPSPS	Vulpia	TRUE	Timaru	Vulpia bromoides	Glyphosate	1458	9	0	9	0	0	1	Susceptible
1049	4386	558	ACCase	Vulpia	TRUE	Timaru	Vulpia bromoides	Clethodim	240	9	0	9	0	0	1	Susceptible
1049	4386	617	ACCase	Bromus	TRUE	Timaru	Bromus diandrus	Clethodim	120	12	0	12	0	0	1	Susceptible
1049	4386	617	ACCase	Bromus	TRUE	Timaru	Bromus diandrus	Haloxyfop	250	12	0	12	0	0	1	Susceptible
1049	4386	617	ALS	Bromus	TRUE	Timaru	Bromus diandrus	Pyroxsulam	15	12	0	12	0	0	1	Susceptible
1049	4386	617	EPSPS	Bromus	TRUE	Timaru	Bromus diandrus	Glyphosate	540	11	0	11	0	0	1	Susceptible
1049	4386	1135	ACCase	Lolium	TRUE	Timaru	Lolium perenne	Clethodim	120	17	0	17	0	0	1	Susceptible
1049	4386	1135	ACCase	Lolium	TRUE	Timaru	Lolium perenne	Haloxyfop	125	9	0	9	0	0	1	Susceptible
1049	4386	1135	ACCase	Lolium	TRUE	Timaru	Lolium perenne	Haloxyfop	60	14	0	14	0	0	1	Susceptible
1049	4386	1135	ACCase	Lolium	TRUE	Timaru	Lolium perenne	Pinoxaden	30	26	0	26	0	0	1	Susceptible
1049	4386	1135	ALS	Lolium	TRUE	Timaru	Lolium perenne	Iodosulfuron	7.5	14	0	14	0	0	1	Susceptible
1049	4386	1135	ALS	Lolium	TRUE	Timaru	Lolium perenne	Pyroxsulam	15	17	11	6	65	1	1	Resistant
1049	4386	1135	EPSPS	Lolium	TRUE	Timaru	Lolium perenne	Glyphosate	1458	33	0	33	0	0	1	Susceptible
1049	4386	1136	ACCase	Lolium	TRUE	Timaru	Lolium perenne	Haloxyfop	125	15	0	15	0	0	1	Susceptible
1049	4386	1136	ACCase	Lolium	TRUE	Timaru	Lolium perenne	Pinoxaden	30	14	0	14	0	0	1	Susceptible
1049	4386	1136	ALS	Lolium	TRUE	Timaru	Lolium perenne	Iodosulfuron	7.5	8	0	8	0	0	1	Susceptible
1049	4386	1136	EPSPS	Lolium	TRUE	Timaru	Lolium perenne	Glyphosate	1458	12	0	12	0	0	1	Susceptible
1049	4386	1139	ACCase	Lolium	TRUE	Timaru	Lolium perenne	Haloxyfop	125	19	0	19	0	0	1	Susceptible
1049	4386	1139	ACCase	Lolium	TRUE	Timaru	Lolium perenne	Pinoxaden	30	17	0	17	0	0	1	Susceptible
1049	4386	1139	ALS	Lolium	TRUE	Timaru	Lolium perenne	Iodosulfuron	7.5	15	1	14	7	0	1	Susceptible
1049	4386	1140	ACCase	Lolium	TRUE	Timaru	Lolium perenne	Haloxyfop	125	9	0	9	0	0	1	Susceptible
1049	4386	1140	ACCase	Lolium	TRUE	Timaru	Lolium perenne	Pinoxaden	30	10	0	10	0	0	1	Susceptible
1049	4386	1140	ALS	Lolium	TRUE	Timaru	Lolium perenne	Iodosulfuron	7.5	6	0	6	0	0	1	Susceptible
1049	4386	1140	EPSPS	Lolium	TRUE	Timaru	Lolium perenne	Glyphosate	1458	9	0	9	0	0	1	Susceptible
1049	4386	1141	ACCase	Lolium	TRUE	Timaru	Lolium perenne	Haloxyfop	125	14	0	14	0	0	1	Susceptible
1049	4386	1141	ACCase	Lolium	TRUE	Timaru	Lolium perenne	Pinoxaden	30	17	0	17	0	0	1	Susceptible
1049	4386	1141	ALS	Lolium	TRUE	Timaru	Lolium perenne	Iodosulfuron	7.5	7	0	7	0	0	1	Susceptible
1049	4386	1141	EPSPS	Lolium	TRUE	Timaru	Lolium perenne	Glyphosate	1458	16	0	16	0	0	1	Susceptible
1049	4386	1142	ACCase	Lolium	TRUE	Timaru	Lolium perenne	Haloxyfop	125	6	0	6	0	0	1	Susceptible
1049	4386	1142	EPSPS	Lolium	TRUE	Timaru	Lolium perenne	Glyphosate	1458	5	0	5	0	0	1	Susceptible
1050	4387	424	ACCase	Bromus	TRUE	Timaru	Bromus catharticus	Clethodim	240	15	0	15	0	0	1	Susceptible
1050	4387	424	ACCase	Bromus	TRUE	Timaru	Bromus catharticus	Haloxyfop	250	15	0	15	0	0	1	Susceptible
1050	4387	424	ALS	Bromus	TRUE	Timaru	Bromus catharticus	Pyroxsulam	15	14	0	14	0	0	1	Susceptible
1050	4387	461	ALS	Sonchus	TRUE	Timaru	Sonchus asper	Chlorsulfuron	15	7	7	0	100	1	1	Resistant
1050	4387	461	EPSPS	Sonchus	TRUE	Timaru	Sonchus asper	Glyphosate	1458	9	0	9	0	0	1	Susceptible
1088	4543	37	ACCase	Lolium	TRUE	Lincoln	Lolium perenne	Haloxyfop	60	87	3	84	3	0	1	Susceptible
1088	4543	37	ACCase	Lolium	TRUE	Lincoln	Lolium perenne	Pinoxaden	30	23	0	23	0	0	1	Susceptible
1088	4543	37	ALS	Lolium	TRUE	Lincoln	Lolium perenne	Pyroxsulam	15	20	7	13	35	1	1	Resistant
1088	4543	37	EPSPS	Lolium	TRUE	Lincoln	Lolium perenne	Glyphosate	1458	15	0	15	0	0	1	Susceptible
1088	4543	515	ALS	Sonchus	TRUE	Lincoln	Sonchus oleraceus	Chlorsulfuron	15	11	0	11	0	0	1	Susceptible
1088	4543	515	EPSPS	Sonchus	TRUE	Lincoln	Sonchus oleraceus	Glyphosate	1458	10	0	10	0	0	1	Susceptible
1090	4549	31	ACCase	Lolium	TRUE	Lincoln	Lolium perenne	Haloxyfop	60	23	0	23	0	0	1	Susceptible
1090	4549	31	ACCase	Lolium	TRUE	Lincoln	Lolium perenne	Pinoxaden	30	11	0	11	0	0	1	Susceptible
1090	4549	31	ALS	Lolium	TRUE	Lincoln	Lolium perenne	Iodosulfuron	7.5	31	1	30	3	0	1	Susceptible
1090	4549	31	ALS	Lolium	TRUE	Lincoln	Lolium perenne	Pyroxsulam	15	18	12	6	67	1	1	Resistant
1090	4549	31	EPSPS	Lolium	TRUE	Lincoln	Lolium perenne	Glyphosate	1458	12	0	12	0	0	1	Susceptible
1090	4549	32	ACCase	Bromus	TRUE	Lincoln	Bromus hordeaceus	Clethodim	120	79	0	79	0	0	1	Susceptible
1090	4549	32	ACCase	Bromus	TRUE	Lincoln	Bromus hordeaceus	Haloxyfop	60	114	0	114	0	0	1	Susceptible
1090	4549	32	EPSPS	Bromus	TRUE	Lincoln	Bromus hordeaceus	Glyphosate	1458	113	0	113	0	0	1	Susceptible
1090	4549	33	ALS	Lolium	TRUE	Lincoln	Lolium perenne	Pyroxsulam	15	42	5	37	12	1	1	Resistant
1090	4549	33	EPSPS	Lolium	TRUE	Lincoln	Lolium perenne	Glyphosate	1458	25	0	25	0	0	1	Susceptible
1090	4549	33	EPSPS	Lolium	TRUE	Lincoln	Lolium perenne	Glyphosate	1498	67	0	67	0	0	1	Susceptible
1090	4549	34	ACCase	Lolium	TRUE	Lincoln	Lolium perenne	Clethodim	120	22	0	22	0	0	1	Susceptible
1090	4549	34	ACCase	Lolium	TRUE	Lincoln	Lolium perenne	Haloxyfop	60	68	0	68	0	0	1	Susceptible
1090	4549	34	ACCase	Lolium	TRUE	Lincoln	Lolium perenne	Pinoxaden	30	48	0	48	0	0	1	Susceptible
1090	4549	34	ALS	Lolium	TRUE	Lincoln	Lolium perenne	Iodosulfuron	7.5	23	0	23	0	0	1	Susceptible
1090	4549	34	ALS	Lolium	TRUE	Lincoln	Lolium perenne	Pyroxsulam	15	43	0	43	0	0	1	Susceptible
1090	4549	34	EPSPS	Lolium	TRUE	Lincoln	Lolium perenne	Glyphosate	1458	79	0	79	0	0	1	Susceptible
1090	4549	35	ACCase	Lolium	TRUE	Lincoln	Lolium perenne	Haloxyfop	60	14	0	14	0	0	1	Susceptible
1090	4549	35	ACCase	Lolium	TRUE	Lincoln	Lolium perenne	Pinoxaden	30	10	0	10	0	0	1	Susceptible
1090	4549	35	ALS	Lolium	TRUE	Lincoln	Lolium perenne	Iodosulfuron	7.5	11	0	11	0	0	1	Susceptible
1090	4549	35	ALS	Lolium	TRUE	Lincoln	Lolium perenne	Pyroxsulam	15	26	16	10	62	1	1	Resistant
1090	4549	35	EPSPS	Lolium	TRUE	Lincoln	Lolium perenne	Glyphosate	1458	5	0	5	0	0	1	Susceptible
1090	4549	36	ACCase	Bromus	TRUE	Lincoln	Bromus hordeaceus	Clethodim	120	70	0	70	0	0	1	Susceptible
1090	4549	36	ACCase	Bromus	TRUE	Lincoln	Bromus hordeaceus	Haloxyfop	60	203	0	203	0	0	1	Susceptible
1090	4549	36	EPSPS	Bromus	TRUE	Lincoln	Bromus hordeaceus	Glyphosate	1458	112	0	112	0	0	1	Susceptible
1090	4549	477	ALS	Sonchus	TRUE	Lincoln	Sonchus asper	Chlorsulfuron	15	12	0	12	0	0	1	Susceptible
1090	4549	477	EPSPS	Sonchus	TRUE	Lincoln	Sonchus asper	Glyphosate	1458	12	0	12	0	0	1	Susceptible
1090	4549	508	ALS	Sonchus	TRUE	Lincoln	Sonchus oleraceus	Chlorsulfuron	15	13	13	0	100	1	1	Resistant
1090	4549	508	EPSPS	Sonchus	TRUE	Lincoln	Sonchus oleraceus	Glyphosate	1458	17	0	17	0	0	1	Susceptible
1090	4549	510	ALS	Sonchus	TRUE	Lincoln	Sonchus asper	Chlorsulfuron	15	16	13	3	81	1	1	Resistant
1090	4549	510	EPSPS	Sonchus	TRUE	Lincoln	Sonchus asper	Glyphosate	1458	12	0	12	0	0	1	Susceptible
1182	5093	30	ACCase	Avena	TRUE	Lincoln	Avena fatua	Clethodim	120	46	0	46	0	0	1	Susceptible
1182	5093	30	ACCase	Avena	TRUE	Lincoln	Avena fatua	Fenoxaprop	51.75	5	0	5	0	0	1	Susceptible
1182	5093	30	ACCase	Avena	TRUE	Lincoln	Avena fatua	Haloxyfop	52	11	0	11	0	0	1	Susceptible
1182	5093	30	ACCase	Avena	TRUE	Lincoln	Avena fatua	Haloxyfop	60	11	0	11	0	0	1	Susceptible
1182	5093	30	ACCase	Avena	TRUE	Lincoln	Avena fatua	Pinoxaden	25	16	0	16	0	0	1	Susceptible
1182	5093	30	EPSPS	Avena	TRUE	Lincoln	Avena fatua	Glyphosate	1458	7	0	7	0	0	1	Susceptible
1207	5494	352	ALS	Avena	TRUE	Timaru	Avena fatua	Pyroxsulam	30	9	0	9	0	0	1	Susceptible
1207	5494	446	ALS	Sonchus	TRUE	Timaru	Sonchus asper	Chlorsulfuron	15	12	12	0	100	1	1	Resistant
1207	5494	446	EPSPS	Sonchus	TRUE	Timaru	Sonchus asper	Glyphosate	1458	13	0	13	0	0	1	Susceptible
1207	5494	487	ACCase	Phalaris	TRUE	Timaru	Phalaris minor	Clethodim	240	14	0	14	0	0	1	Susceptible
1207	5494	487	ACCase	Phalaris	TRUE	Timaru	Phalaris minor	Pinoxaden	30	11	0	11	0	0	1	Susceptible
1207	5494	487	ALS	Phalaris	TRUE	Timaru	Phalaris minor	Clodinafop	24	9	0	9	0	0	1	Susceptible
1207	5494	487	ALS	Phalaris	TRUE	Timaru	Phalaris minor	Iodosulfuron	7.5	10	2	8	20	0	1	Susceptible
1207	5494	487	EPSPS	Phalaris	TRUE	Timaru	Phalaris minor	Glyphosate	702	13	0	13	0	0	1	Susceptible
1207	5494	741	ACCase	Avena	TRUE	Timaru	Avena fatua	Fenoxaprop	51.75	12	0	12	0	0	1	Susceptible
1207	5494	741	ALS	Avena	TRUE	Timaru	Avena fatua	Pyroxsulam	15	10	0	10	0	0	1	Susceptible
1207	5494	741	EPSPS	Avena	TRUE	Timaru	Avena fatua	Glyphosate	702	12	0	12	0	0	1	Susceptible
1207	5494	742	ACCase	Avena	TRUE	Timaru	Avena fatua	Clethodim	120	12	0	12	0	0	1	Susceptible
1207	5494	742	ACCase	Avena	TRUE	Timaru	Avena fatua	Fenoxaprop	51.75	15	0	15	0	0	1	Susceptible
1207	5494	742	ACCase	Avena	TRUE	Timaru	Avena fatua	Pinoxaden	30	12	0	12	0	0	1	Susceptible
1207	5494	742	ALS	Avena	TRUE	Timaru	Avena fatua	Pyroxsulam	30	9	0	9	0	0	1	Susceptible
1207	5494	742	EPSPS	Avena	TRUE	Timaru	Avena fatua	Glyphosate	702	15	0	15	0	0	1	Susceptible
1207	5494	743	ALS	Avena	TRUE	Timaru	Avena fatua	Pyroxsulam	30	10	0	10	0	0	1	Susceptible
1207	5494	744	ACCase	Avena	TRUE	Timaru	Avena fatua	Clethodim	120	15	0	15	0	0	1	Susceptible
1207	5494	744	ACCase	Avena	TRUE	Timaru	Avena fatua	Fenoxaprop	51.75	12	0	12	0	0	1	Susceptible
1207	5494	744	ACCase	Avena	TRUE	Timaru	Avena fatua	Pinoxaden	30	15	0	15	0	0	1	Susceptible
1207	5494	744	EPSPS	Avena	TRUE	Timaru	Avena fatua	Glyphosate	702	15	0	15	0	0	1	Susceptible
1207	5494	745	ACCase	Avena	TRUE	Timaru	Avena fatua	Clethodim	120	15	0	15	0	0	1	Susceptible
1207	5494	745	ACCase	Avena	TRUE	Timaru	Avena fatua	Fenoxaprop	51.75	15	0	15	0	0	1	Susceptible
1207	5494	745	ACCase	Avena	TRUE	Timaru	Avena fatua	Pinoxaden	30	14	0	14	0	0	1	Susceptible
1207	5494	745	ALS	Avena	TRUE	Timaru	Avena fatua	Pyroxsulam	30	9	0	9	0	0	1	Susceptible
1207	5494	745	EPSPS	Avena	TRUE	Timaru	Avena fatua	Glyphosate	1458	5	0	5	0	0	1	Susceptible
1207	5494	746	ACCase	Avena	TRUE	Timaru	Avena fatua	Fenoxaprop	51.75	13	0	13	0	0	1	Susceptible
1207	5494	746	ALS	Avena	TRUE	Timaru	Avena fatua	Pyroxsulam	15	10	1	9	10	0	1	Susceptible
1207	5494	747	ACCase	Avena	TRUE	Timaru	Avena fatua	Fenoxaprop	51.75	16	0	16	0	0	1	Susceptible
1207	5494	748	ACCase	Avena	TRUE	Timaru	Avena fatua	Fenoxaprop	51.75	13	0	13	0	0	1	Susceptible
1207	5494	748	ALS	Avena	TRUE	Timaru	Avena fatua	Pyroxsulam	30	8	0	8	0	0	1	Susceptible
1207	5494	748	EPSPS	Avena	TRUE	Timaru	Avena fatua	Glyphosate	702	13	0	13	0	0	1	Susceptible
1207	5494	770	ACCase	Avena	TRUE	Timaru	Avena fatua	Fenoxaprop	51.75	9	0	9	0	0	1	Susceptible
1207	5494	770	ALS	Avena	TRUE	Timaru	Avena fatua	Pyroxsulam	30	5	0	5	0	0	1	Susceptible
1207	5494	771	ACCase	Avena	TRUE	Timaru	Avena fatua	Fenoxaprop	51.75	9	0	9	0	0	1	Susceptible
1207	5494	772	ACCase	Avena	TRUE	Timaru	Avena fatua	Fenoxaprop	51.75	6	0	6	0	0	1	Susceptible
1207	5494	773	ACCase	Avena	TRUE	Timaru	Avena fatua	Fenoxaprop	51.75	9	0	9	0	0	1	Susceptible
1207	5494	775	ACCase	Avena	TRUE	Timaru	Avena fatua	Fenoxaprop	51.75	13	0	13	0	0	1	Susceptible
1207	5494	775	ALS	Avena	TRUE	Timaru	Avena fatua	Pyroxsulam	15	8	2	6	25	0	1	Susceptible
1207	5494	776	ACCase	Avena	TRUE	Timaru	Avena fatua	Fenoxaprop	51.75	8	0	8	0	0	1	Susceptible
1207	5494	777	ACCase	Avena	TRUE	Timaru	Avena fatua	Fenoxaprop	51.75	11	0	11	0	0	1	Susceptible
1218	5593	659	ACCase	Bromus	TRUE	Timaru	Bromus hordeaceus	Clethodim	240	20	0	20	0	0	1	Susceptible
1218	5593	659	ACCase	Bromus	TRUE	Timaru	Bromus hordeaceus	Haloxyfop	250	17	0	17	0	0	1	Susceptible
1218	5593	659	ALS	Bromus	TRUE	Timaru	Bromus hordeaceus	Pyroxsulam	15	19	0	19	0	0	1	Susceptible
1218	5593	659	EPSPS	Bromus	TRUE	Timaru	Bromus hordeaceus	Glyphosate	540	19	0	19	0	0	1	Susceptible
1218	5593	660	ACCase	Bromus	TRUE	Timaru	Bromus hordeaceus	Clethodim	240	20	0	20	0	0	1	Susceptible
1218	5593	660	ACCase	Bromus	TRUE	Timaru	Bromus hordeaceus	Haloxyfop	250	19	0	19	0	0	1	Susceptible
1218	5593	660	ALS	Bromus	TRUE	Timaru	Bromus hordeaceus	Pyroxsulam	15	19	0	19	0	0	1	Susceptible
1218	5593	660	EPSPS	Bromus	TRUE	Timaru	Bromus hordeaceus	Glyphosate	540	20	0	20	0	0	1	Susceptible
1218	5593	661	ACCase	Bromus	TRUE	Timaru	Bromus hordeaceus	Clethodim	240	17	0	17	0	0	1	Susceptible
1218	5593	661	ACCase	Bromus	TRUE	Timaru	Bromus hordeaceus	Haloxyfop	250	18	0	18	0	0	1	Susceptible
1218	5593	661	ALS	Bromus	TRUE	Timaru	Bromus hordeaceus	Pyroxsulam	15	19	0	19	0	0	1	Susceptible
1218	5593	661	EPSPS	Bromus	TRUE	Timaru	Bromus hordeaceus	Glyphosate	540	17	0	17	0	0	1	Susceptible
1218	5593	662	ACCase	Bromus	TRUE	Timaru	Bromus hordeaceus	Clethodim	240	19	0	19	0	0	1	Susceptible
1218	5593	662	ACCase	Bromus	TRUE	Timaru	Bromus hordeaceus	Haloxyfop	250	17	0	17	0	0	1	Susceptible
1218	5593	662	ALS	Bromus	TRUE	Timaru	Bromus hordeaceus	Pyroxsulam	15	17	0	17	0	0	1	Susceptible
1218	5593	662	EPSPS	Bromus	TRUE	Timaru	Bromus hordeaceus	Glyphosate	540	18	0	18	0	0	1	Susceptible
1218	5593	663	ACCase	Bromus	TRUE	Timaru	Bromus hordeaceus	Clethodim	240	17	0	17	0	0	1	Susceptible
1218	5593	663	ACCase	Bromus	TRUE	Timaru	Bromus hordeaceus	Haloxyfop	250	18	0	18	0	0	1	Susceptible
1218	5593	663	ALS	Bromus	TRUE	Timaru	Bromus hordeaceus	Pyroxsulam	15	18	0	18	0	0	1	Susceptible
1218	5593	663	EPSPS	Bromus	TRUE	Timaru	Bromus hordeaceus	Glyphosate	540	19	0	19	0	0	1	Susceptible
1218	5593	664	ACCase	Bromus	TRUE	Timaru	Bromus hordeaceus	Clethodim	240	17	0	17	0	0	1	Susceptible
1218	5593	664	ACCase	Bromus	TRUE	Timaru	Bromus hordeaceus	Haloxyfop	250	18	0	18	0	0	1	Susceptible
1218	5593	664	ALS	Bromus	TRUE	Timaru	Bromus hordeaceus	Pyroxsulam	15	18	0	18	0	0	1	Susceptible
1218	5593	664	EPSPS	Bromus	TRUE	Timaru	Bromus hordeaceus	Glyphosate	540	19	0	19	0	0	1	Susceptible
1218	5593	665	ACCase	Bromus	TRUE	Timaru	Bromus hordeaceus	Clethodim	240	19	0	19	0	0	1	Susceptible
1218	5593	665	ACCase	Bromus	TRUE	Timaru	Bromus hordeaceus	Haloxyfop	250	20	0	20	0	0	1	Susceptible
1218	5593	665	ALS	Bromus	TRUE	Timaru	Bromus hordeaceus	Pyroxsulam	15	37	0	37	0	0	1	Susceptible
1218	5593	665	EPSPS	Bromus	TRUE	Timaru	Bromus hordeaceus	Glyphosate	540	19	0	19	0	0	1	Susceptible
1218	5593	866	ACCase	Lolium	TRUE	Timaru	Lolium perenne	Clethodim	120	17	0	17	0	0	1	Susceptible
1218	5593	866	ACCase	Lolium	TRUE	Timaru	Lolium perenne	Haloxyfop	60	13	0	13	0	0	1	Susceptible
1218	5593	866	ACCase	Lolium	TRUE	Timaru	Lolium perenne	Pinoxaden	30	11	0	11	0	0	1	Susceptible
1218	5593	866	ALS	Lolium	TRUE	Timaru	Lolium perenne	Iodosulfuron	7.5	16	0	16	0	0	1	Susceptible
1218	5593	866	EPSPS	Lolium	TRUE	Timaru	Lolium perenne	Glyphosate	1458	15	0	15	0	0	1	Susceptible
1218	5593	867	ACCase	Lolium	TRUE	Timaru	Lolium perenne	Clethodim	120	16	0	16	0	0	1	Susceptible
1218	5593	867	ACCase	Lolium	TRUE	Timaru	Lolium perenne	Haloxyfop	60	17	0	17	0	0	1	Susceptible
1218	5593	867	ACCase	Lolium	TRUE	Timaru	Lolium perenne	Pinoxaden	30	18	0	18	0	0	1	Susceptible
1218	5593	867	ALS	Lolium	TRUE	Timaru	Lolium perenne	Iodosulfuron	7.5	17	0	17	0	0	1	Susceptible
1218	5593	867	ALS	Lolium	TRUE	Timaru	Lolium perenne	Pyroxsulam	15	11	5	6	45	1	1	Resistant
1218	5593	867	EPSPS	Lolium	TRUE	Timaru	Lolium perenne	Glyphosate	1458	20	0	20	0	0	1	Susceptible
1218	5593	869	EPSPS	Lolium	TRUE	Timaru	Lolium perenne	Glyphosate	1458	5	0	5	0	0	1	Susceptible
1218	5593	871	ACCase	Lolium	TRUE	Timaru	Lolium perenne	Haloxyfop	125	5	0	5	0	0	1	Susceptible
1218	5593	871	ACCase	Lolium	TRUE	Timaru	Lolium perenne	Pinoxaden	30	5	0	5	0	0	1	Susceptible
1218	5593	871	ALS	Lolium	TRUE	Timaru	Lolium perenne	Iodosulfuron	7.5	10	0	10	0	0	1	Susceptible
1218	5593	871	EPSPS	Lolium	TRUE	Timaru	Lolium perenne	Glyphosate	1458	6	0	6	0	0	1	Susceptible
1218	5593	872	ACCase	Lolium	TRUE	Timaru	Lolium perenne	Haloxyfop	125	14	0	14	0	0	1	Susceptible
1218	5593	872	ACCase	Lolium	TRUE	Timaru	Lolium perenne	Pinoxaden	30	12	0	12	0	0	1	Susceptible
1218	5593	872	ALS	Lolium	TRUE	Timaru	Lolium perenne	Iodosulfuron	7.5	13	0	13	0	0	1	Susceptible
1218	5593	872	EPSPS	Lolium	TRUE	Timaru	Lolium perenne	Glyphosate	1458	12	0	12	0	0	1	Susceptible
1495	6928	25	ACCase	Phalaris	TRUE	Lincoln	Phalaris minor	Pinoxaden	30	6	0	6	0	0	1	Susceptible
1495	6928	25	ALS	Phalaris	TRUE	Lincoln	Phalaris minor	Iodosulfuron	7.5	5	0	5	0	0	1	Susceptible
1495	6928	26	ACCase	Bromus	TRUE	Lincoln	Bromus catharticus	Clethodim	120	68	0	68	0	0	1	Susceptible
1495	6928	26	ACCase	Bromus	TRUE	Lincoln	Bromus catharticus	Haloxyfop	60	45	0	45	0	0	1	Susceptible
1495	6928	26	ALS	Bromus	TRUE	Lincoln	Bromus catharticus	Pyroxsulam	15	39	0	39	0	0	1	Susceptible
1495	6928	26	EPSPS	Bromus	TRUE	Lincoln	Bromus catharticus	Glyphosate	1458	72	0	72	0	0	1	Susceptible
1495	6928	27	ACCase	Lolium	TRUE	Lincoln	Lolium perenne	Haloxyfop	60	65	0	65	0	0	1	Susceptible
1495	6928	27	ACCase	Lolium	TRUE	Lincoln	Lolium perenne	Pinoxaden	30	25	0	25	0	0	1	Susceptible
1495	6928	27	ALS	Lolium	TRUE	Lincoln	Lolium perenne	Iodosulfuron	7.5	24	0	24	0	0	1	Susceptible
1495	6928	27	ALS	Lolium	TRUE	Lincoln	Lolium perenne	Pyroxsulam	15	26	6	20	23	1	1	Resistant
1495	6928	27	EPSPS	Lolium	TRUE	Lincoln	Lolium perenne	Glyphosate	1458	61	0	61	0	0	1	Susceptible
1495	6928	28	ACCase	Bromus	TRUE	Lincoln	Bromus catharticus	Clethodim	120	86	0	86	0	0	1	Susceptible
1495	6928	28	ACCase	Bromus	TRUE	Lincoln	Bromus catharticus	Haloxyfop	60	105	0	105	0	0	1	Susceptible
1495	6928	28	ALS	Bromus	TRUE	Lincoln	Bromus catharticus	Pyroxsulam	15	46	0	46	0	0	1	Susceptible
1495	6928	28	EPSPS	Bromus	TRUE	Lincoln	Bromus catharticus	Glyphosate	1458	92	0	92	0	0	1	Susceptible
1495	6928	29	ACCase	Lolium	TRUE	Lincoln	Lolium perenne	Haloxyfop	60	211	29	182	14	1	1	Resistant
1495	6928	29	ACCase	Lolium	TRUE	Lincoln	Lolium perenne	Pinoxaden	30	45	4	41	9	0	1	Susceptible
1495	6928	29	ALS	Lolium	TRUE	Lincoln	Lolium perenne	Iodosulfuron	7.5	50	0	50	0	0	1	Susceptible
1495	6928	29	ALS	Lolium	TRUE	Lincoln	Lolium perenne	Pyroxsulam	15	105	16	89	15	1	1	Resistant
1495	6928	29	EPSPS	Lolium	TRUE	Lincoln	Lolium perenne	Glyphosate	1458	70	0	70	0	0	1	Susceptible
1495	6928	507	ALS	Sonchus	TRUE	Lincoln	Sonchus oleraceus	Chlorsulfuron	15	8	0	8	0	0	1	Susceptible
1495	6928	507	EPSPS	Sonchus	TRUE	Lincoln	Sonchus oleraceus	Glyphosate	1458	10	0	10	0	0	1	Susceptible
1628	7620	23	ACCase	Avena	TRUE	Lincoln	Avena fatua	Haloxyfop	52	8	0	8	0	0	1	Susceptible
1628	7620	23	ACCase	Avena	TRUE	Lincoln	Avena fatua	Pinoxaden	25	11	0	11	0	0	1	Susceptible
1628	7620	24	ACCase	Avena	TRUE	Lincoln	Avena fatua	Clethodim	120	42	0	42	0	0	1	Susceptible
1628	7620	24	ACCase	Avena	TRUE	Lincoln	Avena fatua	Haloxyfop	52	15	0	15	0	0	1	Susceptible
1628	7620	24	ACCase	Avena	TRUE	Lincoln	Avena fatua	Pinoxaden	25	13	0	13	0	0	1	Susceptible
1656	7933	212	ALS	Stellaria	FALSE	Lincoln	Stellaria media	Chlorsulfuron	20	19	18	1	95	1	1	Resistant
1656	7933	212	ALS	Stellaria	FALSE	Lincoln	Stellaria media	Flumetsulam	30	20	20	0	100	1	1	Resistant
1656	7933	212	ALS	Stellaria	FALSE	Lincoln	Stellaria media	Imazethapyr	96	7	7	0	100	1	1	Resistant
1666	8000	22	ACCase	Avena	TRUE	Lincoln	Avena fatua	Clethodim	120	47	0	47	0	0	1	Susceptible
1666	8000	22	ACCase	Avena	TRUE	Lincoln	Avena fatua	Fenoxaprop	51.75	61	0	61	0	0	1	Susceptible
1666	8000	22	ACCase	Avena	TRUE	Lincoln	Avena fatua	Haloxyfop	60	17	0	17	0	0	1	Susceptible
1666	8000	22	ACCase	Avena	TRUE	Lincoln	Avena fatua	Pinoxaden	25	11	0	11	0	0	1	Susceptible
1666	8000	22	EPSPS	Avena	TRUE	Lincoln	Avena fatua	Glyphosate	1458	6	0	6	0	0	1	Susceptible
1705	8213	17	ACCase	Avena	TRUE	Lincoln	Avena fatua	Clethodim	120	47	0	47	0	0	1	Susceptible
1705	8213	17	ACCase	Avena	TRUE	Lincoln	Avena fatua	Fenoxaprop	51.75	46	0	46	0	0	1	Susceptible
1705	8213	17	ACCase	Avena	TRUE	Lincoln	Avena fatua	Haloxyfop	52	17	0	17	0	0	1	Susceptible
1705	8213	17	ACCase	Avena	TRUE	Lincoln	Avena fatua	Pinoxaden	25	17	0	17	0	0	1	Susceptible
1705	8213	18	ACCase	Lolium	TRUE	Lincoln	Lolium multiflorum	Clethodim	120	23	0	23	0	0	1	Susceptible
1705	8213	18	ACCase	Lolium	TRUE	Lincoln	Lolium multiflorum	Haloxyfop	60	83	22	61	27	1	1	Resistant
1705	8213	18	ACCase	Lolium	TRUE	Lincoln	Lolium multiflorum	Pinoxaden	30	27	0	27	0	0	1	Susceptible
1705	8213	18	ALS	Lolium	TRUE	Lincoln	Lolium multiflorum	Iodosulfuron	7.5	26	0	26	0	0	1	Susceptible
1705	8213	18	ALS	Lolium	TRUE	Lincoln	Lolium multiflorum	Pyroxsulam	15	21	0	21	0	0	1	Susceptible
1705	8213	18	EPSPS	Lolium	TRUE	Lincoln	Lolium multiflorum	Glyphosate	1458	27	0	27	0	0	1	Susceptible
1705	8213	19	ACCase	Phalaris	TRUE	Lincoln	Phalaris spp.	Haloxyfop	60	12	0	12	0	0	1	Susceptible
1705	8213	19	ACCase	Phalaris	TRUE	Lincoln	Phalaris spp.	Pinoxaden	30	14	0	14	0	0	1	Susceptible
1705	8213	19	ALS	Phalaris	TRUE	Lincoln	Phalaris spp.	Clodinafop	24	6	0	6	0	0	1	Susceptible
1705	8213	19	ALS	Phalaris	TRUE	Lincoln	Phalaris spp.	Iodosulfuron	7.5	14	0	14	0	0	1	Susceptible
1705	8213	19	EPSPS	Phalaris	TRUE	Lincoln	Phalaris spp.	Glyphosate	1458	7	0	7	0	0	1	Susceptible
1705	8213	20	ACCase	Lolium	TRUE	Lincoln	Lolium perenne	Haloxyfop	60	36	0	36	0	0	1	Susceptible
1705	8213	20	ALS	Lolium	TRUE	Lincoln	Lolium perenne	Iodosulfuron	7.5	15	0	15	0	0	1	Susceptible
1705	8213	20	ALS	Lolium	TRUE	Lincoln	Lolium perenne	Pyroxsulam	15	21	0	21	0	0	1	Susceptible
1705	8213	20	EPSPS	Lolium	TRUE	Lincoln	Lolium perenne	Glyphosate	1458	67	0	67	0	0	1	Susceptible
1705	8213	21	ACCase	Avena	TRUE	Lincoln	Avena fatua	Clethodim	120	48	0	48	0	0	1	Susceptible
1705	8213	21	ACCase	Avena	TRUE	Lincoln	Avena fatua	Fenoxaprop	51.75	43	0	43	0	0	1	Susceptible
1705	8213	21	ACCase	Avena	TRUE	Lincoln	Avena fatua	Haloxyfop	52	19	0	19	0	0	1	Susceptible
1705	8213	21	ACCase	Avena	TRUE	Lincoln	Avena fatua	Pinoxaden	25	15	0	15	0	0	1	Susceptible
1705	8213	1831	ACCase	Phalaris	TRUE	Lincoln	Phalaris minor	Clethodim	240	7	0	7	0	0	1	Susceptible
1705	8213	1831	ACCase	Phalaris	TRUE	Lincoln	Phalaris minor	Fenoxaprop	51.75	9	0	9	0	0	1	Susceptible
1705	8213	1831	ACCase	Phalaris	TRUE	Lincoln	Phalaris minor	Haloxyfop	60	7	0	7	0	0	1	Susceptible
1705	8213	1831	ACCase	Phalaris	TRUE	Lincoln	Phalaris minor	Pinoxaden	30	7	0	7	0	0	1	Susceptible
1705	8213	1831	ALS	Phalaris	TRUE	Lincoln	Phalaris minor	Clodinafop	24	5	0	5	0	0	1	Susceptible
1705	8213	1831	ALS	Phalaris	TRUE	Lincoln	Phalaris minor	Clodinafop	72	9	0	9	0	0	1	Susceptible
1705	8213	1847	ACCase	Phalaris	TRUE	Lincoln	Phalaris minor	Pinoxaden	30	9	0	9	0	0	1	Susceptible
1705	8213	1847	ACCase	Phalaris	TRUE	Lincoln	Phalaris minor	Pinoxaden	90	8	0	8	0	0	1	Susceptible
1705	8213	1847	ALS	Phalaris	TRUE	Lincoln	Phalaris minor	Clodinafop	24	9	0	9	0	0	1	Susceptible
1815	8907	1194	ACCase	Lolium	TRUE	Timaru	Lolium perenne	Haloxyfop	60	11	11	0	100	1	1	Resistant
1815	8907	1194	ACCase	Lolium	TRUE	Timaru	Lolium perenne	Pinoxaden	30	11	10	1	91	1	1	Resistant
1815	8907	1194	ALS	Lolium	TRUE	Timaru	Lolium perenne	Pyroxsulam	15	7	7	0	100	1	1	Resistant
1815	8907	1195	ACCase	Lolium	TRUE	Timaru	Lolium hybridum	Haloxyfop	60	15	14	1	93	1	1	Resistant
1815	8907	1195	ACCase	Lolium	TRUE	Timaru	Lolium hybridum	Pinoxaden	30	14	11	3	79	1	1	Resistant
1815	8907	1195	ALS	Lolium	TRUE	Timaru	Lolium hybridum	Iodosulfuron	7.5	16	16	0	100	1	1	Resistant
1815	8907	1195	EPSPS	Lolium	TRUE	Timaru	Lolium hybridum	Glyphosate	1458	16	0	16	0	0	1	Susceptible
1815	8907	1196	ACCase	Lolium	TRUE	Timaru	Lolium hybridum	Haloxyfop	125	6	4	2	67	1	1	Resistant
1815	8907	1196	ACCase	Lolium	TRUE	Timaru	Lolium hybridum	Pinoxaden	30	10	8	2	80	1	1	Resistant
1815	8907	1196	ALS	Lolium	TRUE	Timaru	Lolium hybridum	Iodosulfuron	7.5	7	5	2	71	1	1	Resistant
1815	8907	1196	EPSPS	Lolium	TRUE	Timaru	Lolium hybridum	Glyphosate	1458	10	0	10	0	0	1	Susceptible
1815	8907	1197	ACCase	Lolium	TRUE	Timaru	Lolium multiflorum	Haloxyfop	125	17	14	3	82	1	1	Resistant
1815	8907	1197	ACCase	Lolium	TRUE	Timaru	Lolium multiflorum	Pinoxaden	30	14	13	1	93	1	1	Resistant
1815	8907	1197	ALS	Lolium	TRUE	Timaru	Lolium multiflorum	Iodosulfuron	7.5	16	16	0	100	1	1	Resistant
1815	8907	1197	EPSPS	Lolium	TRUE	Timaru	Lolium multiflorum	Glyphosate	1458	16	0	16	0	0	1	Susceptible
1815	8907	1198	ACCase	Lolium	TRUE	Timaru	Lolium multiflorum	Haloxyfop	60	11	11	0	100	1	1	Resistant
1815	8907	1198	ACCase	Lolium	TRUE	Timaru	Lolium multiflorum	Pinoxaden	30	10	10	0	100	1	1	Resistant
1815	8907	1198	ALS	Lolium	TRUE	Timaru	Lolium multiflorum	Iodosulfuron	7.5	8	8	0	100	1	1	Resistant
1815	8907	1199	ACCase	Lolium	TRUE	Timaru	Lolium multiflorum	Clethodim	120	10	10	0	100	1	1	Resistant
1815	8907	1199	ACCase	Lolium	TRUE	Timaru	Lolium multiflorum	Haloxyfop	125	5	5	0	100	1	1	Resistant
1815	8907	1199	ACCase	Lolium	TRUE	Timaru	Lolium multiflorum	Pinoxaden	30	8	8	0	100	1	1	Resistant
1815	8907	1199	ALS	Lolium	TRUE	Timaru	Lolium multiflorum	Iodosulfuron	7.5	8	8	0	100	1	1	Resistant
1815	8907	1199	EPSPS	Lolium	TRUE	Timaru	Lolium multiflorum	Glyphosate	1458	8	0	8	0	0	1	Susceptible
1815	8907	1200	ACCase	Lolium	TRUE	Timaru	Lolium multiflorum	Haloxyfop	125	9	8	1	89	1	1	Resistant
1815	8907	1200	ACCase	Lolium	TRUE	Timaru	Lolium multiflorum	Pinoxaden	30	9	9	0	100	1	1	Resistant
1815	8907	1200	ALS	Lolium	TRUE	Timaru	Lolium multiflorum	Iodosulfuron	7.5	5	5	0	100	1	1	Resistant
1815	8907	1200	EPSPS	Lolium	TRUE	Timaru	Lolium multiflorum	Glyphosate	1458	7	0	7	0	0	1	Susceptible
1815	8907	1201	ACCase	Lolium	TRUE	Timaru	Lolium multiflorum	Haloxyfop	125	9	5	4	56	1	1	Resistant
1815	8907	1201	EPSPS	Lolium	TRUE	Timaru	Lolium multiflorum	Glyphosate	1458	6	0	6	0	0	1	Susceptible
1815	8907	1202	ACCase	Lolium	TRUE	Timaru	Lolium multiflorum	Clethodim	120	16	16	0	100	1	1	Resistant
1815	8907	1202	EPSPS	Lolium	TRUE	Timaru	Lolium multiflorum	Glyphosate	1458	6	0	6	0	0	1	Susceptible
1815	8907	1204	ACCase	Lolium	TRUE	Timaru	Lolium perenne	Clethodim	120	32	18	14	56	1	1	Resistant
1815	8907	1204	ACCase	Lolium	TRUE	Timaru	Lolium perenne	Haloxyfop	60	16	16	0	100	1	1	Resistant
1815	8907	1204	ALS	Lolium	TRUE	Timaru	Lolium perenne	Iodosulfuron	7.5	17	17	0	100	1	1	Resistant
1815	8907	1204	ALS	Lolium	TRUE	Timaru	Lolium perenne	Pyroxsulam	15	14	14	0	100	1	1	Resistant
1815	8907	1204	EPSPS	Lolium	TRUE	Timaru	Lolium perenne	Glyphosate	1458	17	0	17	0	0	1	Susceptible
1815	8907	1205	ACCase	Lolium	TRUE	Timaru	Lolium hybridum	Haloxyfop	125	16	12	4	75	1	1	Resistant
1815	8907	1205	ACCase	Lolium	TRUE	Timaru	Lolium hybridum	Pinoxaden	30	17	17	0	100	1	1	Resistant
1815	8907	1205	ALS	Lolium	TRUE	Timaru	Lolium hybridum	Iodosulfuron	7.5	12	12	0	100	1	1	Resistant
1815	8907	1205	EPSPS	Lolium	TRUE	Timaru	Lolium hybridum	Glyphosate	1458	11	0	11	0	0	1	Susceptible
1815	8907	1206	ACCase	Lolium	TRUE	Timaru	Lolium hybridum	Haloxyfop	125	15	15	0	100	1	1	Resistant
1815	8907	1206	ACCase	Lolium	TRUE	Timaru	Lolium hybridum	Pinoxaden	30	15	11	4	73	1	1	Resistant
1815	8907	1206	ALS	Lolium	TRUE	Timaru	Lolium hybridum	Iodosulfuron	7.5	14	14	0	100	1	1	Resistant
1815	8907	1206	EPSPS	Lolium	TRUE	Timaru	Lolium hybridum	Glyphosate	1458	13	0	13	0	0	1	Susceptible
1815	8907	1207	ACCase	Lolium	TRUE	Timaru	Lolium hybridum	Haloxyfop	125	9	6	3	67	1	1	Resistant
1815	8907	1207	ACCase	Lolium	TRUE	Timaru	Lolium hybridum	Pinoxaden	30	14	14	0	100	1	1	Resistant
1815	8907	1207	ALS	Lolium	TRUE	Timaru	Lolium hybridum	Iodosulfuron	7.5	15	15	0	100	1	1	Resistant
1815	8907	1207	EPSPS	Lolium	TRUE	Timaru	Lolium hybridum	Glyphosate	1458	11	0	11	0	0	1	Susceptible
1815	8907	1208	ACCase	Lolium	TRUE	Timaru	Lolium hybridum	Clethodim	120	16	16	0	100	1	1	Resistant
1815	8907	1208	ACCase	Lolium	TRUE	Timaru	Lolium hybridum	Haloxyfop	60	12	12	0	100	1	1	Resistant
1815	8907	1208	ACCase	Lolium	TRUE	Timaru	Lolium hybridum	Pinoxaden	30	28	22	6	79	1	1	Resistant
1815	8907	1208	ALS	Lolium	TRUE	Timaru	Lolium hybridum	Iodosulfuron	7.5	18	17	1	94	1	1	Resistant
1815	8907	1208	EPSPS	Lolium	TRUE	Timaru	Lolium hybridum	Glyphosate	1458	16	0	16	0	0	1	Susceptible
1815	8907	1209	ACCase	Lolium	TRUE	Timaru	Lolium multiflorum	Haloxyfop	125	11	8	3	73	1	1	Resistant
1815	8907	1209	ACCase	Lolium	TRUE	Timaru	Lolium multiflorum	Pinoxaden	30	10	8	2	80	1	1	Resistant
1815	8907	1209	ALS	Lolium	TRUE	Timaru	Lolium multiflorum	Iodosulfuron	7.5	11	11	0	100	1	1	Resistant
1815	8907	1209	EPSPS	Lolium	TRUE	Timaru	Lolium multiflorum	Glyphosate	1458	10	0	10	0	0	1	Susceptible
1815	8907	1210	ACCase	Lolium	TRUE	Timaru	Lolium multiflorum	Haloxyfop	125	13	12	1	92	1	1	Resistant
1815	8907	1210	ACCase	Lolium	TRUE	Timaru	Lolium multiflorum	Pinoxaden	30	10	6	4	60	1	1	Resistant
1815	8907	1210	ALS	Lolium	TRUE	Timaru	Lolium multiflorum	Iodosulfuron	7.5	15	15	0	100	1	1	Resistant
1815	8907	1210	EPSPS	Lolium	TRUE	Timaru	Lolium multiflorum	Glyphosate	1458	15	0	15	0	0	1	Susceptible
1815	8907	1211	ACCase	Lolium	TRUE	Timaru	Lolium multiflorum	Haloxyfop	125	12	12	0	100	1	1	Resistant
1815	8907	1211	ACCase	Lolium	TRUE	Timaru	Lolium multiflorum	Pinoxaden	30	10	10	0	100	1	1	Resistant
1815	8907	1211	ALS	Lolium	TRUE	Timaru	Lolium multiflorum	Iodosulfuron	7.5	10	10	0	100	1	1	Resistant
1815	8907	1211	EPSPS	Lolium	TRUE	Timaru	Lolium multiflorum	Glyphosate	1458	8	0	8	0	0	1	Susceptible
1815	8907	1212	ACCase	Lolium	TRUE	Timaru	Lolium multiflorum	Clethodim	120	27	16	11	59	1	1	Resistant
1815	8907	1212	ACCase	Lolium	TRUE	Timaru	Lolium multiflorum	Haloxyfop	60	5	5	0	100	1	1	Resistant
1815	8907	1212	ACCase	Lolium	TRUE	Timaru	Lolium multiflorum	Pinoxaden	30	10	9	1	90	1	1	Resistant
1815	8907	1212	ALS	Lolium	TRUE	Timaru	Lolium multiflorum	Iodosulfuron	7.5	8	4	4	50	1	1	Resistant
1815	8907	1212	ALS	Lolium	TRUE	Timaru	Lolium multiflorum	Pyroxsulam	15	12	12	0	100	1	1	Resistant
1815	8907	1212	EPSPS	Lolium	TRUE	Timaru	Lolium multiflorum	Glyphosate	1458	8	0	8	0	0	1	Susceptible
1815	8907	1213	ACCase	Lolium	TRUE	Timaru	Lolium multiflorum	Haloxyfop	125	10	4	6	40	1	1	Resistant
1815	8907	1213	ACCase	Lolium	TRUE	Timaru	Lolium multiflorum	Pinoxaden	30	5	1	4	20	0	1	Susceptible
1815	8907	1213	EPSPS	Lolium	TRUE	Timaru	Lolium multiflorum	Glyphosate	1458	8	0	8	0	0	1	Susceptible
1815	8907	1214	ACCase	Lolium	TRUE	Timaru	Lolium multiflorum	Haloxyfop	125	15	14	1	93	1	1	Resistant
1815	8907	1214	ACCase	Lolium	TRUE	Timaru	Lolium multiflorum	Pinoxaden	30	13	13	0	100	1	1	Resistant
1815	8907	1214	ALS	Lolium	TRUE	Timaru	Lolium multiflorum	Iodosulfuron	7.5	17	17	0	100	1	1	Resistant
1815	8907	1214	EPSPS	Lolium	TRUE	Timaru	Lolium multiflorum	Glyphosate	1458	12	0	12	0	0	1	Susceptible
1815	8907	1215	ACCase	Lolium	TRUE	Timaru	Lolium multiflorum	Haloxyfop	125	12	10	2	83	1	1	Resistant
1815	8907	1215	ACCase	Lolium	TRUE	Timaru	Lolium multiflorum	Pinoxaden	30	10	9	1	90	1	1	Resistant
1815	8907	1215	ALS	Lolium	TRUE	Timaru	Lolium multiflorum	Iodosulfuron	7.5	9	9	0	100	1	1	Resistant
1815	8907	1215	EPSPS	Lolium	TRUE	Timaru	Lolium multiflorum	Glyphosate	1458	9	0	9	0	0	1	Susceptible
1815	8907	1216	ACCase	Lolium	TRUE	Timaru	Lolium multiflorum	Haloxyfop	125	17	13	4	76	1	1	Resistant
1815	8907	1216	ACCase	Lolium	TRUE	Timaru	Lolium multiflorum	Pinoxaden	30	16	7	9	44	1	1	Resistant
1815	8907	1216	ALS	Lolium	TRUE	Timaru	Lolium multiflorum	Iodosulfuron	7.5	14	14	0	100	1	1	Resistant
1815	8907	1216	EPSPS	Lolium	TRUE	Timaru	Lolium multiflorum	Glyphosate	1458	17	0	17	0	0	1	Susceptible
1899	9455	183	ACCase	Avena	TRUE	Lincoln	Avena fatua	Clethodim	120	43	0	43	0	0	1	Susceptible
1899	9455	183	ACCase	Avena	TRUE	Lincoln	Avena fatua	Fenoxaprop	51.75	49	45	4	92	1	1	Resistant
1899	9455	183	ACCase	Avena	TRUE	Lincoln	Avena fatua	Haloxyfop	52	10	0	10	0	0	1	Susceptible
1899	9455	183	ACCase	Avena	TRUE	Lincoln	Avena fatua	Pinoxaden	25	11	0	11	0	0	1	Susceptible
1899	9455	184	ACCase	Avena	TRUE	Lincoln	Avena fatua	Clethodim	120	45	0	45	0	0	1	Susceptible
1899	9455	184	ACCase	Avena	TRUE	Lincoln	Avena fatua	Fenoxaprop	51.75	46	0	46	0	0	1	Susceptible
1899	9455	184	ACCase	Avena	TRUE	Lincoln	Avena fatua	Haloxyfop	52	12	0	12	0	0	1	Susceptible
1899	9455	184	ACCase	Avena	TRUE	Lincoln	Avena fatua	Pinoxaden	25	13	0	13	0	0	1	Susceptible
1910	9553	2210	ACCase	Lolium	FALSE	Timaru	Lolium multiflorum	Clethodim	120	17	0	17	0	0	1	Susceptible
1910	9553	2210	ACCase	Lolium	FALSE	Timaru	Lolium multiflorum	Haloxyfop	125	17	0	17	0	0	1	Susceptible
1910	9553	2210	ACCase	Lolium	FALSE	Timaru	Lolium multiflorum	Pinoxaden	30	15	0	15	0	0	1	Susceptible
1910	9553	2210	ALS	Lolium	FALSE	Timaru	Lolium multiflorum	Iodosulfuron	7.5	16	16	0	100	1	1	Resistant
1910	9553	2210	ALS	Lolium	FALSE	Timaru	Lolium multiflorum	Pyroxsulam	15	15	15	0	100	1	1	Resistant
1910	9553	2210	EPSPS	Lolium	FALSE	Timaru	Lolium multiflorum	Glyphosate	1458	10	0	10	0	0	1	Susceptible
2114	10064	14	ACCase	Lolium	TRUE	Lincoln	Lolium perenne	Haloxyfop	60	32	18	14	56	1	1	Resistant
2114	10064	14	ACCase	Lolium	TRUE	Lincoln	Lolium perenne	Pinoxaden	30	9	0	9	0	0	1	Susceptible
2114	10064	14	ALS	Lolium	TRUE	Lincoln	Lolium perenne	Iodosulfuron	7.5	13	0	13	0	0	1	Susceptible
2114	10064	14	ALS	Lolium	TRUE	Lincoln	Lolium perenne	Pyroxsulam	15	8	3	5	38	0	1	Susceptible
2114	10064	14	EPSPS	Lolium	TRUE	Lincoln	Lolium perenne	Glyphosate	1458	5	0	5	0	0	1	Susceptible
2199	10430	12	ACCase	Lolium	TRUE	Lincoln	Lolium perenne	Clethodim	120	5	0	5	0	0	1	Susceptible
2199	10430	12	ACCase	Lolium	TRUE	Lincoln	Lolium perenne	Haloxyfop	60	9	0	9	0	0	1	Susceptible
2199	10430	12	ALS	Lolium	TRUE	Lincoln	Lolium perenne	Iodosulfuron	7.5	13	0	13	0	0	1	Susceptible
2199	10430	12	EPSPS	Lolium	TRUE	Lincoln	Lolium perenne	Glyphosate	1458	8	0	8	0	0	1	Susceptible
2199	10430	13	ACCase	Lolium	TRUE	Lincoln	Lolium perenne	Fenoxaprop	51.75	10	0	10	0	0	1	Susceptible
2199	10430	13	ACCase	Lolium	TRUE	Lincoln	Lolium perenne	Haloxyfop	60	22	0	22	0	0	1	Susceptible
2199	10430	13	ACCase	Lolium	TRUE	Lincoln	Lolium perenne	Pinoxaden	30	13	0	13	0	0	1	Susceptible
2199	10430	13	ALS	Lolium	TRUE	Lincoln	Lolium perenne	Iodosulfuron	7.5	10	0	10	0	0	1	Susceptible
2199	10430	13	ALS	Lolium	TRUE	Lincoln	Lolium perenne	Pyroxsulam	15	18	0	18	0	0	1	Susceptible
2199	10430	13	EPSPS	Lolium	TRUE	Lincoln	Lolium perenne	Glyphosate	1458	7	0	7	0	0	1	Susceptible
2199	10430	168	ACCase	Bromus	TRUE	Lincoln	Bromus catharticus	Clethodim	120	70	0	70	0	0	1	Susceptible
2199	10430	168	ACCase	Bromus	TRUE	Lincoln	Bromus catharticus	Haloxyfop	60	82	0	82	0	0	1	Susceptible
2199	10430	168	ALS	Bromus	TRUE	Lincoln	Bromus catharticus	Pyroxsulam	15	43	0	43	0	0	1	Susceptible
2199	10430	168	EPSPS	Bromus	TRUE	Lincoln	Bromus catharticus	Glyphosate	1458	77	0	77	0	0	1	Susceptible
2240	10866	281	ACCase	Lolium	FALSE	Timaru	Lolium multiflorum	Haloxyfop	125	11	0	11	0	0	1	Susceptible
2240	10866	281	ACCase	Lolium	FALSE	Timaru	Lolium multiflorum	Pinoxaden	30	8	0	8	0	0	1	Susceptible
2240	10866	281	ALS	Lolium	FALSE	Timaru	Lolium multiflorum	Pyroxsulam	15	10	0	10	0	0	1	Susceptible
2240	10866	282	ACCase	Lolium	FALSE	Timaru	Lolium multiflorum	Haloxyfop	125	6	0	6	0	0	1	Susceptible
2240	10866	282	ACCase	Lolium	FALSE	Timaru	Lolium multiflorum	Pinoxaden	30	6	0	6	0	0	1	Susceptible
2240	10866	282	ALS	Lolium	FALSE	Timaru	Lolium multiflorum	Pyroxsulam	15	7	0	7	0	0	1	Susceptible
2240	10866	285	ACCase	Lolium	FALSE	Timaru	Lolium multiflorum	Haloxyfop	125	6	0	6	0	0	1	Susceptible
2240	10866	285	ACCase	Lolium	FALSE	Timaru	Lolium multiflorum	Pinoxaden	30	6	0	6	0	0	1	Susceptible
2240	10866	286	ACCase	Lolium	FALSE	Timaru	Lolium multiflorum	Haloxyfop	125	5	0	5	0	0	1	Susceptible
2240	10866	286	ACCase	Lolium	FALSE	Timaru	Lolium multiflorum	Pinoxaden	30	5	0	5	0	0	1	Susceptible
2240	10866	286	ALS	Lolium	FALSE	Timaru	Lolium multiflorum	Pyroxsulam	NA	6	0	6	0	0	1	Susceptible
2240	10866	287	ACCase	Lolium	FALSE	Timaru	Lolium multiflorum	Haloxyfop	125	5	0	5	0	0	1	Susceptible
2240	10866	287	ACCase	Lolium	FALSE	Timaru	Lolium multiflorum	Pinoxaden	30	5	0	5	0	0	1	Susceptible
2240	10866	287	ALS	Lolium	FALSE	Timaru	Lolium multiflorum	Pyroxsulam	NA	5	0	5	0	0	1	Susceptible
2240	10866	288	ACCase	Lolium	FALSE	Timaru	Lolium multiflorum	Haloxyfop	125	16	0	16	0	0	1	Susceptible
2240	10866	288	ACCase	Lolium	FALSE	Timaru	Lolium multiflorum	Pinoxaden	30	14	0	14	0	0	1	Susceptible
2240	10866	288	ALS	Lolium	FALSE	Timaru	Lolium multiflorum	Pyroxsulam	15	20	0	20	0	0	1	Susceptible
2256	10928	9	ACCase	Bromus	TRUE	Lincoln	Bromus catharticus	Clethodim	120	59	0	59	0	0	1	Susceptible
2256	10928	9	ACCase	Bromus	TRUE	Lincoln	Bromus catharticus	Haloxyfop	60	66	0	66	0	0	1	Susceptible
2256	10928	9	ALS	Bromus	TRUE	Lincoln	Bromus catharticus	Pyroxsulam	15	41	0	41	0	0	1	Susceptible
2256	10928	9	EPSPS	Bromus	TRUE	Lincoln	Bromus catharticus	Glyphosate	1458	60	0	60	0	0	1	Susceptible
2256	10928	10	ACCase	Vulpia	TRUE	Lincoln	Vulpia bromoides	Clethodim	120	56	0	56	0	0	1	Susceptible
2256	10928	10	EPSPS	Vulpia	TRUE	Lincoln	Vulpia bromoides	Glyphosate	1458	132	0	132	0	0	1	Susceptible
2256	10928	1817	EPSPS	Vulpia	TRUE	Lincoln	Vulpia bromoides	Glyphosate	1458	6	0	6	0	0	1	Susceptible
2278	951	151	ACCase	Lolium	FALSE	Lincoln	Lolium perenne	Haloxyfop	60	99	56	43	57	1	1	Resistant
2278	951	151	ALS	Lolium	FALSE	Lincoln	Lolium perenne	Iodosulfuron	7.5	17	3	14	18	0	1	Susceptible
2278	951	151	ALS	Lolium	FALSE	Lincoln	Lolium perenne	Pyroxsulam	15	67	61	6	91	1	1	Resistant
2278	951	151	EPSPS	Lolium	FALSE	Lincoln	Lolium perenne	Glyphosate	1458	17	0	17	0	0	1	Susceptible
2278	951	151	EPSPS	Lolium	FALSE	Lincoln	Lolium perenne	Glyphosate	1498	105	0	105	0	0	1	Susceptible
2278	951	152	ACCase	Lolium	FALSE	Lincoln	Lolium perenne	Haloxyfop	60	113	66	47	58	1	1	Resistant
2278	951	152	ALS	Lolium	FALSE	Lincoln	Lolium perenne	Iodosulfuron	7.5	28	7	21	25	1	1	Resistant
2278	951	152	ALS	Lolium	FALSE	Lincoln	Lolium perenne	Pyroxsulam	15	75	59	16	79	1	1	Resistant
2278	951	152	EPSPS	Lolium	FALSE	Lincoln	Lolium perenne	Glyphosate	1458	14	0	14	0	0	1	Susceptible
2278	951	152	EPSPS	Lolium	FALSE	Lincoln	Lolium perenne	Glyphosate	1498	55	0	55	0	0	1	Susceptible
2278	951	1266	ACCase	Lolium	FALSE	Lincoln	Lolium multiflorum	Haloxyfop	60	9	7	2	78	1	1	Resistant
2278	951	1274	ACCase	Lolium	FALSE	Lincoln	Lolium multiflorum	Haloxyfop	60	20	19	1	95	1	1	Resistant
2289	NA	290	ACCase	Lolium	FALSE	Lincoln	Lolium perenne	Haloxyfop	125	19	19	0	100	1	1	Resistant
2289	NA	290	ACCase	Lolium	FALSE	Lincoln	Lolium perenne	Pinoxaden	30	20	20	0	100	1	1	Resistant
2289	NA	290	ALS	Lolium	FALSE	Lincoln	Lolium perenne	Pyroxsulam	15	20	20	0	100	1	1	Resistant
2289	NA	291	ACCase	Lolium	FALSE	Lincoln	Lolium perenne	Haloxyfop	125	18	18	0	100	1	1	Resistant
2289	NA	291	ACCase	Lolium	FALSE	Lincoln	Lolium perenne	Pinoxaden	30	16	16	0	100	1	1	Resistant
2289	NA	291	ALS	Lolium	FALSE	Lincoln	Lolium perenne	Pyroxsulam	15	15	15	0	100	1	1	Resistant
2289	NA	292	ACCase	Lolium	FALSE	Lincoln	Lolium perenne	Haloxyfop	125	13	13	0	100	1	1	Resistant
2289	NA	292	ACCase	Lolium	FALSE	Lincoln	Lolium perenne	Pinoxaden	30	11	11	0	100	1	1	Resistant
2289	NA	292	ALS	Lolium	FALSE	Lincoln	Lolium perenne	Pyroxsulam	15	9	9	0	100	1	1	Resistant
2289	NA	293	ACCase	Lolium	FALSE	Lincoln	Lolium perenne	Haloxyfop	125	20	20	0	100	1	1	Resistant
2289	NA	293	ACCase	Lolium	FALSE	Lincoln	Lolium perenne	Pinoxaden	30	17	17	0	100	1	1	Resistant
2289	NA	293	ALS	Lolium	FALSE	Lincoln	Lolium perenne	Pyroxsulam	15	16	16	0	100	1	1	Resistant
2289	NA	294	ACCase	Lolium	FALSE	Lincoln	Lolium perenne	Haloxyfop	125	17	17	0	100	1	1	Resistant
2289	NA	294	ACCase	Lolium	FALSE	Lincoln	Lolium perenne	Pinoxaden	30	19	19	0	100	1	1	Resistant
2289	NA	294	ALS	Lolium	FALSE	Lincoln	Lolium perenne	Pyroxsulam	15	18	18	0	100	1	1	Resistant
2289	NA	295	ACCase	Lolium	FALSE	Lincoln	Lolium perenne	Haloxyfop	125	17	17	0	100	1	1	Resistant
2289	NA	295	ACCase	Lolium	FALSE	Lincoln	Lolium perenne	Pinoxaden	30	14	11	3	79	1	1	Resistant
2289	NA	295	ALS	Lolium	FALSE	Lincoln	Lolium perenne	Pyroxsulam	15	14	14	0	100	1	1	Resistant
2289	NA	296	ACCase	Lolium	FALSE	Lincoln	Lolium perenne	Haloxyfop	125	16	16	0	100	1	1	Resistant
2289	NA	296	ACCase	Lolium	FALSE	Lincoln	Lolium perenne	Pinoxaden	30	17	17	0	100	1	1	Resistant
2289	NA	296	ALS	Lolium	FALSE	Lincoln	Lolium perenne	Pyroxsulam	15	19	19	0	100	1	1	Resistant
2289	NA	297	ACCase	Lolium	FALSE	Lincoln	Lolium perenne	Haloxyfop	125	20	20	0	100	1	1	Resistant
2289	NA	297	ACCase	Lolium	FALSE	Lincoln	Lolium perenne	Pinoxaden	30	20	20	0	100	1	1	Resistant
2289	NA	297	ALS	Lolium	FALSE	Lincoln	Lolium perenne	Pyroxsulam	15	20	20	0	100	1	1	Resistant
2289	NA	298	ACCase	Lolium	FALSE	Lincoln	Lolium perenne	Haloxyfop	125	18	18	0	100	1	1	Resistant
2289	NA	298	ACCase	Lolium	FALSE	Lincoln	Lolium perenne	Pinoxaden	30	30	30	0	100	1	1	Resistant
2289	NA	298	ALS	Lolium	FALSE	Lincoln	Lolium perenne	Pyroxsulam	15	18	18	0	100	1	1	Resistant
2289	NA	299	ACCase	Lolium	FALSE	Lincoln	Lolium perenne	Haloxyfop	125	15	15	0	100	1	1	Resistant
2289	NA	299	ACCase	Lolium	FALSE	Lincoln	Lolium perenne	Pinoxaden	30	15	11	4	73	1	1	Resistant
2289	NA	299	ALS	Lolium	FALSE	Lincoln	Lolium perenne	Pyroxsulam	15	16	16	0	100	1	1	Resistant
2289	NA	300	ACCase	Lolium	FALSE	Lincoln	Lolium perenne	Haloxyfop	125	17	17	0	100	1	1	Resistant
2289	NA	300	ACCase	Lolium	FALSE	Lincoln	Lolium perenne	Pinoxaden	30	20	20	0	100	1	1	Resistant
2289	NA	300	ALS	Lolium	FALSE	Lincoln	Lolium perenne	Pyroxsulam	15	18	18	0	100	1	1	Resistant
2289	NA	301	ACCase	Lolium	FALSE	Lincoln	Lolium perenne	Haloxyfop	125	9	7	2	78	1	1	Resistant
2289	NA	301	ACCase	Lolium	FALSE	Lincoln	Lolium perenne	Pinoxaden	30	16	13	3	81	1	1	Resistant
2289	NA	301	ALS	Lolium	FALSE	Lincoln	Lolium perenne	Pyroxsulam	15	7	7	0	100	1	1	Resistant
2289	NA	302	ACCase	Lolium	FALSE	Lincoln	Lolium perenne	Clethodim	120	18	0	18	0	0	1	Susceptible
2289	NA	302	ACCase	Lolium	FALSE	Lincoln	Lolium perenne	Haloxyfop	125	15	13	2	87	1	1	Resistant
2289	NA	302	ACCase	Lolium	FALSE	Lincoln	Lolium perenne	Haloxyfop	60	19	17	2	89	1	1	Resistant
2289	NA	302	ACCase	Lolium	FALSE	Lincoln	Lolium perenne	Pinoxaden	30	44	41	3	93	1	1	Resistant
2289	NA	302	ALS	Lolium	FALSE	Lincoln	Lolium perenne	Iodosulfuron	7.5	14	12	2	86	1	1	Resistant
2289	NA	302	ALS	Lolium	FALSE	Lincoln	Lolium perenne	Pyroxsulam	15	34	21	13	62	1	1	Resistant
2289	NA	302	EPSPS	Lolium	FALSE	Lincoln	Lolium perenne	Glyphosate	1458	19	0	19	0	0	1	Susceptible
2289	NA	303	ACCase	Lolium	FALSE	Lincoln	Lolium perenne	Haloxyfop	125	9	8	1	89	1	1	Resistant
2289	NA	303	ACCase	Lolium	FALSE	Lincoln	Lolium perenne	Pinoxaden	30	18	13	5	72	1	1	Resistant
2289	NA	303	ALS	Lolium	FALSE	Lincoln	Lolium perenne	Pyroxsulam	15	7	7	0	100	1	1	Resistant
2289	NA	304	ACCase	Lolium	FALSE	Lincoln	Lolium perenne	Clethodim	120	15	0	15	0	0	1	Susceptible
2289	NA	304	ACCase	Lolium	FALSE	Lincoln	Lolium perenne	Haloxyfop	125	10	9	1	90	1	1	Resistant
2289	NA	304	ACCase	Lolium	FALSE	Lincoln	Lolium perenne	Pinoxaden	30	20	19	1	95	1	1	Resistant
2289	NA	304	ALS	Lolium	FALSE	Lincoln	Lolium perenne	Iodosulfuron	7.5	5	3	2	60	0	1	Susceptible
2289	NA	304	ALS	Lolium	FALSE	Lincoln	Lolium perenne	Pyroxsulam	15	23	23	0	100	1	1	Resistant
2289	NA	304	EPSPS	Lolium	FALSE	Lincoln	Lolium perenne	Glyphosate	1458	7	0	7	0	0	1	Susceptible
2289	NA	305	ACCase	Lolium	FALSE	Lincoln	Lolium perenne	Haloxyfop	125	15	15	0	100	1	1	Resistant
2289	NA	305	ACCase	Lolium	FALSE	Lincoln	Lolium perenne	Pinoxaden	30	28	28	0	100	1	1	Resistant
2289	NA	305	ALS	Lolium	FALSE	Lincoln	Lolium perenne	Pyroxsulam	15	17	17	0	100	1	1	Resistant
2289	NA	306	ACCase	Lolium	FALSE	Lincoln	Lolium perenne	Haloxyfop	125	18	18	0	100	1	1	Resistant
2289	NA	306	ACCase	Lolium	FALSE	Lincoln	Lolium perenne	Pinoxaden	30	34	34	0	100	1	1	Resistant
2289	NA	306	ALS	Lolium	FALSE	Lincoln	Lolium perenne	Pyroxsulam	15	19	19	0	100	1	1	Resistant
2289	NA	307	ACCase	Lolium	FALSE	Lincoln	Lolium perenne	Clethodim	120	12	0	12	0	0	1	Susceptible
2289	NA	307	ACCase	Lolium	FALSE	Lincoln	Lolium perenne	Haloxyfop	125	20	20	0	100	1	1	Resistant
2289	NA	307	ACCase	Lolium	FALSE	Lincoln	Lolium perenne	Haloxyfop	60	15	14	1	93	1	1	Resistant
2289	NA	307	ACCase	Lolium	FALSE	Lincoln	Lolium perenne	Pinoxaden	30	46	46	0	100	1	1	Resistant
2289	NA	307	ALS	Lolium	FALSE	Lincoln	Lolium perenne	Iodosulfuron	7.5	7	5	2	71	1	1	Resistant
2289	NA	307	ALS	Lolium	FALSE	Lincoln	Lolium perenne	Pyroxsulam	15	37	35	2	95	1	1	Resistant
2289	NA	307	EPSPS	Lolium	FALSE	Lincoln	Lolium perenne	Glyphosate	1458	6	0	6	0	0	1	Susceptible
2289	NA	309	ACCase	Lolium	FALSE	Lincoln	Lolium perenne	Haloxyfop	125	19	19	0	100	1	1	Resistant
2289	NA	309	ACCase	Lolium	FALSE	Lincoln	Lolium perenne	Pinoxaden	30	31	31	0	100	1	1	Resistant
2289	NA	309	ALS	Lolium	FALSE	Lincoln	Lolium perenne	Pyroxsulam	15	19	19	0	100	1	1	Resistant
2289	NA	310	ACCase	Lolium	FALSE	Lincoln	Lolium perenne	Haloxyfop	125	19	19	0	100	1	1	Resistant
2289	NA	310	ACCase	Lolium	FALSE	Lincoln	Lolium perenne	Pinoxaden	30	37	37	0	100	1	1	Resistant
2289	NA	310	ALS	Lolium	FALSE	Lincoln	Lolium perenne	Pyroxsulam	15	20	20	0	100	1	1	Resistant
2289	NA	311	ACCase	Lolium	FALSE	Lincoln	Lolium perenne	Haloxyfop	125	15	15	0	100	1	1	Resistant
2289	NA	311	ACCase	Lolium	FALSE	Lincoln	Lolium perenne	Pinoxaden	30	33	33	0	100	1	1	Resistant
2289	NA	311	ALS	Lolium	FALSE	Lincoln	Lolium perenne	Pyroxsulam	15	13	13	0	100	1	1	Resistant
2289	NA	312	ACCase	Lolium	FALSE	Lincoln	Lolium perenne	Haloxyfop	125	18	18	0	100	1	1	Resistant
2289	NA	312	ACCase	Lolium	FALSE	Lincoln	Lolium perenne	Pinoxaden	30	33	33	0	100	1	1	Resistant
2289	NA	312	ALS	Lolium	FALSE	Lincoln	Lolium perenne	Pyroxsulam	15	17	17	0	100	1	1	Resistant
2289	NA	2423	ACCase	Lolium	FALSE	Lincoln	Lolium multiflorum	Haloxyfop	125	19	19	0	100	1	1	Resistant
2289	NA	2423	ACCase	Lolium	FALSE	Lincoln	Lolium multiflorum	Pinoxaden	30	18	18	0	100	1	1	Resistant
2289	NA	2423	ALS	Lolium	FALSE	Lincoln	Lolium multiflorum	Pyroxsulam	15	16	16	0	100	1	1	Resistant
2290	NA	264	EPSPS	Lolium	FALSE	Lincoln	Lolium hybridum	Glyphosate	1458	8	5	3	62	1	1	Resistant
2290	NA	266	EPSPS	Lolium	FALSE	Lincoln	Lolium hybridum	Glyphosate	1458	9	4	5	44	1	1	Resistant
2290	NA	267	EPSPS	Lolium	FALSE	Lincoln	Lolium hybridum	Glyphosate	1458	11	3	8	27	0	1	Susceptible
2290	NA	272	EPSPS	Lolium	FALSE	Lincoln	Lolium hybridum	Glyphosate	1458	12	0	12	0	0	1	Susceptible
2290	NA	277	EPSPS	Lolium	FALSE	Lincoln	Lolium multiflorum	Glyphosate	1458	13	5	8	38	1	1	Resistant
2290	NA	279	EPSPS	Lolium	FALSE	Lincoln	Lolium multiflorum	Glyphosate	1458	6	2	4	33	0	1	Susceptible
2290	NA	2130	ACCase	Lolium	FALSE	Lincoln	Lolium multiflorum	Clethodim	120	18	0	18	0	0	1	Susceptible
2290	NA	2130	ACCase	Lolium	FALSE	Lincoln	Lolium multiflorum	Haloxyfop	60	20	0	20	0	0	1	Susceptible
2290	NA	2130	ACCase	Lolium	FALSE	Lincoln	Lolium multiflorum	Pinoxaden	30	19	0	19	0	0	1	Susceptible
2290	NA	2130	ALS	Lolium	FALSE	Lincoln	Lolium multiflorum	Iodosulfuron	7.5	16	0	16	0	0	1	Susceptible
2290	NA	2130	ALS	Lolium	FALSE	Lincoln	Lolium multiflorum	Pyroxsulam	15	17	0	17	0	0	1	Susceptible
2290	NA	2130	EPSPS	Lolium	FALSE	Lincoln	Lolium multiflorum	Glyphosate	1458	19	9	10	47	1	1	Resistant
2290	NA	2131	ACCase	Lolium	FALSE	Lincoln	Lolium multiflorum	Clethodim	120	20	0	20	0	0	1	Susceptible
2290	NA	2131	ACCase	Lolium	FALSE	Lincoln	Lolium multiflorum	Haloxyfop	60	18	0	18	0	0	1	Susceptible
2290	NA	2131	ACCase	Lolium	FALSE	Lincoln	Lolium multiflorum	Pinoxaden	30	17	0	17	0	0	1	Susceptible
2290	NA	2131	ALS	Lolium	FALSE	Lincoln	Lolium multiflorum	Iodosulfuron	7.5	18	0	18	0	0	1	Susceptible
2290	NA	2131	ALS	Lolium	FALSE	Lincoln	Lolium multiflorum	Pyroxsulam	15	17	0	17	0	0	1	Susceptible
2290	NA	2131	EPSPS	Lolium	FALSE	Lincoln	Lolium multiflorum	Glyphosate	1458	19	12	7	63	1	1	Resistant
2290	NA	2132	ACCase	Lolium	FALSE	Lincoln	Lolium multiflorum	Clethodim	120	17	0	17	0	0	1	Susceptible
2290	NA	2132	ACCase	Lolium	FALSE	Lincoln	Lolium multiflorum	Haloxyfop	60	13	0	13	0	0	1	Susceptible
2290	NA	2132	ACCase	Lolium	FALSE	Lincoln	Lolium multiflorum	Pinoxaden	30	16	0	16	0	0	1	Susceptible
2290	NA	2132	ALS	Lolium	FALSE	Lincoln	Lolium multiflorum	Iodosulfuron	7.5	18	0	18	0	0	1	Susceptible
2290	NA	2132	ALS	Lolium	FALSE	Lincoln	Lolium multiflorum	Pyroxsulam	15	18	0	18	0	0	1	Susceptible
2290	NA	2132	EPSPS	Lolium	FALSE	Lincoln	Lolium multiflorum	Glyphosate	1458	20	5	15	25	1	1	Resistant
2290	NA	2133	ACCase	Lolium	FALSE	Lincoln	Lolium multiflorum	Clethodim	120	20	0	20	0	0	1	Susceptible
2290	NA	2133	ACCase	Lolium	FALSE	Lincoln	Lolium multiflorum	Haloxyfop	60	18	0	18	0	0	1	Susceptible
2290	NA	2133	ACCase	Lolium	FALSE	Lincoln	Lolium multiflorum	Pinoxaden	30	18	0	18	0	0	1	Susceptible
2290	NA	2133	ALS	Lolium	FALSE	Lincoln	Lolium multiflorum	Iodosulfuron	7.5	17	0	17	0	0	1	Susceptible
2290	NA	2133	ALS	Lolium	FALSE	Lincoln	Lolium multiflorum	Pyroxsulam	15	16	0	16	0	0	1	Susceptible
2290	NA	2133	EPSPS	Lolium	FALSE	Lincoln	Lolium multiflorum	Glyphosate	1458	17	6	11	35	1	1	Resistant
2290	NA	2134	EPSPS	Lolium	FALSE	Lincoln	Lolium multiflorum	Glyphosate	1458	16	10	6	62	1	1	Resistant
2290	NA	2136	EPSPS	Lolium	FALSE	Lincoln	Lolium multiflorum	Glyphosate	1458	20	14	6	70	1	1	Resistant
2290	NA	2137	EPSPS	Lolium	FALSE	Lincoln	Lolium multiflorum	Glyphosate	1458	18	12	6	67	1	1	Resistant
2290	NA	2138	EPSPS	Lolium	FALSE	Lincoln	Lolium multiflorum	Glyphosate	1458	20	9	11	45	1	1	Resistant
2290	NA	2140	ACCase	Lolium	FALSE	Lincoln	Lolium multiflorum	Clethodim	120	17	0	17	0	0	1	Susceptible
2290	NA	2140	ACCase	Lolium	FALSE	Lincoln	Lolium multiflorum	Haloxyfop	60	18	0	18	0	0	1	Susceptible
2290	NA	2140	ACCase	Lolium	FALSE	Lincoln	Lolium multiflorum	Pinoxaden	30	19	0	19	0	0	1	Susceptible
2290	NA	2140	ALS	Lolium	FALSE	Lincoln	Lolium multiflorum	Pyroxsulam	15	13	0	13	0	0	1	Susceptible
2290	NA	2140	EPSPS	Lolium	FALSE	Lincoln	Lolium multiflorum	Glyphosate	1458	16	4	12	25	1	1	Resistant
2290	NA	2141	ACCase	Lolium	FALSE	Lincoln	Lolium multiflorum	Clethodim	120	20	0	20	0	0	1	Susceptible
2290	NA	2141	ACCase	Lolium	FALSE	Lincoln	Lolium multiflorum	Haloxyfop	60	17	0	17	0	0	1	Susceptible
2290	NA	2141	ACCase	Lolium	FALSE	Lincoln	Lolium multiflorum	Pinoxaden	30	18	0	18	0	0	1	Susceptible
2290	NA	2141	ALS	Lolium	FALSE	Lincoln	Lolium multiflorum	Iodosulfuron	7.5	18	0	18	0	0	1	Susceptible
2290	NA	2141	ALS	Lolium	FALSE	Lincoln	Lolium multiflorum	Pyroxsulam	15	19	0	19	0	0	1	Susceptible
2290	NA	2141	EPSPS	Lolium	FALSE	Lincoln	Lolium multiflorum	Glyphosate	1458	16	5	11	31	1	1	Resistant
2290	NA	2142	ACCase	Lolium	FALSE	Lincoln	Lolium multiflorum	Clethodim	120	19	0	19	0	0	1	Susceptible
2290	NA	2142	ACCase	Lolium	FALSE	Lincoln	Lolium multiflorum	Haloxyfop	60	16	0	16	0	0	1	Susceptible
2290	NA	2142	ACCase	Lolium	FALSE	Lincoln	Lolium multiflorum	Pinoxaden	30	18	0	18	0	0	1	Susceptible
2290	NA	2142	ALS	Lolium	FALSE	Lincoln	Lolium multiflorum	Pyroxsulam	15	15	0	15	0	0	1	Susceptible
2290	NA	2142	EPSPS	Lolium	FALSE	Lincoln	Lolium multiflorum	Glyphosate	1458	18	4	14	22	1	1	Resistant
2290	NA	2143	ACCase	Lolium	FALSE	Lincoln	Lolium multiflorum	Clethodim	120	16	0	16	0	0	1	Susceptible
2290	NA	2143	ACCase	Lolium	FALSE	Lincoln	Lolium multiflorum	Haloxyfop	60	16	0	16	0	0	1	Susceptible
2290	NA	2143	ACCase	Lolium	FALSE	Lincoln	Lolium multiflorum	Pinoxaden	30	17	0	17	0	0	1	Susceptible
2290	NA	2143	ALS	Lolium	FALSE	Lincoln	Lolium multiflorum	Iodosulfuron	7.5	16	0	16	0	0	1	Susceptible
2290	NA	2143	ALS	Lolium	FALSE	Lincoln	Lolium multiflorum	Pyroxsulam	15	12	0	12	0	0	1	Susceptible
2290	NA	2143	EPSPS	Lolium	FALSE	Lincoln	Lolium multiflorum	Glyphosate	1458	19	6	13	32	1	1	Resistant
2290	NA	2144	ACCase	Lolium	FALSE	Lincoln	Lolium multiflorum	Clethodim	120	20	0	20	0	0	1	Susceptible
2290	NA	2144	ACCase	Lolium	FALSE	Lincoln	Lolium multiflorum	Haloxyfop	60	20	0	20	0	0	1	Susceptible
2290	NA	2144	ACCase	Lolium	FALSE	Lincoln	Lolium multiflorum	Pinoxaden	30	18	0	18	0	0	1	Susceptible
2290	NA	2144	ALS	Lolium	FALSE	Lincoln	Lolium multiflorum	Iodosulfuron	7.5	20	0	20	0	0	1	Susceptible
2290	NA	2144	EPSPS	Lolium	FALSE	Lincoln	Lolium multiflorum	Glyphosate	1458	36	19	17	53	1	1	Resistant
2290	NA	2145	EPSPS	Lolium	FALSE	Lincoln	Lolium multiflorum	Glyphosate	1458	18	12	6	67	1	1	Resistant
2290	NA	2146	EPSPS	Lolium	FALSE	Lincoln	Lolium multiflorum	Glyphosate	1458	18	5	13	28	1	1	Resistant
2290	NA	2147	EPSPS	Lolium	FALSE	Lincoln	Lolium multiflorum	Glyphosate	1458	20	18	2	90	1	1	Resistant
2290	NA	2148	EPSPS	Lolium	FALSE	Lincoln	Lolium multiflorum	Glyphosate	1458	19	7	12	37	1	1	Resistant
2291	NA	5	ACCase	Lolium	FALSE	Lincoln	Lolium multiflorum	Clethodim	120	20	0	20	0	0	1	Susceptible
2291	NA	5	ACCase	Lolium	FALSE	Lincoln	Lolium multiflorum	Haloxyfop	125	20	20	0	100	1	1	Resistant
2291	NA	5	ACCase	Lolium	FALSE	Lincoln	Lolium multiflorum	Pinoxaden	30	27	20	7	74	1	1	Resistant
2291	NA	5	ALS	Lolium	FALSE	Lincoln	Lolium multiflorum	Iodosulfuron	7.5	19	6	13	32	1	1	Resistant
2291	NA	5	ALS	Lolium	FALSE	Lincoln	Lolium multiflorum	Pyroxsulam	15	26	2	24	8	0	1	Susceptible
2291	NA	5	EPSPS	Lolium	FALSE	Lincoln	Lolium multiflorum	Glyphosate	1458	18	0	18	0	0	1	Susceptible
2291	NA	330	ACCase	Lolium	FALSE	Lincoln	Lolium multiflorum	Clethodim	120	19	0	19	0	0	1	Susceptible
2291	NA	330	ACCase	Lolium	FALSE	Lincoln	Lolium multiflorum	Haloxyfop	125	20	20	0	100	1	1	Resistant
2291	NA	330	ACCase	Lolium	FALSE	Lincoln	Lolium multiflorum	Pinoxaden	30	19	19	0	100	1	1	Resistant
2291	NA	330	ALS	Lolium	FALSE	Lincoln	Lolium multiflorum	Iodosulfuron	7.5	19	3	16	16	0	1	Susceptible
2291	NA	330	EPSPS	Lolium	FALSE	Lincoln	Lolium multiflorum	Glyphosate	1458	20	0	20	0	0	1	Susceptible
2291	NA	331	ACCase	Lolium	FALSE	Lincoln	Lolium multiflorum	Clethodim	120	20	0	20	0	0	1	Susceptible
2291	NA	331	ACCase	Lolium	FALSE	Lincoln	Lolium multiflorum	Haloxyfop	125	18	18	0	100	1	1	Resistant
2291	NA	331	ACCase	Lolium	FALSE	Lincoln	Lolium multiflorum	Pinoxaden	30	20	20	0	100	1	1	Resistant
2291	NA	331	EPSPS	Lolium	FALSE	Lincoln	Lolium multiflorum	Glyphosate	1458	19	0	19	0	0	1	Susceptible
2291	NA	332	ACCase	Lolium	FALSE	Lincoln	Lolium multiflorum	Clethodim	120	19	0	19	0	0	1	Susceptible
2291	NA	332	ACCase	Lolium	FALSE	Lincoln	Lolium multiflorum	Haloxyfop	125	20	20	0	100	1	1	Resistant
2291	NA	332	ACCase	Lolium	FALSE	Lincoln	Lolium multiflorum	Pinoxaden	30	18	18	0	100	1	1	Resistant
2291	NA	332	ALS	Lolium	FALSE	Lincoln	Lolium multiflorum	Pyroxsulam	15	20	0	20	0	0	1	Susceptible
2291	NA	332	EPSPS	Lolium	FALSE	Lincoln	Lolium multiflorum	Glyphosate	1458	19	0	19	0	0	1	Susceptible
2291	NA	333	ACCase	Lolium	FALSE	Lincoln	Lolium multiflorum	Clethodim	120	19	0	19	0	0	1	Susceptible
2291	NA	333	ACCase	Lolium	FALSE	Lincoln	Lolium multiflorum	Haloxyfop	60	16	16	0	100	1	1	Resistant
2291	NA	333	ACCase	Lolium	FALSE	Lincoln	Lolium multiflorum	Pinoxaden	30	18	18	0	100	1	1	Resistant
2291	NA	333	ALS	Lolium	FALSE	Lincoln	Lolium multiflorum	Iodosulfuron	7.5	18	0	18	0	0	1	Susceptible
2291	NA	333	ALS	Lolium	FALSE	Lincoln	Lolium multiflorum	Pyroxsulam	15	20	0	20	0	0	1	Susceptible
2291	NA	333	EPSPS	Lolium	FALSE	Lincoln	Lolium multiflorum	Glyphosate	1458	19	0	19	0	0	1	Susceptible
2292	NA	216	ACCase	Lolium	FALSE	Lincoln	Lolium multiflorum	Clethodim	120	13	0	13	0	0	1	Susceptible
2292	NA	216	ACCase	Lolium	FALSE	Lincoln	Lolium multiflorum	Haloxyfop	125	10	10	0	100	1	1	Resistant
2292	NA	216	ACCase	Lolium	FALSE	Lincoln	Lolium multiflorum	Haloxyfop	60	15	15	0	100	1	1	Resistant
2292	NA	216	ACCase	Lolium	FALSE	Lincoln	Lolium multiflorum	Pinoxaden	30	26	18	8	69	1	1	Resistant
2292	NA	216	ALS	Lolium	FALSE	Lincoln	Lolium multiflorum	Iodosulfuron	7.5	8	5	3	62	1	1	Resistant
2292	NA	216	ALS	Lolium	FALSE	Lincoln	Lolium multiflorum	Pyroxsulam	15	23	19	4	83	1	1	Resistant
2292	NA	216	EPSPS	Lolium	FALSE	Lincoln	Lolium multiflorum	Glyphosate	1458	15	0	15	0	0	1	Susceptible
2292	NA	326	ACCase	Lolium	FALSE	Lincoln	Lolium multiflorum	Clethodim	120	14	0	14	0	0	1	Susceptible
2292	NA	326	ACCase	Lolium	FALSE	Lincoln	Lolium multiflorum	Haloxyfop	60	17	14	3	82	1	1	Resistant
2292	NA	326	ACCase	Lolium	FALSE	Lincoln	Lolium multiflorum	Pinoxaden	30	18	14	4	78	1	1	Resistant
2292	NA	326	ALS	Lolium	FALSE	Lincoln	Lolium multiflorum	Pyroxsulam	15	18	12	6	67	1	1	Resistant
2292	NA	326	EPSPS	Lolium	FALSE	Lincoln	Lolium multiflorum	Glyphosate	1458	18	0	18	0	0	1	Susceptible
2292	NA	327	ACCase	Lolium	FALSE	Lincoln	Lolium multiflorum	Clethodim	120	13	0	13	0	0	1	Susceptible
2292	NA	327	ACCase	Lolium	FALSE	Lincoln	Lolium multiflorum	Haloxyfop	60	20	18	2	90	1	1	Resistant
2292	NA	327	ACCase	Lolium	FALSE	Lincoln	Lolium multiflorum	Pinoxaden	30	15	12	3	80	1	1	Resistant
2292	NA	327	ALS	Lolium	FALSE	Lincoln	Lolium multiflorum	Pyroxsulam	15	12	4	8	33	1	1	Resistant
2292	NA	327	EPSPS	Lolium	FALSE	Lincoln	Lolium multiflorum	Glyphosate	1458	18	0	18	0	0	1	Susceptible
2292	NA	328	ACCase	Lolium	FALSE	Lincoln	Lolium multiflorum	Clethodim	120	13	0	13	0	0	1	Susceptible
2292	NA	328	ACCase	Lolium	FALSE	Lincoln	Lolium multiflorum	Haloxyfop	60	20	16	4	80	1	1	Resistant
2292	NA	328	ACCase	Lolium	FALSE	Lincoln	Lolium multiflorum	Pinoxaden	30	17	14	3	82	1	1	Resistant
2292	NA	328	ALS	Lolium	FALSE	Lincoln	Lolium multiflorum	Pyroxsulam	15	11	4	7	36	1	1	Resistant
2292	NA	328	EPSPS	Lolium	FALSE	Lincoln	Lolium multiflorum	Glyphosate	1458	16	0	16	0	0	1	Susceptible
2292	NA	329	ACCase	Lolium	FALSE	Lincoln	Lolium multiflorum	Clethodim	120	17	0	17	0	0	1	Susceptible
2292	NA	329	ACCase	Lolium	FALSE	Lincoln	Lolium multiflorum	Haloxyfop	60	15	15	0	100	1	1	Resistant
2292	NA	329	ACCase	Lolium	FALSE	Lincoln	Lolium multiflorum	Pinoxaden	30	15	15	0	100	1	1	Resistant
2292	NA	329	ALS	Lolium	FALSE	Lincoln	Lolium multiflorum	Iodosulfuron	7.5	18	0	18	0	0	1	Susceptible
2292	NA	329	ALS	Lolium	FALSE	Lincoln	Lolium multiflorum	Pyroxsulam	15	18	4	14	22	1	1	Resistant
2292	NA	329	EPSPS	Lolium	FALSE	Lincoln	Lolium multiflorum	Glyphosate	1458	14	0	14	0	0	1	Susceptible
2293	NA	2443	ALS	Digitaria	FALSE	other	Digitaria sanguinalis	Nicosulfuron	120	28	10	18	36	1	1	Resistant
2293	NA	2443	ALS	Digitaria	FALSE	other	Digitaria sanguinalis	Nicosulfuron	240	27	4	23	15	1	1	Resistant
2293	NA	2443	ALS	Digitaria	FALSE	other	Digitaria sanguinalis	Nicosulfuron	30	39	34	5	87	1	1	Resistant
2293	NA	2443	ALS	Digitaria	FALSE	other	Digitaria sanguinalis	Nicosulfuron	60	53	43	10	81	1	1	Resistant
[truncated: 279 more rows]
